# Supplementary material
Source: publisher figshare collection journal article supplement (https://gsajournals.figshare.com/ndownloader/files/24181727)
Supplement: Supplementary file 1 [file 24181727]

self	Site	DNA ID	genotyped	Site	rep	plot	row	tree	FAMILY	Mum	Dad	Site_Adjusted_DBH	Site_Adjusted_KPY	Site_Adjusted_Ht	Site_Adjusted_Vol
1	NA	NA	NA	NA	NA	NA	NA	NA	grand_mum	NA	NA	NA	NA	NA	NA
2	NA	NA	NA	NA	NA	NA	NA	NA	grand_mum	NA	NA	NA	NA	NA	NA
3	NA	NA	NA	NA	NA	NA	NA	NA	grand_mum	NA	NA	NA	NA	NA	NA
4	NA	NA	NA	NA	NA	NA	NA	NA	grand_mum	NA	NA	NA	NA	NA	NA
5	NA	NA	NA	NA	NA	NA	NA	NA	grand_mum	NA	NA	NA	NA	NA	NA
6	NA	NA	NA	NA	NA	NA	NA	NA	grand_mum	NA	NA	NA	NA	NA	NA
7	NA	NA	NA	NA	NA	NA	NA	NA	grand_mum	NA	NA	NA	NA	NA	NA
8	NA	NA	NA	NA	NA	NA	NA	NA	grand_mum	NA	NA	NA	NA	NA	NA
9	NA	NA	NA	NA	NA	NA	NA	NA	grand_mum	NA	NA	NA	NA	NA	NA
10	NA	NA	NA	NA	NA	NA	NA	NA	grand_mum	NA	NA	NA	NA	NA	NA
11	NA	NA	NA	NA	NA	NA	NA	NA	grand_mum	NA	NA	NA	NA	NA	NA
12	NA	NA	NA	NA	NA	NA	NA	NA	grand_mum	NA	NA	NA	NA	NA	NA
13	NA	NA	NA	NA	NA	NA	NA	NA	grand_mum	NA	NA	NA	NA	NA	NA
14	NA	NA	NA	NA	NA	NA	NA	NA	grand_mum	NA	NA	NA	NA	NA	NA
15	NA	NA	NA	NA	NA	NA	NA	NA	grand_mum	NA	NA	NA	NA	NA	NA
16	NA	NA	NA	NA	NA	NA	NA	NA	grand_mum	NA	NA	NA	NA	NA	NA
17	NA	NA	NA	NA	NA	NA	NA	NA	grand_mum	NA	NA	NA	NA	NA	NA
18	NA	NA	NA	NA	NA	NA	NA	NA	grand_mum	NA	NA	NA	NA	NA	NA
19	NA	NA	NA	NA	NA	NA	NA	NA	grand_mum	NA	NA	NA	NA	NA	NA
20	NA	NA	NA	NA	NA	NA	NA	NA	grand_mum	NA	NA	NA	NA	NA	NA
21	NA	NA	NA	NA	NA	NA	NA	NA	grand_mum	NA	NA	NA	NA	NA	NA
22	NA	NA	NA	NA	NA	NA	NA	NA	grand_mum	NA	NA	NA	NA	NA	NA
23	NA	NA	NA	NA	NA	NA	NA	NA	grand_mum	NA	NA	NA	NA	NA	NA
24	NA	NA	NA	NA	NA	NA	NA	NA	grand_mum	NA	NA	NA	NA	NA	NA
25	NA	NA	NA	NA	NA	NA	NA	NA	grand_mum	NA	NA	NA	NA	NA	NA
26	NA	NA	NA	NA	NA	NA	NA	NA	grand_mum	NA	NA	NA	NA	NA	NA
27	NA	NA	NA	NA	NA	NA	NA	NA	grand_mum	NA	NA	NA	NA	NA	NA
28	NA	NA	NA	NA	NA	NA	NA	NA	grand_mum	NA	NA	NA	NA	NA	NA
29	NA	NA	NA	NA	NA	NA	NA	NA	grand_mum	NA	NA	NA	NA	NA	NA
30	NA	NA	NA	NA	NA	NA	NA	NA	grand_mum	NA	NA	NA	NA	NA	NA
31	NA	NA	NA	NA	NA	NA	NA	NA	grand_mum	NA	NA	NA	NA	NA	NA
32	NA	NA	NA	NA	NA	NA	NA	NA	grand_mum	NA	NA	NA	NA	NA	NA
33	NA	NA	NA	NA	NA	NA	NA	NA	grand_mum	NA	NA	NA	NA	NA	NA
34	NA	NA	NA	NA	NA	NA	NA	NA	grand_mum	NA	NA	NA	NA	NA	NA
35	NA	NA	NA	NA	NA	NA	NA	NA	grand_mum	NA	NA	NA	NA	NA	NA
36	NA	NA	NA	NA	NA	NA	NA	NA	grand_mum	NA	NA	NA	NA	NA	NA
37	NA	NA	NA	NA	NA	NA	NA	NA	grand_mum	NA	NA	NA	NA	NA	NA
38	NA	NA	NA	NA	NA	NA	NA	NA	grand_mum	NA	NA	NA	NA	NA	NA
39	NA	NA	NA	NA	NA	NA	NA	NA	grand_mum	NA	NA	NA	NA	NA	NA
40	NA	NA	NA	NA	NA	NA	NA	NA	grand_mum	NA	NA	NA	NA	NA	NA
41	NA	NA	NA	NA	NA	NA	NA	NA	grand_mum	NA	NA	NA	NA	NA	NA
42	NA	NA	NA	NA	NA	NA	NA	NA	grand_mum	NA	NA	NA	NA	NA	NA
43	NA	NA	NA	NA	NA	NA	NA	NA	grand_mum	NA	NA	NA	NA	NA	NA
44	NA	NA	NA	NA	NA	NA	NA	NA	grand_mum	NA	NA	NA	NA	NA	NA
45	NA	NA	NA	NA	NA	NA	NA	NA	grand_mum	NA	NA	NA	NA	NA	NA
46	NA	NA	NA	NA	NA	NA	NA	NA	grand_mum	NA	NA	NA	NA	NA	NA
47	NA	NA	NA	NA	NA	NA	NA	NA	grand_mum	NA	NA	NA	NA	NA	NA
48	NA	NA	NA	NA	NA	NA	NA	NA	grand_mum	NA	NA	NA	NA	NA	NA
49	NA	NA	NA	NA	NA	NA	NA	NA	grand_mum	NA	NA	NA	NA	NA	NA
50	NA	NA	NA	NA	NA	NA	NA	NA	grand_mum	NA	NA	NA	NA	NA	NA
51	NA	NA	NA	NA	NA	NA	NA	NA	grand_mum	NA	NA	NA	NA	NA	NA
52	NA	NA	NA	NA	NA	NA	NA	NA	grand_mum	NA	NA	NA	NA	NA	NA
53	NA	NA	NA	NA	NA	NA	NA	NA	grand_mum	NA	NA	NA	NA	NA	NA
54	NA	NA	NA	NA	NA	NA	NA	NA	grand_mum	NA	NA	NA	NA	NA	NA
55	NA	NA	NA	NA	NA	NA	NA	NA	grand_mum	NA	NA	NA	NA	NA	NA
56	NA	NA	NA	NA	NA	NA	NA	NA	grand_mum	NA	NA	NA	NA	NA	NA
57	NA	NA	NA	NA	NA	NA	NA	NA	grand_mum	NA	NA	NA	NA	NA	NA
58	NA	NA	NA	NA	NA	NA	NA	NA	grand_mum	NA	NA	NA	NA	NA	NA
59	NA	NA	NA	NA	NA	NA	NA	NA	grand_mum	NA	NA	NA	NA	NA	NA
60	NA	NA	NA	NA	NA	NA	NA	NA	grand_mum	NA	NA	NA	NA	NA	NA
61	NA	NA	NA	NA	NA	NA	NA	NA	grand_mum	NA	NA	NA	NA	NA	NA
62	NA	NA	NA	NA	NA	NA	NA	NA	grand_mum	NA	NA	NA	NA	NA	NA
63	NA	NA	NA	NA	NA	NA	NA	NA	grand_mum	NA	NA	NA	NA	NA	NA
64	NA	NA	NA	NA	NA	NA	NA	NA	grand_mum	NA	NA	NA	NA	NA	NA
65	NA	NA	NA	NA	NA	NA	NA	NA	grand_mum	NA	NA	NA	NA	NA	NA
66	NA	NA	NA	NA	NA	NA	NA	NA	grand_mum	NA	NA	NA	NA	NA	NA
67	NA	NA	NA	NA	NA	NA	NA	NA	grand_mum	NA	NA	NA	NA	NA	NA
68	NA	NA	NA	NA	NA	NA	NA	NA	grand_mum	NA	NA	NA	NA	NA	NA
69	NA	NA	NA	NA	NA	NA	NA	NA	grand_mum	NA	NA	NA	NA	NA	NA
70	NA	NA	NA	NA	NA	NA	NA	NA	grand_mum	NA	NA	NA	NA	NA	NA
71	NA	NA	NA	NA	NA	NA	NA	NA	grand_mum	NA	NA	NA	NA	NA	NA
72	NA	NA	NA	NA	NA	NA	NA	NA	grand_mum	NA	NA	NA	NA	NA	NA
73	NA	NA	NA	NA	NA	NA	NA	NA	grand_mum	NA	NA	NA	NA	NA	NA
74	NA	NA	NA	NA	NA	NA	NA	NA	grand_mum	NA	NA	NA	NA	NA	NA
75	NA	NA	NA	NA	NA	NA	NA	NA	grand_mum	NA	NA	NA	NA	NA	NA
76	NA	NA	NA	NA	NA	NA	NA	NA	grand_mum	NA	NA	NA	NA	NA	NA
77	NA	NA	NA	NA	NA	NA	NA	NA	grand_mum	NA	NA	NA	NA	NA	NA
78	NA	NA	NA	NA	NA	NA	NA	NA	grand_mum	NA	NA	NA	NA	NA	NA
79	NA	NA	NA	NA	NA	NA	NA	NA	grand_mum	NA	NA	NA	NA	NA	NA
80	NA	NA	NA	NA	NA	NA	NA	NA	grand_mum	NA	NA	NA	NA	NA	NA
81	NA	NA	NA	NA	NA	NA	NA	NA	grand_mum	NA	NA	NA	NA	NA	NA
82	NA	NA	NA	NA	NA	NA	NA	NA	grand_mum	NA	NA	NA	NA	NA	NA
83	NA	NA	NA	NA	NA	NA	NA	NA	grand_mum	NA	NA	NA	NA	NA	NA
84	NA	NA	NA	NA	NA	NA	NA	NA	grand_mum	NA	NA	NA	NA	NA	NA
85	NA	NA	NA	NA	NA	NA	NA	NA	grand_mum	NA	NA	NA	NA	NA	NA
86	NA	NA	NA	NA	NA	NA	NA	NA	grand_mum	NA	NA	NA	NA	NA	NA
87	NA	NA	NA	NA	NA	NA	NA	NA	grand_mum	NA	NA	NA	NA	NA	NA
88	NA	NA	NA	NA	NA	NA	NA	NA	grand_mum	NA	NA	NA	NA	NA	NA
89	NA	NA	NA	NA	NA	NA	NA	NA	grand_mum	NA	NA	NA	NA	NA	NA
90	NA	NA	NA	NA	NA	NA	NA	NA	grand_mum	NA	NA	NA	NA	NA	NA
91	NA	NA	NA	NA	NA	NA	NA	NA	grand_mum	NA	NA	NA	NA	NA	NA
92	NA	NA	NA	NA	NA	NA	NA	NA	grand_mum	NA	NA	NA	NA	NA	NA
93	NA	NA	NA	NA	NA	NA	NA	NA	grand_mum	NA	NA	NA	NA	NA	NA
94	NA	NA	NA	NA	NA	NA	NA	NA	grand_mum	NA	NA	NA	NA	NA	NA
95	NA	NA	NA	NA	NA	NA	NA	NA	grand_mum	NA	NA	NA	NA	NA	NA
96	NA	NA	NA	NA	NA	NA	NA	NA	grand_mum	NA	NA	NA	NA	NA	NA
97	NA	NA	NA	NA	NA	NA	NA	NA	grand_mum	NA	NA	NA	NA	NA	NA
98	NA	NA	NA	NA	NA	NA	NA	NA	grand_mum	NA	NA	NA	NA	NA	NA
99	NA	NA	NA	NA	NA	NA	NA	NA	grand_mum	NA	NA	NA	NA	NA	NA
100	NA	NA	NA	NA	NA	NA	NA	NA	grand_mum	NA	NA	NA	NA	NA	NA
101	NA	NA	NA	NA	NA	NA	NA	NA	grand_mum	NA	NA	NA	NA	NA	NA
102	NA	NA	NA	NA	NA	NA	NA	NA	grand_mum	NA	NA	NA	NA	NA	NA
103	NA	NA	NA	NA	NA	NA	NA	NA	grand_mum	NA	NA	NA	NA	NA	NA
104	NA	NA	NA	NA	NA	NA	NA	NA	grand_mum	NA	NA	NA	NA	NA	NA
105	NA	NA	NA	NA	NA	NA	NA	NA	grand_mum	NA	NA	NA	NA	NA	NA
106	NA	NA	NA	NA	NA	NA	NA	NA	grand_mum	NA	NA	NA	NA	NA	NA
107	NA	NA	NA	NA	NA	NA	NA	NA	grand_mum	NA	NA	NA	NA	NA	NA
108	NA	NA	NA	NA	NA	NA	NA	NA	grand_mum	NA	NA	NA	NA	NA	NA
109	NA	NA	NA	NA	NA	NA	NA	NA	grand_mum	NA	NA	NA	NA	NA	NA
110	NA	NA	NA	NA	NA	NA	NA	NA	grand_mum	NA	NA	NA	NA	NA	NA
111	NA	NA	NA	NA	NA	NA	NA	NA	grand_mum	NA	NA	NA	NA	NA	NA
112	NA	NA	NA	NA	NA	NA	NA	NA	grand_mum	NA	NA	NA	NA	NA	NA
113	NA	NA	NA	NA	NA	NA	NA	NA	grand_mum	NA	NA	NA	NA	NA	NA
114	NA	NA	NA	NA	NA	NA	NA	NA	grand_mum	NA	NA	NA	NA	NA	NA
115	NA	NA	NA	NA	NA	NA	NA	NA	grand_mum	NA	NA	NA	NA	NA	NA
116	NA	NA	NA	NA	NA	NA	NA	NA	grand_mum	NA	NA	NA	NA	NA	NA
117	NA	NA	NA	NA	NA	NA	NA	NA	grand_mum	NA	NA	NA	NA	NA	NA
118	NA	NA	NA	NA	NA	NA	NA	NA	grand_mum	NA	NA	NA	NA	NA	NA
119	NA	NA	NA	NA	NA	NA	NA	NA	grand_mum	NA	NA	NA	NA	NA	NA
120	NA	NA	NA	NA	NA	NA	NA	NA	grand_mum	NA	NA	NA	NA	NA	NA
121	NA	NA	NA	NA	NA	NA	NA	NA	grand_mum	NA	NA	NA	NA	NA	NA
122	NA	NA	NA	NA	NA	NA	NA	NA	grand_mum	NA	NA	NA	NA	NA	NA
123	NA	NA	NA	NA	NA	NA	NA	NA	grand_mum	NA	NA	NA	NA	NA	NA
124	NA	NA	NA	NA	NA	NA	NA	NA	grand_mum	NA	NA	NA	NA	NA	NA
125	NA	NA	NA	NA	NA	NA	NA	NA	501	71	NA	NA	NA	NA	NA
126	NA	NA	NA	NA	NA	NA	NA	NA	502	111	NA	NA	NA	NA	NA
127	NA	NA	NA	NA	NA	NA	NA	NA	503	105	NA	NA	NA	NA	NA
128	NA	NA	NA	NA	NA	NA	NA	NA	504	79	NA	NA	NA	NA	NA
129	NA	NA	NA	NA	NA	NA	NA	NA	505	83	NA	NA	NA	NA	NA
130	NA	NA	NA	NA	NA	NA	NA	NA	506	79	NA	NA	NA	NA	NA
131	NA	NA	NA	NA	NA	NA	NA	NA	507	83	NA	NA	NA	NA	NA
132	NA	NA	NA	NA	NA	NA	NA	NA	508	51	NA	NA	NA	NA	NA
133	NA	NA	NA	NA	NA	NA	NA	NA	509	96	NA	NA	NA	NA	NA
134	NA	NA	NA	NA	NA	NA	NA	NA	510	65	NA	NA	NA	NA	NA
135	NA	NA	NA	NA	NA	NA	NA	NA	511	121	NA	NA	NA	NA	NA
136	NA	NA	NA	NA	NA	NA	NA	NA	512	NA	NA	NA	NA	NA	NA
137	NA	NA	NA	NA	NA	NA	NA	NA	513	25	NA	NA	NA	NA	NA
138	NA	NA	NA	NA	NA	NA	NA	NA	514	79	NA	NA	NA	NA	NA
139	NA	NA	NA	NA	NA	NA	NA	NA	515	71	NA	NA	NA	NA	NA
140	NA	NA	NA	NA	NA	NA	NA	NA	516	12	NA	NA	NA	NA	NA
141	NA	NA	NA	NA	NA	NA	NA	NA	517	116	NA	NA	NA	NA	NA
142	NA	NA	NA	NA	NA	NA	NA	NA	518	16	NA	NA	NA	NA	NA
143	NA	NA	NA	NA	NA	NA	NA	NA	519	90	NA	NA	NA	NA	NA
144	NA	NA	NA	NA	NA	NA	NA	NA	520	117	NA	NA	NA	NA	NA
145	NA	NA	NA	NA	NA	NA	NA	NA	521	33	NA	NA	NA	NA	NA
146	NA	NA	NA	NA	NA	NA	NA	NA	522	9	NA	NA	NA	NA	NA
147	NA	NA	NA	NA	NA	NA	NA	NA	523	93	NA	NA	NA	NA	NA
148	NA	NA	NA	NA	NA	NA	NA	NA	524	4	NA	NA	NA	NA	NA
149	NA	NA	NA	NA	NA	NA	NA	NA	525	40	NA	NA	NA	NA	NA
150	NA	NA	NA	NA	NA	NA	NA	NA	526	123	NA	NA	NA	NA	NA
151	NA	NA	NA	NA	NA	NA	NA	NA	527	41	NA	NA	NA	NA	NA
152	NA	NA	NA	NA	NA	NA	NA	NA	528	47	NA	NA	NA	NA	NA
153	NA	NA	NA	NA	NA	NA	NA	NA	529	15	NA	NA	NA	NA	NA
154	NA	NA	NA	NA	NA	NA	NA	NA	530	6	NA	NA	NA	NA	NA
155	NA	NA	NA	NA	NA	NA	NA	NA	531	99	NA	NA	NA	NA	NA
156	NA	NA	NA	NA	NA	NA	NA	NA	532	60	NA	NA	NA	NA	NA
157	NA	NA	NA	NA	NA	NA	NA	NA	533	64	NA	NA	NA	NA	NA
158	NA	NA	NA	NA	NA	NA	NA	NA	534	120	NA	NA	NA	NA	NA
159	NA	NA	NA	NA	NA	NA	NA	NA	535	91	NA	NA	NA	NA	NA
160	NA	NA	NA	NA	NA	NA	NA	NA	536	119	NA	NA	NA	NA	NA
161	NA	NA	NA	NA	NA	NA	NA	NA	537	21	NA	NA	NA	NA	NA
162	NA	NA	NA	NA	NA	NA	NA	NA	538	14	NA	NA	NA	NA	NA
163	NA	NA	NA	NA	NA	NA	NA	NA	539	48	NA	NA	NA	NA	NA
164	NA	NA	NA	NA	NA	NA	NA	NA	540	39	NA	NA	NA	NA	NA
165	NA	NA	NA	NA	NA	NA	NA	NA	541	82	NA	NA	NA	NA	NA
166	NA	NA	NA	NA	NA	NA	NA	NA	542	21	NA	NA	NA	NA	NA
167	NA	NA	NA	NA	NA	NA	NA	NA	543	109	NA	NA	NA	NA	NA
168	NA	NA	NA	NA	NA	NA	NA	NA	544	NA	NA	NA	NA	NA	NA
169	NA	NA	NA	NA	NA	NA	NA	NA	545	66	NA	NA	NA	NA	NA
170	NA	NA	NA	NA	NA	NA	NA	NA	546	108	NA	NA	NA	NA	NA
171	NA	NA	NA	NA	NA	NA	NA	NA	547	81	NA	NA	NA	NA	NA
172	NA	NA	NA	NA	NA	NA	NA	NA	548	105	NA	NA	NA	NA	NA
173	NA	NA	NA	NA	NA	NA	NA	NA	549	5	NA	NA	NA	NA	NA
174	NA	NA	NA	NA	NA	NA	NA	NA	550	68	NA	NA	NA	NA	NA
175	NA	NA	NA	NA	NA	NA	NA	NA	551	82	NA	NA	NA	NA	NA
176	NA	NA	NA	NA	NA	NA	NA	NA	552	110	NA	NA	NA	NA	NA
177	NA	NA	NA	NA	NA	NA	NA	NA	553	26	NA	NA	NA	NA	NA
178	NA	NA	NA	NA	NA	NA	NA	NA	554	23	NA	NA	NA	NA	NA
179	NA	NA	NA	NA	NA	NA	NA	NA	555	91	NA	NA	NA	NA	NA
180	NA	NA	NA	NA	NA	NA	NA	NA	556	97	NA	NA	NA	NA	NA
181	NA	NA	NA	NA	NA	NA	NA	NA	557	39	NA	NA	NA	NA	NA
182	NA	NA	NA	NA	NA	NA	NA	NA	558	113	NA	NA	NA	NA	NA
183	NA	NA	NA	NA	NA	NA	NA	NA	559	50	NA	NA	NA	NA	NA
184	NA	NA	NA	NA	NA	NA	NA	NA	560	113	NA	NA	NA	NA	NA
185	NA	NA	NA	NA	NA	NA	NA	NA	561	82	NA	NA	NA	NA	NA
186	NA	NA	NA	NA	NA	NA	NA	NA	562	20	NA	NA	NA	NA	NA
187	NA	NA	NA	NA	NA	NA	NA	NA	563	53	NA	NA	NA	NA	NA
188	NA	NA	NA	NA	NA	NA	NA	NA	564	115	NA	NA	NA	NA	NA
189	NA	NA	NA	NA	NA	NA	NA	NA	565	73	NA	NA	NA	NA	NA
190	NA	NA	NA	NA	NA	NA	NA	NA	566	100	NA	NA	NA	NA	NA
191	NA	NA	NA	NA	NA	NA	NA	NA	567	NA	NA	NA	NA	NA	NA
192	NA	NA	NA	NA	NA	NA	NA	NA	568	103	NA	NA	NA	NA	NA
193	NA	NA	NA	NA	NA	NA	NA	NA	569	43	NA	NA	NA	NA	NA
194	NA	NA	NA	NA	NA	NA	NA	NA	570	21	NA	NA	NA	NA	NA
195	NA	NA	NA	NA	NA	NA	NA	NA	571	104	NA	NA	NA	NA	NA
196	NA	NA	NA	NA	NA	NA	NA	NA	572	122	NA	NA	NA	NA	NA
197	NA	NA	NA	NA	NA	NA	NA	NA	573	39	NA	NA	NA	NA	NA
198	NA	NA	NA	NA	NA	NA	NA	NA	574	119	NA	NA	NA	NA	NA
199	NA	NA	NA	NA	NA	NA	NA	NA	575	71	NA	NA	NA	NA	NA
200	NA	NA	NA	NA	NA	NA	NA	NA	576	52	NA	NA	NA	NA	NA
201	NA	NA	NA	NA	NA	NA	NA	NA	577	47	NA	NA	NA	NA	NA
202	NA	NA	NA	NA	NA	NA	NA	NA	578	8	NA	NA	NA	NA	NA
203	NA	NA	NA	NA	NA	NA	NA	NA	579	79	NA	NA	NA	NA	NA
204	NA	NA	NA	NA	NA	NA	NA	NA	580	79	NA	NA	NA	NA	NA
205	NA	NA	NA	NA	NA	NA	NA	NA	581	118	NA	NA	NA	NA	NA
206	NA	NA	NA	NA	NA	NA	NA	NA	582	41	NA	NA	NA	NA	NA
207	NA	NA	NA	NA	NA	NA	NA	NA	583	88	NA	NA	NA	NA	NA
208	NA	NA	NA	NA	NA	NA	NA	NA	584	8	NA	NA	NA	NA	NA
209	NA	NA	NA	NA	NA	NA	NA	NA	585	115	NA	NA	NA	NA	NA
210	NA	NA	NA	NA	NA	NA	NA	NA	586	NA	NA	NA	NA	NA	NA
211	NA	NA	NA	NA	NA	NA	NA	NA	587	115	NA	NA	NA	NA	NA
212	NA	NA	NA	NA	NA	NA	NA	NA	588	101	NA	NA	NA	NA	NA
213	NA	NA	NA	NA	NA	NA	NA	NA	589	96	NA	NA	NA	NA	NA
214	NA	NA	NA	NA	NA	NA	NA	NA	590	82	NA	NA	NA	NA	NA
215	NA	NA	NA	NA	NA	NA	NA	NA	591	106	NA	NA	NA	NA	NA
216	NA	NA	NA	NA	NA	NA	NA	NA	592	54	NA	NA	NA	NA	NA
217	NA	NA	NA	NA	NA	NA	NA	NA	593	115	NA	NA	NA	NA	NA
218	NA	NA	NA	NA	NA	NA	NA	NA	594	102	NA	NA	NA	NA	NA
219	NA	NA	NA	NA	NA	NA	NA	NA	595	100	NA	NA	NA	NA	NA
220	NA	NA	NA	NA	NA	NA	NA	NA	596	105	NA	NA	NA	NA	NA
221	NA	NA	NA	NA	NA	NA	NA	NA	597	89	NA	NA	NA	NA	NA
222	NA	NA	NA	NA	NA	NA	NA	NA	598	42	NA	NA	NA	NA	NA
223	NA	NA	NA	NA	NA	NA	NA	NA	599	83	NA	NA	NA	NA	NA
224	NA	NA	NA	NA	NA	NA	NA	NA	600	26	NA	NA	NA	NA	NA
225	NA	NA	NA	NA	NA	NA	NA	NA	601	51	NA	NA	NA	NA	NA
226	NA	NA	NA	NA	NA	NA	NA	NA	602	50	NA	NA	NA	NA	NA
227	NA	NA	NA	NA	NA	NA	NA	NA	603	11	NA	NA	NA	NA	NA
228	NA	NA	NA	NA	NA	NA	NA	NA	604	79	NA	NA	NA	NA	NA
229	NA	NA	NA	NA	NA	NA	NA	NA	605	115	NA	NA	NA	NA	NA
230	NA	NA	NA	NA	NA	NA	NA	NA	606	45	NA	NA	NA	NA	NA
231	NA	NA	NA	NA	NA	NA	NA	NA	607	124	NA	NA	NA	NA	NA
232	NA	NA	NA	NA	NA	NA	NA	NA	608	72	NA	NA	NA	NA	NA
233	NA	NA	NA	NA	NA	NA	NA	NA	609	55	NA	NA	NA	NA	NA
234	NA	NA	NA	NA	NA	NA	NA	NA	610	94	NA	NA	NA	NA	NA
235	NA	NA	NA	NA	NA	NA	NA	NA	611	NA	NA	NA	NA	NA	NA
236	NA	NA	NA	NA	NA	NA	NA	NA	612	41	NA	NA	NA	NA	NA
237	NA	NA	NA	NA	NA	NA	NA	NA	613	109	NA	NA	NA	NA	NA
238	NA	NA	NA	NA	NA	NA	NA	NA	614	111	NA	NA	NA	NA	NA
239	NA	NA	NA	NA	NA	NA	NA	NA	615	70	NA	NA	NA	NA	NA
240	NA	NA	NA	NA	NA	NA	NA	NA	616	69	NA	NA	NA	NA	NA
241	NA	NA	NA	NA	NA	NA	NA	NA	617	36	NA	NA	NA	NA	NA
242	NA	NA	NA	NA	NA	NA	NA	NA	618	19	NA	NA	NA	NA	NA
243	NA	NA	NA	NA	NA	NA	NA	NA	619	113	NA	NA	NA	NA	NA
244	NA	NA	NA	NA	NA	NA	NA	NA	620	38	NA	NA	NA	NA	NA
245	NA	NA	NA	NA	NA	NA	NA	NA	621	114	NA	NA	NA	NA	NA
246	NA	NA	NA	NA	NA	NA	NA	NA	622	106	NA	NA	NA	NA	NA
247	NA	NA	NA	NA	NA	NA	NA	NA	623	115	NA	NA	NA	NA	NA
248	NA	NA	NA	NA	NA	NA	NA	NA	624	53	NA	NA	NA	NA	NA
249	NA	NA	NA	NA	NA	NA	NA	NA	625	12	NA	NA	NA	NA	NA
250	NA	NA	NA	NA	NA	NA	NA	NA	626	80	NA	NA	NA	NA	NA
251	NA	NA	NA	NA	NA	NA	NA	NA	627	100	NA	NA	NA	NA	NA
252	NA	NA	NA	NA	NA	NA	NA	NA	628	36	NA	NA	NA	NA	NA
253	NA	NA	NA	NA	NA	NA	NA	NA	629	NA	NA	NA	NA	NA	NA
254	NA	NA	NA	NA	NA	NA	NA	NA	630	83	NA	NA	NA	NA	NA
255	NA	NA	NA	NA	NA	NA	NA	NA	631	85	NA	NA	NA	NA	NA
256	NA	NA	NA	NA	NA	NA	NA	NA	632	107	NA	NA	NA	NA	NA
257	NA	NA	NA	NA	NA	NA	NA	NA	633	30	NA	NA	NA	NA	NA
258	NA	NA	NA	NA	NA	NA	NA	NA	634	21	NA	NA	NA	NA	NA
259	NA	NA	NA	NA	NA	NA	NA	NA	635	31	NA	NA	NA	NA	NA
260	NA	NA	NA	NA	NA	NA	NA	NA	636	13	NA	NA	NA	NA	NA
261	NA	NA	NA	NA	NA	NA	NA	NA	637	80	NA	NA	NA	NA	NA
262	NA	NA	NA	NA	NA	NA	NA	NA	638	38	NA	NA	NA	NA	NA
263	NA	NA	NA	NA	NA	NA	NA	NA	639	105	NA	NA	NA	NA	NA
264	NA	NA	NA	NA	NA	NA	NA	NA	640	54	NA	NA	NA	NA	NA
265	NA	NA	NA	NA	NA	NA	NA	NA	641	119	NA	NA	NA	NA	NA
266	NA	NA	NA	NA	NA	NA	NA	NA	642	123	NA	NA	NA	NA	NA
267	NA	NA	NA	NA	NA	NA	NA	NA	643	17	NA	NA	NA	NA	NA
268	NA	NA	NA	NA	NA	NA	NA	NA	644	112	NA	NA	NA	NA	NA
269	NA	NA	NA	NA	NA	NA	NA	NA	645	98	NA	NA	NA	NA	NA
270	NA	NA	NA	NA	NA	NA	NA	NA	646	33	NA	NA	NA	NA	NA
271	NA	NA	NA	NA	NA	NA	NA	NA	647	110	NA	NA	NA	NA	NA
272	NA	NA	NA	NA	NA	NA	NA	NA	648	73	NA	NA	NA	NA	NA
273	NA	NA	NA	NA	NA	NA	NA	NA	649	118	NA	NA	NA	NA	NA
274	NA	NA	NA	NA	NA	NA	NA	NA	650	121	NA	NA	NA	NA	NA
275	NA	NA	NA	NA	NA	NA	NA	NA	651	43	NA	NA	NA	NA	NA
276	NA	NA	NA	NA	NA	NA	NA	NA	652	82	NA	NA	NA	NA	NA
277	NA	NA	NA	NA	NA	NA	NA	NA	653	82	NA	NA	NA	NA	NA
278	NA	NA	NA	NA	NA	NA	NA	NA	654	22	NA	NA	NA	NA	NA
279	NA	NA	NA	NA	NA	NA	NA	NA	655	22	NA	NA	NA	NA	NA
280	NA	NA	NA	NA	NA	NA	NA	NA	656	NA	NA	NA	NA	NA	NA
281	NA	NA	NA	NA	NA	NA	NA	NA	657	NA	NA	NA	NA	NA	NA
282	NA	NA	NA	NA	NA	NA	NA	NA	658	NA	NA	NA	NA	NA	NA
283	NA	NA	NA	NA	NA	NA	NA	NA	659	NA	NA	NA	NA	NA	NA
284	NA	NA	NA	NA	NA	NA	NA	NA	701	92	NA	NA	NA	NA	NA
285	NA	NA	NA	NA	NA	NA	NA	NA	702	NA	NA	NA	NA	NA	NA
286	NA	NA	NA	NA	NA	NA	NA	NA	703	NA	NA	NA	NA	NA	NA
287	NA	NA	NA	NA	NA	NA	NA	NA	704	94	NA	NA	NA	NA	NA
288	NA	NA	NA	NA	NA	NA	NA	NA	705	61	NA	NA	NA	NA	NA
289	NA	NA	NA	NA	NA	NA	NA	NA	706	79	NA	NA	NA	NA	NA
290	NA	NA	NA	NA	NA	NA	NA	NA	707	86	NA	NA	NA	NA	NA
291	NA	NA	NA	NA	NA	NA	NA	NA	708	83	NA	NA	NA	NA	NA
292	NA	NA	NA	NA	NA	NA	NA	NA	709	58	NA	NA	NA	NA	NA
293	NA	NA	NA	NA	NA	NA	NA	NA	710	63	NA	NA	NA	NA	NA
294	NA	NA	NA	NA	NA	NA	NA	NA	711	74	NA	NA	NA	NA	NA
295	NA	NA	NA	NA	NA	NA	NA	NA	712	NA	NA	NA	NA	NA	NA
296	NA	NA	NA	NA	NA	NA	NA	NA	713	75	NA	NA	NA	NA	NA
297	NA	NA	NA	NA	NA	NA	NA	NA	714	65	NA	NA	NA	NA	NA
298	NA	NA	NA	NA	NA	NA	NA	NA	715	78	NA	NA	NA	NA	NA
299	NA	NA	NA	NA	NA	NA	NA	NA	716	62	NA	NA	NA	NA	NA
300	NA	NA	NA	NA	NA	NA	NA	NA	717	87	NA	NA	NA	NA	NA
301	NA	NA	NA	NA	NA	NA	NA	NA	718	62	NA	NA	NA	NA	NA
302	NA	NA	NA	NA	NA	NA	NA	NA	719	84	NA	NA	NA	NA	NA
303	NA	NA	NA	NA	NA	NA	NA	NA	720	56	NA	NA	NA	NA	NA
304	NA	NA	NA	NA	NA	NA	NA	NA	721	61	NA	NA	NA	NA	NA
305	NA	NA	NA	NA	NA	NA	NA	NA	722	80	NA	NA	NA	NA	NA
306	NA	NA	NA	NA	NA	NA	NA	NA	723	49	NA	NA	NA	NA	NA
307	NA	NA	NA	NA	NA	NA	NA	NA	724	80	NA	NA	NA	NA	NA
308	NA	NA	NA	NA	NA	NA	NA	NA	725	63	NA	NA	NA	NA	NA
309	NA	NA	NA	NA	NA	NA	NA	NA	726	NA	NA	NA	NA	NA	NA
310	NA	NA	NA	NA	NA	NA	NA	NA	727	78	NA	NA	NA	NA	NA
311	NA	NA	NA	NA	NA	NA	NA	NA	728	56	NA	NA	NA	NA	NA
312	NA	NA	NA	NA	NA	NA	NA	NA	729	63	NA	NA	NA	NA	NA
313	NA	NA	NA	NA	NA	NA	NA	NA	730	74	NA	NA	NA	NA	NA
314	NA	NA	NA	NA	NA	NA	NA	NA	731	76	NA	NA	NA	NA	NA
315	NA	NA	NA	NA	NA	NA	NA	NA	732	94	NA	NA	NA	NA	NA
316	NA	NA	NA	NA	NA	NA	NA	NA	733	75	NA	NA	NA	NA	NA
317	NA	NA	NA	NA	NA	NA	NA	NA	734	95	NA	NA	NA	NA	NA
318	NA	NA	NA	NA	NA	NA	NA	NA	735	71	NA	NA	NA	NA	NA
319	NA	NA	NA	NA	NA	NA	NA	NA	736	49	NA	NA	NA	NA	NA
320	NA	NA	NA	NA	NA	NA	NA	NA	737	59	NA	NA	NA	NA	NA
321	NA	NA	NA	NA	NA	NA	NA	NA	738	58	NA	NA	NA	NA	NA
322	NA	NA	NA	NA	NA	NA	NA	NA	739	49	NA	NA	NA	NA	NA
323	NA	NA	NA	NA	NA	NA	NA	NA	740	57	NA	NA	NA	NA	NA
324	NA	NA	NA	NA	NA	NA	NA	NA	741	59	NA	NA	NA	NA	NA
325	NA	NA	NA	NA	NA	NA	NA	NA	742	94	NA	NA	NA	NA	NA
326	NA	NA	NA	NA	NA	NA	NA	NA	743	67	NA	NA	NA	NA	NA
327	NA	NA	NA	NA	NA	NA	NA	NA	744	94	NA	NA	NA	NA	NA
328	NA	NA	NA	NA	NA	NA	NA	NA	745	74	NA	NA	NA	NA	NA
329	NA	NA	NA	NA	NA	NA	NA	NA	746	59	NA	NA	NA	NA	NA
330	NA	NA	NA	NA	NA	NA	NA	NA	747	NA	NA	NA	NA	NA	NA
331	NA	NA	NA	NA	NA	NA	NA	NA	748	77	NA	NA	NA	NA	NA
332	NA	NA	NA	NA	NA	NA	NA	NA	749	61	NA	NA	NA	NA	NA
333	NA	NA	NA	NA	NA	NA	NA	NA	750	77	NA	NA	NA	NA	NA
334	NA	NA	NA	NA	NA	NA	NA	NA	751	94	NA	NA	NA	NA	NA
335	NA	NA	NA	NA	NA	NA	NA	NA	752	62	NA	NA	NA	NA	NA
336	NA	NA	NA	NA	NA	NA	NA	NA	753	NA	NA	NA	NA	NA	NA
337	NA	NA	NA	NA	NA	NA	NA	NA	801	7	NA	NA	NA	NA	NA
338	NA	NA	NA	NA	NA	NA	NA	NA	802	24	NA	NA	NA	NA	NA
339	NA	NA	NA	NA	NA	NA	NA	NA	803	25	NA	NA	NA	NA	NA
340	NA	NA	NA	NA	NA	NA	NA	NA	804	32	NA	NA	NA	NA	NA
341	NA	NA	NA	NA	NA	NA	NA	NA	805	27	NA	NA	NA	NA	NA
342	NA	NA	NA	NA	NA	NA	NA	NA	806	1	NA	NA	NA	NA	NA
343	NA	NA	NA	NA	NA	NA	NA	NA	807	2	NA	NA	NA	NA	NA
344	NA	NA	NA	NA	NA	NA	NA	NA	808	46	NA	NA	NA	NA	NA
345	NA	NA	NA	NA	NA	NA	NA	NA	809	28	NA	NA	NA	NA	NA
346	NA	NA	NA	NA	NA	NA	NA	NA	810	5	NA	NA	NA	NA	NA
347	NA	NA	NA	NA	NA	NA	NA	NA	811	25	NA	NA	NA	NA	NA
348	NA	NA	NA	NA	NA	NA	NA	NA	812	9	NA	NA	NA	NA	NA
349	NA	NA	NA	NA	NA	NA	NA	NA	813	30	NA	NA	NA	NA	NA
350	NA	NA	NA	NA	NA	NA	NA	NA	814	24	NA	NA	NA	NA	NA
351	NA	NA	NA	NA	NA	NA	NA	NA	815	30	NA	NA	NA	NA	NA
352	NA	NA	NA	NA	NA	NA	NA	NA	816	24	NA	NA	NA	NA	NA
353	NA	NA	NA	NA	NA	NA	NA	NA	817	46	NA	NA	NA	NA	NA
354	NA	NA	NA	NA	NA	NA	NA	NA	818	35	NA	NA	NA	NA	NA
355	NA	NA	NA	NA	NA	NA	NA	NA	819	44	NA	NA	NA	NA	NA
356	NA	NA	NA	NA	NA	NA	NA	NA	820	34	NA	NA	NA	NA	NA
357	NA	NA	NA	NA	NA	NA	NA	NA	821	2	NA	NA	NA	NA	NA
358	NA	NA	NA	NA	NA	NA	NA	NA	822	35	NA	NA	NA	NA	NA
359	NA	NA	NA	NA	NA	NA	NA	NA	823	18	NA	NA	NA	NA	NA
360	NA	NA	NA	NA	NA	NA	NA	NA	824	36	NA	NA	NA	NA	NA
361	NA	NA	NA	NA	NA	NA	NA	NA	825	9	NA	NA	NA	NA	NA
362	NA	NA	NA	NA	NA	NA	NA	NA	826	32	NA	NA	NA	NA	NA
363	NA	NA	NA	NA	NA	NA	NA	NA	827	20	NA	NA	NA	NA	NA
364	NA	NA	NA	NA	NA	NA	NA	NA	828	2	NA	NA	NA	NA	NA
365	NA	NA	NA	NA	NA	NA	NA	NA	829	29	NA	NA	NA	NA	NA
366	NA	NA	NA	NA	NA	NA	NA	NA	830	37	NA	NA	NA	NA	NA
367	NA	NA	NA	NA	NA	NA	NA	NA	831	3	NA	NA	NA	NA	NA
368	NA	NA	NA	NA	NA	NA	NA	NA	832	46	NA	NA	NA	NA	NA
369	NA	NA	NA	NA	NA	NA	NA	NA	833	28	NA	NA	NA	NA	NA
370	NA	NA	NA	NA	NA	NA	NA	NA	834	44	NA	NA	NA	NA	NA
371	NA	NA	NA	NA	NA	NA	NA	NA	835	10	NA	NA	NA	NA	NA
372	NA	NA	NA	NA	NA	NA	NA	NA	836	18	NA	NA	NA	NA	NA
373	NA	NA	NA	NA	NA	NA	NA	NA	837	5	NA	NA	NA	NA	NA
374	NA	NA	NA	NA	NA	NA	NA	NA	838	NA	NA	NA	NA	NA	NA
375	NA	NA	NA	NA	NA	NA	NA	NA	839	NA	NA	NA	NA	NA	NA
376	NA	NA	NA	NA	NA	NA	NA	NA	901	NA	NA	NA	NA	NA	NA
377	NA	NA	NA	NA	NA	NA	NA	NA	902	NA	NA	NA	NA	NA	NA
378	NA	NA	NA	NA	NA	NA	NA	NA	903	NA	NA	NA	NA	NA	NA
379	NA	NA	NA	NA	NA	NA	NA	NA	904	NA	NA	NA	NA	NA	NA
380	1	LC249	yes	1	1	10	NA	1	732	315	NA	16.1067	41.5764	15.8681	73.5398
381	1	LC130	yes	1	5	192	NA	2	831	367	NA	10.6072	43.5923	11.3181	12.7218
382	2	DP542	yes	2	3	NA	19	2	805	341	NA	16.5319	47.1362	15.8497	69.2045
383	2	LC462	yes	2	2	NA	1	1	513	137	NA	8.3716	48.2481	3.3655	-8.9475
384	1	LC266	yes	1	3	182	NA	2	557	181	NA	9.3132	49.1337	8.6893	3.7487
385	1	LC259	yes	1	4	115	NA	2	552	176	NA	15.7832	49.8425	14.6548	57.8866
386	2	LC518	yes	2	1	NA	5	1	560	184	NA	17.9939	48.2481	8.6958	45.5319
387	2	LC486	yes	2	1	NA	13	1	541	165	NA	5.2775	50.3508	5.8904	-10.4608
388	2	DP505	yes	2	1	NA	13	4	541	165	NA	16.3279	46.2555	14.8678	63.5836
389	1	LC098	yes	1	5	60	NA	3	808	344	NA	8.6662	45.4149	13.5426	9.2323
390	1	LC247	yes	1	2	91	NA	4	548	172	NA	15.7832	42.1011	11.217	44.6263
391	1	LC224	yes	1	1	120	NA	4	808	344	NA	9.0976	44.6601	10.4082	8.2353
392	2	LC469	yes	2	4	NA	17	3	805	NA	NA	6.7736	44.4611	7.4334	-6.137
393	1	LC197	yes	1	2	200	NA	4	524	148	NA	15.5675	48.1396	11.7226	46.5206
394	1	LC068	yes	1	3	218	NA	4	541	165	NA	13.95	47.9371	11.8237	35.2544
395	1	LC148	yes	1	6	188	NA	4	741	324	NA	12.9795	50.4501	9.3971	16.2114
396	2	LC489	yes	2	2	NA	9	3	548	172	NA	20.374	47.9178	10.6596	66.286
397	2	LC519	yes	2	1	NA	10	2	582	206	NA	17.6199	47.2463	13.7456	67.475
398	1	LC250	yes	1	1	226	NA	2	559	183	NA	15.0284	43.5647	15.0592	59.9803
399	1	LC051	yes	1	4	199	NA	1	510	134	NA	14.9205	45.8107	15.6659	56.2914
400	2	LC443	yes	2	1	NA	33	1	741	324	NA	4.3595	44.351	6.4515	-11.866
401	2	LC475	yes	2	3	NA	9	4	582	206	NA	15.7839	48.2371	15.4289	62.1784
402	1	LC220	yes	1	1	180	NA	3	513	137	NA	12.9795	48.1028	14.857	43.5296
403	1	LC216	yes	1	2	168	NA	4	563	187	NA	18.5868	46.6392	11.217	32.6621
404	1	LC063	yes	1	3	130	NA	4	513	137	NA	12.0091	44.6693	11.6215	23.2902
405	1	LC054	yes	1	4	120	NA	4	813	349	NA	13.4109	47.3848	14.6548	39.9403
406	1	LC065	yes	1	4	137	NA	2	563	187	NA	15.4597	46.0869	14.2503	53.7989
407	1	LC273	yes	1	1	5	NA	3	524	148	NA	12.3325	47.7162	11.6215	26.7797
408	2	LC049	yes	2	2	NA	1	3	513	137	NA	11.8737	45.9253	6.732	9.2123
409	2	LC135	yes	2	2	NA	27	3	817	353	NA	7.9976	44.8134	8.9764	1.2134
410	1	LC244	yes	1	5	144	NA	4	741	324	NA	18.3712	44.0894	14.5537	77.7272
411	1	LC283	yes	1	2	146	NA	2	811	347	NA	10.4994	49.3086	10.8126	14.9153
412	1	LC242	yes	1	2	80	NA	3	817	353	NA	13.303	47.2375	14.0481	42.1338
413	1	LC055	yes	1	4	36	NA	3	548	172	NA	8.3428	46.8233	8.7904	-0.2394
414	1	LC217	yes	1	2	157	NA	1	523	147	NA	13.4109	46.5655	12.8348	37.9463
415	1	LC132	yes	1	5	143	NA	3	548	172	NA	10.8229	49.1614	13.8459	20.6979
416	1	LC286	yes	1	5	143	NA	2	548	172	NA	10.3916	44.5036	13.5426	17.7069
417	2	LC436	yes	2	4	NA	13	4	817	353	NA	9.7317	47.8518	9.9583	8.5638
418	1	LC200	yes	1	2	76	NA	3	741	323	NA	15.0284	47.9463	11.217	18.6042
419	1	LC023	yes	1	3	145	NA	2	561	185	NA	15.7832	47.4584	12.5315	49.9105
420	1	LC271	yes	1	1	221	NA	1	511	NA	NA	NA	NA	NA	NA
421	2	LC477	yes	2	3	NA	10	3	808	344	NA	8.9497	40.7952	11.9221	12.9956
422	1	LC227	yes	1	1	172	NA	4	563	187	NA	7.0488	44.4944	9.8015	-0.04
423	2	LC043	yes	2	2	NA	33	3	741	324	NA	4.8695	47.7197	8.5556	-9.0555
424	2	LC405	yes	2	4	NA	8	4	541	165	NA	17.4839	49.5141	13.1845	58.7194
425	1	LC275	yes	1	1	33	NA	4	510	NA	NA	NA	NA	NA	NA
426	1	LC025	yes	1	3	130	NA	2	513	NA	NA	NA	NA	NA	NA
427	1	LC031	yes	1	4	137	NA	4	563	NA	NA	NA	NA	NA	NA
428	2	DP515	yes	2	2	NA	17	2	557	181	NA	11.7037	45.9913	9.1167	15.2656
429	1	LC278	yes	1	2	168	NA	1	563	187	NA	10.3916	41.9722	9.8015	11.4257
430	1	LC038	yes	1	3	224	NA	3	582	206	NA	12.3325	47.4952	11.3181	24.2872
431	1	LC225	yes	1	1	134	NA	3	582	206	NA	14.7049	45.3229	14.857	56.7899
432	2	DP549	yes	2	1	NA	12	2	817	353	NA	12.6558	42.4355	12.904	33.6416
433	1	LC257	yes	1	2	189	NA	1	732	315	NA	17.7242	48.8392	14.5537	80.1201
434	1	LC202	yes	1	3	97	NA	1	548	172	NA	11.0386	48.609	12.4303	20.9971
435	2	LC334	yes	2	3	NA	5	2	523	147	NA	9.8677	45.0115	10.2388	12.8875
436	2	DP522	yes	2	1	NA	1	3	811	347	NA	13.4038	47.2023	11.5013	32.8849
437	2	LC408	yes	2	1	NA	19	3	561	185	NA	12.1118	45.4959	13.6054	32.7768
438	1	LC042	yes	1	3	182	NA	4	557	181	NA	8.5584	48.112	8.9926	2.2532
439	1	LC210	yes	1	5	135	NA	3	559	183	NA	12.7639	47.5505	13.5426	30.6681
440	1	LC218	yes	1	2	146	NA	4	811	347	NA	7.1566	47.7806	8.5882	-2.034
441	2	LC336	yes	2	3	NA	9	2	563	187	NA	11.7377	42.1603	10.2388	20.8865
442	1	LC092	yes	1	5	87	NA	1	817	353	NA	8.0193	48.3237	12.127	3.9481
443	1	LC041	yes	1	4	193	NA	2	513	137	NA	13.0874	47.4768	12.127	28.6741
444	2	LC499	yes	2	4	NA	14	4	732	315	NA	7.1476	48.3252	11.9221	2.6186
445	1	LC178	yes	1	4	119	NA	2	805	341	NA	17.6163	45.4701	15.2614	77.3284
446	1	LC192	yes	1	2	215	NA	4	547	171	NA	13.7344	49.8609	12.6326	38.7439
447	1	LC019	yes	1	5	65	NA	4	510	134	NA	7.9114	46.0593	11.8237	2.9511
448	1	LC017	yes	1	3	223	NA	4	563	187	NA	8.8819	48.4249	12.127	9.9302
449	1	LC039	yes	1	3	224	NA	4	582	206	NA	9.6367	47.3848	9.8015	7.7367
450	1	LC215	yes	1	1	88	NA	1	560	184	NA	12.0091	48.7747	11.6215	25.3839
451	1	LC234	yes	1	2	147	NA	2	557	181	NA	12.0091	46.363	11.8237	25.3839
452	1	LC066	yes	1	3	112	NA	4	552	176	NA	15.3519	46.8509	12.8348	48.7141
453	2	LC332	yes	2	2	NA	28	3	548	171	NA	8.3716	41.1034	10.0986	4.6724
454	1	LC204	yes	1	4	150	NA	4	523	147	NA	15.4597	48.7747	15.2614	58.7839
455	1	LC060	yes	1	5	135	NA	2	559	183	NA	15.5675	45.2584	14.5537	54.1977
456	1	LC214	yes	1	1	226	NA	3	560	183	NA	9.8524	49.0601	12.4303	16.9093
457	1	LC059	yes	1	3	80	NA	4	524	148	NA	8.9897	47.081	10.8126	7.637
458	1	LC213	yes	1	1	88	NA	4	560	184	NA	10.1759	47.1362	10.8126	13.7188
459	2	LC516	yes	2	4	NA	14	4	563	187	NA	13.2338	43.8997	11.7818	29.1016
460	1	LC088	yes	1	4	137	NA	1	563	187	NA	15.4597	48.9128	14.5537	55.2944
461	2	LC037	yes	2	3	NA	10	2	510	134	NA	7.1136	46.9601	9.5375	0.9972
462	2	DP555	yes	2	1	NA	16	2	839	375	NA	15.9539	45.7161	14.8678	61.0975
463	1	LC102	yes	1	3	224	NA	1	582	NA	NA	NA	NA	NA	NA
464	2	LC347	yes	2	2	NA	8	1	808	344	NA	11.1257	37.5366	11.0805	18.2922
465	2	LC494	yes	2	4	NA	5	2	511	135	NA	13.6078	50.4058	10.0986	25.5345
466	2	LC378	yes	2	2	NA	14	2	561	185	NA	18.504	48.105	14.0262	71.3664
467	1	LC252	yes	1	1	115	NA	3	741	324	NA	20.0965	40.9321	13.037	90.6884
468	1	LC152	yes	1	5	181	NA	1	552	176	NA	13.95	52.0241	14.0481	40.3391
469	2	LC463	yes	2	2	NA	9	1	548	172	NA	10.5817	46.4427	10.2388	13.6442
470	2	DP528	yes	2	1	NA	12	4	817	353	NA	13.4038	45.3308	13.8859	40.992
471	1	LC206	yes	1	2	161	NA	4	541	165	NA	10.3916	43.2978	9.2959	9.9302
472	1	LC277	yes	1	1	42	NA	1	561	185	NA	11.2542	45.3137	9.7004	15.015
473	1	LC231	yes	1	2	168	NA	3	563	187	NA	15.4597	45.7279	11.8237	46.2215
474	1	LC131	yes	1	6	129	NA	2	557	181	NA	7.5879	47.348	10.0037	-1.7349
475	2	LC020	yes	2	2	NA	33	4	741	324	NA	9.4937	48.0169	8.8361	6.0776
476	1	LC014	yes	1	3	23	NA	3	510	134	NA	18.0477	46.9245	13.2392	71.446
477	1	LC290	yes	1	2	91	NA	2	548	172	NA	8.0193	45.8844	9.5993	2.652
478	2	DP521	yes	2	4	NA	14	3	513	137	NA	12.3158	48.0059	12.0624	25.3184
479	2	LC440	yes	2	1	NA	44	2	510	134	NA	10.0717	46.4537	13.1845	21.1027
480	1	LC245	yes	1	5	65	NA	2	510	134	NA	12.8717	45.1756	13.037	29.6711
481	2	LC456	yes	2	1	NA	35	1	559	183	NA	8.0316	47.3234	12.904	11.158
482	1	LC228	yes	1	1	80	NA	3	552	176	NA	12.0091	47.0534	13.4414	31.8645
483	1	LC268	yes	1	1	10	NA	2	732	315	NA	9.0976	45.1572	11.6215	11.1266
484	2	LC507	yes	2	1	NA	1	1	811	NA	NA	NA	NA	NA	NA
485	1	LC129	yes	1	5	60	NA	1	808	344	NA	11.6856	46.9061	13.2392	23.3899
486	1	LC199	yes	1	2	214	NA	3	560	184	NA	13.4109	48.6827	11.5204	32.363
487	2	LC371	yes	2	1	NA	15	2	732	315	NA	12.2818	43.074	13.0443	32.1283
488	2	LC356	yes	2	2	NA	14	3	561	185	NA	15.7499	45.1436	11.9221	44.451
489	2	LC144	yes	2	3	NA	10	3	839	375	NA	8.7797	48.9306	10.2388	8.4557
490	2	DP517	yes	2	1	NA	12	3	817	353	NA	9.5277	51.4186	12.6234	17.1032
491	2	DP501	yes	2	1	NA	16	4	839	375	NA	16.1579	47.6426	15.5692	65.3131
492	1	LC097	yes	1	5	144	NA	1	741	324	NA	8.9897	46.9153	11.5204	6.4406
493	2	LC375	yes	2	1	NA	33	2	513	137	NA	12.2818	47.4445	9.818	22.0755
494	2	LC496	yes	2	2	NA	26	3	541	165	NA	10.9557	49.5141	17.1121	33.2092
495	2	LC397	yes	2	3	NA	14	1	552	175	NA	13.0298	50.7911	13.6054	37.9654
496	1	LC243	yes	1	1	186	NA	4	532	156	NA	15.7832	43.0768	13.947	60.5786
497	2	LC381	yes	2	1	NA	39	3	557	NA	NA	NA	NA	NA	NA
498	2	LC360	yes	2	1	NA	19	3	524	148	NA	10.0717	48.7545	14.3067	24.0212
499	2	LC136	yes	2	3	NA	19	4	732	315	NA	3.0675	43.9547	8.6958	-12.1903
500	2	LC515	yes	2	4	NA	13	3	817	353	NA	9.9357	47.0922	10.0986	9.6447
501	2	DP514	yes	2	1	NA	11	4	803	339	NA	15.7839	49.1508	14.8678	59.8004
502	1	LC208	yes	1	2	215	NA	2	547	171	NA	11.0386	49.907	10.8126	17.3081
503	1	LC209	yes	1	5	65	NA	3	510	134	NA	12.5482	48.7655	14.2503	32.2633
504	1	LC160	yes	1	2	179	NA	4	552	176	NA	9.9602	55.9731	11.0148	13.1206
505	2	LC450	yes	2	4	NA	8	1	541	165	NA	12.3158	45.1987	13.7456	30.1826
506	1	LC121	yes	1	5	115	NA	1	541	165	NA	14.3814	47.1362	14.5537	45.2245
507	1	LC260	yes	1	2	161	NA	1	541	165	NA	9.6367	50.9195	8.4871	5.4436
508	1	LC258	yes	1	1	188	NA	4	557	181	NA	14.3814	47.9923	14.5537	52.2036
509	2	LC505	yes	2	3	NA	13	3	511	135	NA	20.034	46.9491	14.3067	87.6886
510	2	LC370	yes	2	1	NA	35	4	559	183	NA	10.2417	45.8812	15.4289	27.8045
511	1	LC194	yes	1	5	115	NA	2	541	165	NA	14.1657	48.066	14.857	45.5236
512	2	LC429	yes	2	2	NA	21	4	559	183	NA	8.7456	44.8244	9.818	5.4291
513	2	LC490	yes	2	2	NA	9	1	813	349	NA	8.5416	50.615	10.0986	5.321
514	2	LC480	yes	2	1	NA	41	1	805	341	NA	16.1579	46.894	16.8316	70.7178
515	1	LC179	yes	1	4	120	NA	2	813	349	NA	13.5187	48.9865	10.6104	25.0848
516	2	DP531	yes	2	2	NA	7	1	523	147	NA	13.3358	48.3692	9.1167	22.2917
517	2	LC473	yes	2	3	NA	5	4	523	147	NA	15.0359	46.6628	8.6958	30.8311
518	1	LC045	yes	1	3	130	NA	3	513	137	NA	12.656	46.5011	12.0259	28.2753
519	1	LC280	yes	1	2	80	NA	4	817	353	NA	12.1169	46.0777	11.1159	23.5893
520	1	LC285	yes	1	5	181	NA	4	552	176	NA	14.4892	45.4701	13.037	39.6412
521	2	LC351	yes	2	4	NA	7	3	741	324	NA	8.2696	45.573	8.8361	0.8891
522	2	DP550	yes	2	2	NA	17	4	557	181	NA	12.4178	46.7839	11.6415	25.8588
523	1	LC241	yes	1	1	29	NA	2	831	367	NA	14.0579	44.4116	15.0592	52.5027
524	2	LC389	yes	2	1	NA	19	1	561	185	NA	10.9897	41.4998	12.2026	23.0484
525	1	LC181	yes	1	2	157	NA	3	523	147	NA	12.8717	47.6885	12.3292	32.5624
526	2	LC467	yes	2	4	NA	15	4	557	181	NA	8.9837	47.1142	8.8361	3.3753
527	2	LC396	yes	2	2	NA	27	2	510	134	NA	13.1658	47.1802	12.6234	32.7768
528	1	LC018	yes	1	3	80	NA	1	524	148	NA	13.303	48.5078	12.8348	35.4538
529	1	LC127	yes	1	6	217	NA	2	561	184	NA	9.5289	48.876	NA	NA
530	1	LC205	yes	1	2	210	NA	3	510	134	NA	17.7242	49.64	13.2392	71.446
531	1	LC165	yes	1	2	215	NA	1	547	171	NA	9.5289	47.0718	11.4193	12.4227
532	1	LC255	yes	1	1	74	NA	3	803	339	NA	17.2928	40.886	15.767	84.2078
533	1	LC188	yes	1	2	214	NA	4	560	184	NA	14.8127	47.5044	11.5204	40.3391
534	1	LC233	yes	1	1	172	NA	2	563	187	NA	13.6265	43.9053	12.127	36.5505
535	1	LC170	yes	1	4	176	NA	4	524	148	NA	8.7741	47.0718	14.2503	11.9242
536	1	LC035	yes	1	4	81	NA	1	557	181	NA	20.6356	46.5563	11.7226	77.8269
537	1	LC281	yes	1	1	86	NA	1	901	376	NA	NA	47.1455	10.0037	35.8526
538	2	LC478	yes	2	2	NA	1	4	513	137	NA	12.0438	46.883	6.4515	8.9962
539	2	DP538	yes	2	1	NA	10	4	813	349	NA	10.6157	47.8408	11.0805	18.2922
540	2	LC464	yes	2	4	NA	7	3	560	184	NA	17.6539	47.3454	8.6958	39.803
541	1	LC056	yes	1	4	125	NA	1	532	156	NA	16.8615	45.1848	15.2614	70.1499
542	1	LC143	yes	1	6	12	NA	3	813	349	NA	15.1362	45.8568	14.2503	47.8168
543	2	LC388	yes	2	1	NA	39	1	557	181	NA	12.2818	47.8298	11.361	26.8317
544	2	LC033	yes	2	2	NA	31	2	560	184	NA	6.5356	46.9381	9.5375	-2.678
545	2	LC312	yes	2	2	NA	20	1	510	NA	NA	12.0438	45.8152	11.5013	23.6969
546	2	DP507	yes	2	1	NA	9	1	552	176	NA	13.4038	47.3013	15.8497	47.6938
547	1	LC016	yes	1	5	192	NA	4	831	367	NA	17.2928	46.0132	13.5426	62.4729
548	1	LC105	yes	1	4	81	NA	3	557	181	NA	14.3814	48.6827	11.8237	35.2544
549	2	LC484	yes	2	4	NA	11	1	813	349	NA	12.3158	48.7655	14.5873	32.6687
550	1	LC027	yes	1	3	224	NA	2	582	206	NA	15.3519	47.1362	11.217	40.5386
551	1	LC070	yes	1	3	112	NA	2	552	176	NA	12.1169	47.6149	11.4193	23.2902
552	1	LC174	yes	1	4	87	NA	3	741	324	NA	17.0772	48.5906	13.1381	60.1798
553	1	LC106	yes	1	5	69	NA	2	557	180	NA	15.9988	47.9003	14.4525	56.8896
554	1	LC158	yes	1	5	159	NA	4	524	148	NA	13.5187	47.5321	14.2503	38.3451
555	2	LC500	yes	2	4	NA	11	4	559	183	NA	9.3577	48.5894	11.2207	9.8609
556	1	LC109	yes	1	5	65	NA	1	563	186	NA	17.9398	47.4032	12.7337	18.4048
557	2	LC513	yes	2	2	NA	17	1	557	181	NA	14.6278	48.5784	9.1167	28.1288
558	2	LC438	yes	2	4	NA	1	4	524	148	NA	14.7298	49.393	17.6732	57.8547
559	1	LC274	yes	1	1	86	NA	4	901	376	NA	NA	45.7647	12.7337	48.2156
560	2	LC400	yes	2	2	NA	13	3	547	171	NA	10.7857	48.7215	6.5918	5.1048
561	2	LC362	yes	2	4	NA	13	2	817	353	NA	6.9776	46.2885	8.5556	-3.7589
562	2	LC403	yes	2	2	NA	21	4	563	187	NA	13.1658	46.6078	10.9402	27.3721
563	1	LC154	yes	1	5	83	NA	1	511	135	NA	15.6754	49.2442	13.947	52.3033
564	1	LC028	yes	1	3	130	NA	1	808	343	NA	9.9602	46.6484	10.6104	10.9272
565	1	LC237	yes	1	1	120	NA	1	808	344	NA	13.0874	41.6132	12.4303	34.5565
566	1	LC086	yes	1	4	191	NA	3	511	NA	NA	17.0772	47.6425	15.2614	72.443
567	1	LC032	yes	1	3	221	NA	1	532	156	NA	14.8127	47.3388	13.2392	46.9194
568	1	LC021	yes	1	6	98	NA	2	817	353	NA	7.6958	48.2685	9.9026	-1.4358
569	2	LC420	yes	2	4	NA	17	4	523	147	NA	9.5617	47.4665	8.6958	4.9967
570	1	LC184	yes	1	4	122	NA	4	582	206	NA	14.9205	46.63	14.2503	49.8108
571	2	LC380	yes	2	2	NA	26	2	541	165	NA	12.2478	46.6298	16.8316	40.3434
572	1	LC207	yes	1	2	197	NA	4	563	186	NA	13.7344	48.4894	13.037	76.7302
573	1	LC288	yes	1	1	115	NA	4	741	324	NA	15.9988	45.8568	11.4193	47.5177
574	2	LC348	yes	2	2	NA	14	1	561	185	NA	7.6236	41.786	9.5375	0.9972
575	2	LC337	yes	2	2	NA	21	2	559	183	NA	18.504	47.9839	15.7094	79.4735
576	1	LC240	yes	1	1	188	NA	2	557	181	NA	15.244	43.6383	15.0592	62.1738
577	2	LC322	yes	2	2	NA	22	1	805	341	NA	17.5859	50.648	14.0262	64.9889
578	2	LC495	yes	2	1	NA	43	2	547	171	NA	9.8677	47.7967	14.3067	23.0484
579	2	LC442	yes	2	2	NA	13	2	547	171	NA	13.9138	46.2005	11.6415	33.4254
580	2	DP502	yes	2	4	NA	11	2	805	341	NA	16.9399	47.0922	15.7094	65.9617
581	2	DP503	yes	2	4	NA	14	2	563	187	NA	10.8537	44.7693	10.0986	13.3199
582	2	LC349	yes	2	4	NA	11	4	805	341	NA	10.8537	42.4245	11.7818	17.5356
583	2	LC359	yes	2	2	NA	21	1	732	315	NA	14.6278	49.7122	15.4289	51.0447
584	1	LC211	yes	1	2	197	NA	3	831	NA	NA	NA	NA	NA	NA
585	2	LC511	yes	2	1	NA	1	4	811	347	NA	7.8616	48.4022	3.7863	-8.0827
586	2	DP557	yes	2	1	NA	16	3	839	375	NA	10.8197	49.0517	13.4651	25.5345
587	1	LC139	yes	1	6	40	NA	3	808	344	NA	6.8331	48.0475	11.8237	-1.2364
588	1	LC128	yes	1	6	98	NA	3	817	353	NA	14.2735	50.5513	14.857	44.5266
589	2	LC503	yes	2	1	NA	43	1	547	171	NA	7.8616	49.7893	12.0624	8.6719
590	2	LC140	yes	2	2	NA	21	2	563	187	NA	15.3759	41.7309	11.0805	39.1544
591	1	LC235	yes	1	2	91	NA	3	548	172	NA	11.0386	43.5463	10.8126	17.3081
592	1	LC122	yes	1	5	160	NA	3	637	261	NA	14.1657	44.5036	15.1603	46.8197
593	1	LC057	yes	1	4	85	NA	4	559	183	NA	17.5085	46.8233	12.8348	61.3762
594	1	LC011	yes	1	5	186	NA	3	732	315	NA	17.2928	45.8383	12.2281	54.8956
595	1	LC013	yes	1	4	150	NA	3	523	147	NA	11.7934	46.0593	14.5537	28.9732
596	1	LC198	yes	1	2	200	NA	3	524	148	NA	17.5085	48.876	13.8459	73.141
597	2	DP559	yes	2	3	NA	13	2	511	135	NA	9.8677	47.1582	11.6415	16.4546
598	1	LC246	yes	1	1	42	NA	2	561	185	NA	19.9886	40.8032	11.0148	73.141
599	2	LC338	yes	2	2	NA	28	3	811	347	NA	12.9958	46.2885	14.7275	38.3977
600	1	LC064	yes	1	3	142	NA	1	803	339	NA	14.8127	48.7287	12.8348	45.0251
601	1	LC024	yes	1	5	73	NA	3	803	339	NA	11.3621	46.1881	13.037	21.2962
602	2	LC372	yes	2	1	NA	39	4	741	323	NA	4.7335	45.65	11.7818	-3.5428
603	1	LC078	yes	1	3	197	NA	1	547	171	NA	18.479	46.8601	12.4303	69.2526
604	1	LC091	yes	1	3	221	NA	3	532	156	NA	15.9988	48.9036	11.8237	48.0162
605	1	LC193	yes	1	5	143	NA	4	548	172	NA	14.597	46.8049	13.5426	42.732
606	1	LC107	yes	1	6	129	NA	3	557	NA	NA	NA	NA	NA	NA
607	1	LC267	yes	1	1	33	NA	2	510	134	NA	16.6458	46.722	14.2503	68.8538
608	1	LC067	yes	1	3	218	NA	1	541	165	NA	8.5584	45.5898	8.4871	1.1564
609	1	LC203	yes	1	2	116	NA	1	532	156	NA	14.3814	46.0224	13.2392	46.0221
610	2	DP534	yes	2	4	NA	5	4	511	135	NA	13.4378	49.8444	11.2207	28.2369
611	2	LC385	yes	2	4	NA	14	2	732	315	NA	13.4378	48.116	14.3067	38.0734
612	2	LC491	yes	2	2	NA	22	4	805	341	NA	15.7499	47.3894	14.7275	55.5847
613	1	LC182	yes	1	2	157	NA	4	523	147	NA	15.7832	45.3321	12.5315	51.8048
614	2	LC374	yes	2	1	NA	35	3	559	183	NA	8.2356	48.6224	12.3429	10.7257
615	2	LC329	yes	2	3	NA	19	3	805	340	NA	17.0759	44.5602	14.5873	67.475
616	1	LC232	yes	1	2	161	NA	2	541	165	NA	8.9897	46.2065	9.1948	4.8454
617	1	LC099	yes	1	4	125	NA	3	532	156	NA	15.3519	48.6275	14.0481	51.8048
618	1	LC162	yes	1	5	115	NA	3	541	165	NA	10.0681	50.7998	12.8348	14.0179
619	2	DP526	yes	2	1	NA	10	3	813	349	NA	17.0759	48.4903	13.7456	63.6917
620	1	LC123	yes	1	5	208	NA	1	561	185	NA	12.4404	48.066	15.8681	36.8496
621	2	LC452	yes	2	4	NA	7	4	560	184	NA	14.1518	47.3454	9.5375	26.1831
622	1	LC270	yes	1	1	180	NA	2	513	137	NA	10.0681	48.0752	9.1948	8.7338
623	2	LC439	yes	2	1	NA	41	3	805	341	NA	10.9897	47.8518	17.8135	38.5058
624	2	LC387	yes	2	4	NA	4	2	803	339	NA	14.5258	47.6536	15.7094	49.6395
625	1	LC103	yes	1	6	204	NA	3	732	315	NA	11.1464	47.5505	11.6215	15.3141
626	1	LC264	yes	1	1	74	NA	2	803	339	NA	12.0091	47.7806	11.0148	23.1905
627	1	LC223	yes	1	5	87	NA	4	817	353	NA	12.5482	46.4459	13.8459	30.8675
628	1	LC191	yes	1	5	91	NA	3	523	NA	NA	NA	NA	NA	NA
629	2	LC447	yes	2	4	NA	8	3	510	NA	NA	NA	NA	NA	NA
630	2	DP541	yes	2	2	NA	14	4	561	185	NA	17.4159	48.0609	10.0986	46.0724
631	1	LC186	yes	1	2	78	NA	2	541	164	NA	12.1169	46.9061	10.5093	21.3959
632	1	LC248	yes	1	2	80	NA	2	817	353	NA	15.244	42.5153	13.8459	54.7959
633	1	LC101	yes	1	5	134	NA	1	557	181	NA	13.95	46.4091	13.2392	37.049
634	1	LC071	yes	1	3	218	NA	3	541	165	NA	15.0284	47.4124	12.127	43.3302
635	2	DP525	yes	2	4	NA	14	2	513	137	NA	11.5677	44.8794	11.7818	20.9946
636	1	LC256	yes	1	1	74	NA	4	803	339	NA	17.7242	47.2743	15.5648	86.8001
637	2	DP554	yes	2	2	NA	7	2	523	147	NA	12.6218	44.6482	9.6777	20.7784
638	1	LC015	yes	1	5	135	NA	4	559	183	NA	11.2542	46.5655	13.2392	21.1965
639	1	LC175	yes	1	4	122	NA	2	582	206	NA	15.7832	46.0132	13.4414	51.8048
640	2	LC341	yes	2	4	NA	12	4	561	185	NA	9.5617	47.0371	11.7818	11.9147
641	2	LC075	yes	2	3	NA	9	3	563	NA	NA	NA	NA	NA	NA
642	2	LC425	yes	2	1	NA	33	3	741	324	NA	10.0717	49.7673	11.361	16.5627
643	1	LC125	yes	1	5	159	NA	2	524	148	NA	10.8229	49.3639	12.4303	16.9093
644	2	LC421	yes	2	1	NA	43	3	547	171	NA	5.4475	45.661	9.3972	-4.6237
645	2	LC502	yes	2	1	NA	44	3	510	134	NA	8.7797	48.9416	11.5013	11.2661
646	2	LC391	yes	2	3	NA	10	4	808	344	NA	12.1118	45.0225	11.7818	27.264
647	2	DP535	yes	2	4	NA	1	3	524	148	NA	15.2739	49.1508	17.3927	60.7732
648	2	LC323	yes	2	3	NA	5	1	523	147	NA	9.1537	45.4629	10.0986	9.6447
649	2	DP547	yes	2	1	NA	13	4	511	135	NA	9.3237	48.8316	9.9583	9.969
650	2	LC409	yes	2	4	NA	8	2	541	165	NA	8.9837	49.5471	12.6234	11.3742
651	2	LC449	yes	2	4	NA	14	1	563	187	NA	7.3516	44.7693	9.818	-0.408
652	2	LC457	yes	2	1	NA	43	4	547	171	NA	14.8658	45.8922	14.8678	53.7471
653	1	LC185	yes	1	4	122	NA	3	582	206	NA	12.8717	50.3028	12.127	27.1785
654	2	LC340	yes	2	3	NA	5	3	523	147	NA	7.1136	44.7253	7.8542	-2.1375
655	2	LC368	yes	2	4	NA	6	3	548	172	NA	9.5617	47.2463	9.5375	6.9424
656	2	LC384	yes	2	4	NA	16	1	547	171	NA	8.2696	44.7033	11.6415	6.2938
657	2	DP536	yes	2	1	NA	5	4	560	184	NA	16.9059	47.9288	9.9583	45.5319
658	1	LC061	yes	1	5	208	NA	2	561	185	NA	8.4506	44.8994	13.8459	8.6341
659	2	LC149	yes	2	2	NA	21	3	563	187	NA	8.7456	48.3141	9.2569	4.3481
660	2	LC401	yes	2	4	NA	6	3	532	156	NA	9.7317	47.8408	12.904	15.2656
661	1	LC229	yes	1	1	171	NA	2	805	341	NA	12.7639	42.635	13.8459	37.7469
662	2	LC390	yes	2	2	NA	8	2	808	344	NA	12.9958	46.1674	12.6234	31.804
663	2	LC357	yes	2	2	NA	27	4	532	156	NA	13.3358	44.329	12.2026	32.3445
664	1	LC272	yes	1	1	5	NA	4	524	NA	NA	NA	NA	13.8459	NA
665	2	LC434	yes	2	4	NA	13	1	817	353	NA	12.3158	46.1895	11.9221	24.886
666	1	LC201	yes	1	2	118	NA	1	805	341	NA	9.3132	47.3388	11.217	10.7278
667	1	LC190	yes	1	4	229	NA	2	817	353	NA	14.1657	49.1337	13.2392	39.6412
668	1	LC146	yes	1	6	188	NA	2	741	324	NA	18.0477	47.0166	14.0481	69.8508
669	2	LC512	yes	2	2	NA	22	3	805	341	NA	15.3759	48.9196	14.1664	51.0447
670	1	LC219	yes	1	1	186	NA	1	532	156	NA	16.538	50.5145	14.7559	70.6484
671	1	LC279	yes	1	1	171	NA	3	805	341	NA	12.8717	43.8685	14.857	42.6323
672	2	LC487	yes	2	1	NA	10	2	813	349	NA	12.2818	48.6994	11.2207	26.3993
673	1	LC251	yes	1	1	59	NA	3	811	347	NA	18.479	48.112	13.6437	81.0174
674	1	LC289	yes	1	2	91	NA	1	548	172	NA	12.3325	47.1178	9.8015	20
675	1	LC222	yes	1	4	18	NA	4	547	171	NA	15.3519	48.4618	13.2392	47.9165
676	1	LC044	yes	1	4	199	NA	2	510	134	NA	11.5777	46.5195	14.857	29.0729
677	2	LC379	yes	2	3	NA	19	1	532	156	NA	13.4038	45.9253	14.3067	42.5053
678	1	LC164	yes	1	2	215	NA	3	547	171	NA	8.3428	48.4157	10.1048	4.5463
679	1	LC276	yes	1	1	29	NA	4	582	205	NA	15.1362	43.04	15.8681	65.1648
680	1	LC134	yes	1	6	204	NA	2	732	315	NA	11.3621	45.8475	11.0148	14.2173
681	1	LC026	yes	1	5	69	NA	1	547	171	NA	12.9795	44.1446	14.3514	35.1547
682	2	LC483	yes	2	4	NA	4	3	811	347	NA	18.0279	49.6462	15.8497	74.6092
683	1	LC150	yes	1	5	208	NA	3	561	185	NA	17.2928	48.3513	15.6659	74.8359
684	1	LC124	yes	1	6	204	NA	1	732	315	NA	16.2145	48.1948	14.4525	56.8896
685	1	LC169	yes	1	4	18	NA	2	547	171	NA	12.5482	46.2526	11.5204	23.5893
686	1	LC040	yes	1	3	142	NA	3	803	339	NA	13.95	47.6793	12.5315	38.3451
687	1	LC171	yes	1	4	18	NA	1	547	171	NA	15.7832	46.6116	13.037	49.7111
688	1	LC012	yes	1	5	73	NA	1	803	339	NA	15.6754	45.2124	14.6548	55.7929
689	2	LC446	yes	2	2	NA	1	2	513	180	NA	NA	NA	NA	NA
690	2	LC406	yes	2	4	NA	11	1	805	341	NA	7.5216	50.0865	8.6958	-1.8132
691	2	LC466	yes	2	4	NA	4	1	811	347	NA	13.7778	47.1362	13.0443	36.1278
692	2	LC074	yes	2	2	NA	27	1	532	156	NA	7.0796	46.2555	7.8542	-3.867
693	2	DP544	yes	2	1	NA	10	4	532	156	NA	10.2417	49.404	11.6415	18.0761
694	2	LC470	yes	2	1	NA	19	1	524	148	NA	8.7797	49.5471	12.4832	13.428
695	2	LC435	yes	2	1	NA	41	2	805	341	NA	8.9497	47.1472	17.1121	24.7779
696	2	LC471	yes	2	4	NA	6	4	548	172	NA	15.4439	48.4793	15.2886	54.0714
697	2	LC451	yes	2	4	NA	11	2	559	183	NA	9.5617	49.5141	11.5013	11.2661
698	2	LC458	yes	2	3	NA	9	3	582	206	NA	7.8616	47.2133	9.6777	3.8076
699	1	LC263	yes	1	1	74	NA	1	803	339	NA	11.7934	47.3111	6.9704	7.8365
700	2	LC482	yes	2	4	NA	11	2	813	349	NA	10.8537	47.2793	12.904	20.4541
701	2	DP520	yes	2	1	NA	9	2	552	176	NA	13.1998	48.2261	13.1845	37.6411
702	1	LC177	yes	1	4	115	NA	4	552	176	NA	8.3428	50.5881	11.0148	3.9481
703	1	LC262	yes	1	1	186	NA	2	532	156	NA	13.95	47.1086	13.947	46.4209
704	2	LC382	yes	2	4	NA	16	2	547	171	NA	13.0638	47.5105	12.4832	30.2907
705	2	LC377	yes	2	1	NA	33	4	513	137	NA	15.6139	47.3784	7.0126	26.6155
706	1	LC082	yes	1	3	23	NA	1	510	134	NA	14.4892	47.9647	12.4303	41.3362
707	2	LC350	yes	2	4	NA	17	4	808	344	NA	7.6916	42.7658	8.275	-1.9213
708	1	LC085	yes	1	3	18	NA	4	560	184	NA	20.7435	48.0107	11.217	77.9266
709	2	LC151	yes	2	2	NA	5	1	524	148	NA	12.6218	48.2261	10.9402	24.6698
710	1	LC138	yes	1	6	173	NA	4	811	347	NA	13.0874	49.5019	14.5537	35.055
711	1	LC087	yes	1	3	223	NA	3	563	187	NA	6.8331	45.9764	9.4982	-2.1337
712	2	LC364	yes	2	4	NA	6	1	532	156	NA	13.4378	50.3508	14.5873	39.0463
713	1	LC166	yes	1	4	169	NA	3	560	184	NA	8.6662	50.1831	12.5315	7.9362
714	2	LC422	yes	2	1	NA	33	3	513	137	NA	6.7396	47.9288	7.4334	-3.9751
715	1	LC108	yes	1	6	211	NA	4	510	133	NA	4.6765	46.2526	6.566	-11.6053
716	1	LC226	yes	1	1	80	NA	1	552	176	NA	12.4404	47.3756	13.3403	34.058
717	2	LC445	yes	2	2	NA	13	1	547	171	NA	15.0018	47.4004	10.2388	34.074
718	1	LC187	yes	1	5	160	NA	4	637	261	NA	18.9103	46.8785	15.8681	91.486
719	2	LC448	yes	2	4	NA	16	3	547	171	NA	15.2739	50.9012	12.904	44.0186
720	1	LC159	yes	1	4	169	NA	4	560	184	NA	10.3916	47.0994	11.8237	14.0179
721	2	LC376	yes	2	1	NA	33	2	741	324	NA	9.3237	46.1124	13.4651	18.2922
722	2	LC404	yes	2	2	NA	30	2	803	339	NA	11.3297	42.6887	14.3067	27.8045
723	1	LC212	yes	1	2	78	NA	3	561	184	NA	8.3428	48.3145	10.2059	4.7457
724	1	LC163	yes	1	4	150	NA	1	523	147	NA	12.4404	48.1856	13.2392	28.7738
725	2	DP508	yes	2	3	NA	14	3	548	172	NA	7.1136	50.604	9.9583	1.7539
726	2	LC367	yes	2	3	NA	5	4	560	184	NA	14.4918	46.7179	12.3429	41.9648
727	1	LC034	yes	1	6	173	NA	3	811	347	NA	13.7344	46.63	13.4414	35.2544
728	2	LC501	yes	2	3	NA	13	4	511	135	NA	10.2417	46.4096	12.2026	19.4813
729	2	LC506	yes	2	3	NA	5	1	560	184	NA	15.2399	48.9086	9.6777	35.5873
730	1	LC265	yes	1	1	180	NA	1	513	137	NA	14.4892	42.6902	11.5204	38.7439
731	2	LC363	yes	2	4	NA	7	2	741	324	NA	12.6898	47.0481	9.6777	20.0217
732	2	LC465	yes	2	2	NA	5	3	524	148	NA	7.9976	46.1674	7.2931	-2.1375
733	2	LC517	yes	2	1	NA	11	2	803	339	NA	23.5361	47.2133	15.7094	125.7377
734	2	LC355	yes	2	2	NA	5	4	524	NA	NA	NA	NA	NA	NA
735	1	LC195	yes	1	1	80	NA	2	552	176	NA	13.0874	44.1078	13.2392	37.9463
736	2	LC392	yes	2	3	NA	10	1	808	344	NA	7.4876	44.1088	9.3972	1.97
737	1	LC050	yes	1	4	193	NA	4	513	137	NA	5.9704	48.8392	9.1948	-6.0221
738	1	LC236	yes	1	2	116	NA	4	532	156	NA	7.6958	43.712	11.1159	4.1475
739	2	LC454	yes	2	4	NA	2	4	552	176	NA	11.7717	48.8426	11.6415	21.427
740	2	LC369	yes	2	4	NA	11	3	805	341	NA	13.7778	45.1436	12.904	35.6954
741	2	LC073	yes	2	2	NA	30	4	803	339	NA	13.3358	44.329	13.8859	37.8573
742	2	LC398	yes	2	2	NA	31	1	560	184	NA	6.3316	47.3784	9.9583	-2.5699
743	1	LC254	yes	1	1	115	NA	1	741	324	NA	10.3916	40.6835	9.4982	11.0269
744	1	LC029	yes	1	5	73	NA	2	803	339	NA	14.9205	46.9614	13.2392	43.2305
745	2	LC498	yes	2	4	NA	17	3	808	344	NA	6.9776	48.5013	8.9764	-3.0023
746	2	LC358	yes	2	2	NA	26	4	541	165	NA	9.1197	45.4409	12.3429	12.3471
747	1	LC176	yes	1	2	210	NA	1	510	134	NA	9.0976	46.768	8.7904	4.3469
748	1	LC183	yes	1	2	78	NA	1	511	135	NA	9.4211	47.9095	10.4082	9.2323
749	1	LC284	yes	1	3	97	NA	2	548	172	NA	13.7344	44.1814	13.2392	39.6412
750	1	LC133	yes	1	6	129	NA	1	557	181	NA	15.6754	45.4425	13.5426	48.415
751	2	LC335	yes	2	2	NA	13	4	547	171	NA	15.2059	44.8024	8.6958	29.2097
752	1	LC048	yes	1	4	193	NA	3	513	137	NA	21.1748	44.3011	14.5537	105.8431
753	1	LC156	yes	1	5	175	NA	1	560	184	NA	9.2054	46.7865	12.127	8.8335
754	2	LC402	yes	2	4	NA	4	3	803	339	NA	6.4336	46.6188	7.5737	-6.8937
755	1	LC173	yes	1	4	193	NA	1	513	137	NA	8.3428	44.9731	10.2059	2.4526
756	2	LC488	yes	2	4	NA	6	1	548	172	NA	9.5617	49.2169	9.6777	7.2666
757	2	DP546	yes	2	1	NA	9	4	552	176	NA	10.2417	49.5581	12.2026	19.4813
758	2	LC354	yes	2	1	NA	33	1	513	137	NA	8.4056	43.7345	11.2207	9.2123
759	1	LC083	yes	1	6	12	NA	4	813	349	NA	12.7639	47.1455	14.3514	32.5624
760	1	LC062	yes	1	3	218	NA	2	541	165	NA	8.5584	46.4827	8.8915	2.0538
761	2	LC326	yes	2	3	NA	9	2	582	206	NA	16.1579	45.4189	13.1845	55.2604
762	2	LC324	yes	2	2	NA	9	2	548	172	NA	10.2077	45.2317	9.5375	10.4014
763	2	LC346	yes	2	4	NA	15	2	557	181	NA	9.5617	43.1401	9.1167	5.9695
764	1	LC167	yes	1	4	176	NA	1	524	148	NA	8.2349	49.7781	10.5093	2.5523
765	1	LC238	yes	1	5	175	NA	3	560	184	NA	14.9205	43.2057	13.4414	44.1278
766	1	LC189	yes	1	5	175	NA	4	560	184	NA	10.1759	46.768	11.8237	12.2233
767	2	DP545	yes	2	2	NA	33	2	741	324	NA	4.4955	45.5289	5.7501	-13.5955
768	2	LC432	yes	2	2	NA	8	3	808	344	NA	8.2016	47.6866	9.1167	2.0781
769	1	LC058	yes	1	6	217	NA	4	561	184	NA	16.538	48.7011	14.5537	60.5786
770	2	LC022	yes	2	2	NA	29	3	552	176	NA	10.9557	48.5123	12.7637	21.8593
771	2	LC342	yes	2	4	NA	4	4	811	347	NA	8.9837	48.5013	15.99	18.4003
772	2	LC492	yes	2	4	NA	14	1	732	315	NA	7.1476	47.7087	8.6958	-2.8942
773	2	LC431	yes	2	2	NA	27	2	532	156	NA	2.4554	46.817	5.3293	-18.0274
774	2	LC453	yes	2	1	NA	41	4	805	341	NA	17.2459	49.0848	17.2524	81.0949
775	2	LC437	yes	2	4	NA	6	3	839	375	NA	15.0699	48.3362	12.3429	40.8839
776	2	LC333	yes	2	3	NA	10	2	808	344	NA	7.6576	44.4611	10.0986	4.0238
777	2	DP500	yes	2	1	NA	19	4	561	185	NA	5.0735	46.2335	11.5013	-2.678
778	2	LC455	yes	2	1	NA	19	2	524	148	NA	10.4457	46.9601	12.6234	21.5351
779	2	LC328	yes	2	2	NA	22	2	805	341	NA	14.0838	43.8556	15.0081	45.9643
780	1	LC126	yes	1	5	60	NA	4	808	344	NA	12.0091	48.6459	13.8459	27.5774
781	2	LC441	yes	2	4	NA	11	3	813	349	NA	8.2696	48.2921	11.7818	6.6181
782	1	LC155	yes	1	6	217	NA	1	561	184	NA	10.6072	48.0199	5.3527	-14.4967
783	2	LC427	yes	2	4	NA	11	4	813	349	NA	4.7675	49.0077	11.5013	-6.3532
784	1	LC046	yes	1	5	91	NA	1	523	171	NA	10.0681	44.8718	12.127	12.323
785	2	LC510	yes	2	2	NA	30	3	803	339	NA	12.2478	43.4813	16.5511	39.4787
786	1	LC072	yes	1	3	112	NA	1	552	176	NA	8.5584	46.9982	10.5093	5.4436
787	1	LC269	yes	1	1	59	NA	4	811	347	NA	12.9795	44.5588	12.5315	34.1577
788	2	LC508	yes	2	1	NA	10	3	582	206	NA	11.1597	46.3326	13.6054	27.9126
789	2	DP530	yes	2	3	NA	14	2	548	172	NA	6.7396	46.3106	10.0986	0.781
790	1	LC090	yes	1	6	144	NA	2	805	341	NA	10.0681	49.2442	11.0148	9.1326
791	1	LC282	yes	1	1	33	NA	1	510	134	NA	9.3132	48.5078	13.1381	16.012
792	2	DP523	yes	2	2	NA	21	3	732	315	NA	8.9157	48.7765	9.3972	5.2129
793	2	LC386	yes	2	1	NA	19	4	524	148	NA	5.0735	48.3692	8.4153	-7.218
794	2	DP537	yes	2	1	NA	10	4	582	206	NA	13.0298	50.7911	14.0262	39.3706
795	2	LC468	yes	2	2	NA	28	1	511	135	NA	10.4117	46.6849	15.4289	25.8588
796	2	DP518	yes	2	2	NA	7	3	523	147	NA	14.0838	48.2261	9.9583	28.5612
797	1	LC104	yes	1	5	144	NA	2	741	324	NA	9.2054	50.4501	11.5204	7.5373
798	1	LC089	yes	1	4	199	NA	3	510	134	NA	12.3325	47.7346	11.217	21.1965
799	2	LC428	yes	2	2	NA	20	3	582	206	NA	10.2077	47.9178	7.4334	5.321
800	2	DP513	yes	2	1	NA	10	1	532	156	NA	6.7396	45.2757	11.7818	3.6995
801	2	LC079	yes	2	3	NA	10	2	839	375	NA	12.4518	47.8848	14.7275	38.3977
802	1	LC110	yes	1	6	173	NA	1	811	347	NA	12.5482	46.5195	7.9815	9.8305
803	2	LC081	yes	2	2	NA	21	1	563	187	NA	4.8695	47.4445	9.9583	-7.218
804	2	LC330	yes	2	3	NA	2	4	513	137	NA	3.4415	42.8208	6.4515	-13.9198
805	2	DP510	yes	2	2	NA	8	4	808	344	NA	7.6236	48.9637	8.6958	-0.6242
806	2	LC423	yes	2	4	NA	1	2	524	148	NA	7.6916	46.0353	11.2207	3.3753
807	2	DP529	yes	2	1	NA	13	3	541	165	NA	16.7019	47.3564	14.5873	64.9889
808	2	DP512	yes	2	1	NA	9	3	552	176	NA	11.9078	43.8556	12.4832	28.4531
809	2	LC345	yes	2	2	NA	21	3	559	183	NA	10.9557	43.4703	10.0986	14.8332
810	2	DP509	yes	2	4	NA	6	4	532	156	NA	9.5617	47.9288	13.3248	15.3737
811	2	DP561	yes	2	1	NA	16	1	839	375	NA	4.7335	44.7693	5.6099	-12.0822
812	2	LC459	yes	2	2	NA	27	1	510	134	NA	6.9096	46.0464	10.3791	-0.0837
813	2	DP540	yes	2	1	NA	10	1	582	206	NA	12.6558	48.3582	10.9402	27.3721
814	1	LC180	yes	1	4	119	NA	1	805	341	NA	14.7049	49.1429	13.5426	44.6263
815	2	LC145	yes	2	3	NA	9	1	582	206	NA	10.4457	48.9857	8.6958	11.158
816	2	LC153	yes	2	2	NA	27	4	817	353	NA	13.5398	45.8372	11.7818	31.9121
817	1	LC161	yes	1	5	152	NA	4	805	341	NA	13.5187	47.753	16.0703	45.3242
818	1	LC030	yes	1	4	87	NA	4	741	324	NA	10.2837	47.5137	10.6104	10.329
819	2	LC331	yes	2	3	NA	10	1	839	375	NA	11.9078	45.5399	14.447	34.2902
820	1	LC239	yes	1	1	229	NA	1	813	349	NA	9.8524	43.5831	7.3749	3.3499
821	2	LC317	yes	2	3	NA	5	3	560	184	NA	13.4038	46.4647	10.6596	30.0745
822	1	LC172	yes	1	4	87	NA	1	741	324	NA	14.2735	49.2258	10.5093	28.7738
823	1	LC253	yes	1	1	186	NA	3	532	156	NA	17.4007	39.8827	14.9581	80.3195
824	2	LC339	yes	2	2	NA	31	3	560	NA	NA	NA	NA	NA	NA
825	2	LC373	yes	2	4	NA	12	1	561	185	NA	9.5617	42.2263	14.1664	17.2113
826	2	DP524	yes	2	1	NA	10	1	813	349	NA	14.3218	47.6866	15.4289	52.2338
827	1	LC157	yes	1	2	179	NA	2	552	176	NA	8.9897	45.4425	7.7793	1.5553
828	2	DP516	yes	2	2	NA	20	4	582	206	NA	11.1257	49.0958	13.1845	23.9131
829	1	LC141	yes	1	6	94	NA	1	511	135	NA	14.3814	47.1455	13.8459	41.3362
830	2	LC076	yes	2	2	NA	27	4	510	134	NA	12.2478	49.349	10.9402	22.9403
831	2	LC383	yes	2	4	NA	8	3	541	165	NA	8.9837	47.4885	12.4832	11.0499
832	2	DP532	yes	2	2	NA	9	3	813	349	NA	10.4117	45.0225	10.6596	13.9685
833	2	DP543	yes	2	1	NA	11	4	548	172	NA	16.1579	46.2115	14.5873	61.2056
834	2	DP553	yes	2	2	NA	29	1	552	176	NA	13.9138	43.8666	13.1845	38.6139
835	2	LC365	yes	2	2	NA	28	1	811	347	NA	13.7098	47.2353	15.99	47.0453
836	2	LC479	yes	2	2	NA	27	3	510	134	NA	12.9958	45.0996	12.6234	31.804
837	2	DP511	yes	2	2	NA	7	4	523	147	NA	14.2878	47.8298	9.818	28.8855
838	1	LC084	yes	1	5	175	NA	2	560	184	NA	16.3223	46.2618	13.8459	56.8896
839	1	LC069	yes	1	6	151	NA	4	559	183	NA	15.9988	48.8944	13.6437	51.8048
840	2	DP552	yes	2	1	NA	11	3	803	339	NA	9.6977	49.2058	14.8678	23.4808
841	2	LC426	yes	2	1	NA	19	2	561	185	NA	9.5277	48.6994	11.2207	13.7523
842	1	LC096	yes	1	6	204	NA	4	732	315	NA	8.1271	45.3229	8.4871	-2.6322
843	1	LC221	yes	1	2	183	NA	2	561	185	NA	10.6072	47.753	11.8237	18.5045
844	2	LC137	yes	2	3	NA	9	1	563	187	NA	8.2356	48.8536	9.818	5.4291
845	2	LC046	yes	2	2	NA	28	2	548	171	NA	6.7056	47.7637	9.3972	-2.3537
846	2	LC109	yes	2	3	NA	9	4	563	186	NA	10.8197	49.8994	10.6596	17.968
847	2	LC446	yes	2	2	NA	17	3	557	180	NA	7.2496	45.3748	8.275	-2.4618
848	2	DP533	no	2	2	NA	9	2	813	349	NA	18.878	44.6152	14.5873	76.7711
849	2	DP539	no	2	1	NA	13	2	511	135	NA	14.6618	49.7233	13.6054	47.6938
850	2	DP548	no	2	1	NA	11	1	803	339	NA	15.6139	45.3968	10.7999	42.0729
851	1	LC052	no	1	4	125	NA	2	532	156	NA	11.2542	46.4275	12.8348	20.7976
852	1	LC053	no	1	6	144	NA	1	805	341	NA	14.0579	49.3915	14.0481	39.4418
853	1	LC077	no	1	3	18	NA	2	560	184	NA	22.0375	46.6208	14.6548	120.7983
854	1	LC080	no	1	5	91	NA	4	523	147	NA	13.8422	47.5965	13.5426	37.3481
855	1	LC094	no	1	4	125	NA	4	532	156	NA	12.1169	48.5998	12.5315	24.8854
856	1	LC095	no	1	6	98	NA	4	817	353	NA	15.244	46.1421	15.3625	53.8986
857	2	LC142	no	2	2	NA	28	4	811	347	NA	12.6218	46.5417	12.6234	29.8583
858	1	LC168	no	1	4	199	NA	4	510	134	NA	17.9398	48.4526	14.5537	75.3344
859	1	LC196	no	1	2	200	NA	2	524	148	NA	12.1169	50.4316	11.6215	25.3839
860	1	LC261	no	1	4	229	NA	3	817	353	NA	15.244	48.0015	13.2392	46.9194
861	1	LC287	no	1	1	221	NA	4	511	135	NA	12.9795	48.0291	9.8015	23.1905
862	2	LC353	no	2	1	NA	15	4	732	315	NA	6.7396	42.6557	8.8361	-1.489
863	2	LC361	no	2	2	NA	5	2	524	148	NA	16.1239	46.9931	12.3429	48.3424
864	2	LC407	no	2	4	NA	4	1	803	339	NA	9.1877	46.7069	15.0081	17.3194
865	2	LC430	no	2	3	NA	10	1	510	134	NA	10.6157	43.7896	11.0805	18.2922
866	2	LC433	no	2	4	NA	11	1	559	183	NA	14.1518	47.6536	13.7456	40.5596
867	2	LC476	no	2	2	NA	30	1	803	339	NA	8.9157	44.5932	14.3067	15.8061
868	2	LC481	no	2	1	NA	44	1	510	134	NA	10.0717	49.6682	14.447	24.3455
869	2	LC485	no	2	1	NA	13	2	541	165	NA	5.8216	45.8372	7.5737	-6.3532
870	2	LC497	no	2	4	NA	12	3	561	185	NA	10.1057	52.3874	15.7094	23.5888
871	2	LC509	no	2	1	NA	10	2	532	156	NA	20.034	45.1216	15.0081	91.58
872	1	NA	no	1	1	138	NA	1	501	125	NA	NA	NA	NA	NA
873	1	NA	no	1	1	138	NA	2	501	125	NA	NA	NA	NA	NA
874	1	NA	no	1	1	138	NA	3	501	125	NA	NA	NA	NA	NA
875	1	NA	no	1	1	138	NA	4	501	125	NA	NA	NA	NA	NA
876	1	NA	no	1	2	117	NA	1	501	125	NA	NA	NA	NA	NA
877	1	NA	no	1	2	117	NA	2	501	125	NA	NA	NA	NA	NA
878	1	NA	no	1	2	117	NA	3	501	125	NA	7.6958	NA	7.3749	-2.8316
879	1	NA	no	1	2	117	NA	4	501	125	NA	14.8127	NA	13.6437	50.8078
880	1	NA	no	1	3	217	NA	1	501	125	NA	3.9216	NA	6.6671	-11.5056
881	1	NA	no	1	3	217	NA	2	501	125	NA	6.1861	NA	8.5882	-5.1247
882	1	NA	no	1	3	217	NA	3	501	125	NA	11.2542	NA	9.5993	13.5194
883	1	NA	no	1	3	217	NA	4	501	125	NA	5.1078	NA	8.1837	-8.0161
884	1	NA	no	1	4	20	NA	1	501	125	NA	2.8433	NA	4.746	-14.397
885	1	NA	no	1	4	20	NA	2	501	125	NA	NA	NA	NA	NA
886	1	NA	no	1	4	20	NA	3	501	125	NA	12.1169	NA	11.1159	20.1994
887	1	NA	no	1	4	20	NA	4	501	125	NA	1.765	NA	3.7349	-15.4937
888	1	NA	no	1	5	148	NA	1	501	125	NA	11.4699	NA	13.8459	24.4866
889	1	NA	no	1	5	148	NA	2	501	125	NA	12.5482	NA	14.2503	32.2633
890	1	NA	no	1	5	148	NA	3	501	125	NA	14.0579	NA	15.3625	46.6203
891	1	NA	no	1	5	148	NA	4	501	125	NA	NA	NA	NA	NA
892	1	NA	no	1	6	159	NA	1	501	125	NA	9.4211	NA	9.7004	3.7487
893	1	NA	no	1	6	159	NA	2	501	125	NA	4.0295	NA	6.4649	-12.5027
894	1	NA	no	1	6	159	NA	3	501	125	NA	4.8921	NA	4.9482	-12.7021
895	1	NA	no	1	6	159	NA	4	501	125	NA	NA	NA	NA	NA
896	2	NA	no	2	1	NA	36	1	501	125	NA	11.7377	NA	11.6415	24.9941
897	2	NA	no	2	1	NA	36	2	501	125	NA	NA	NA	NA	NA
898	2	NA	no	2	1	NA	36	3	501	125	NA	NA	NA	NA	NA
899	2	NA	no	2	1	NA	36	4	501	125	NA	NA	NA	NA	NA
900	2	NA	no	2	2	NA	7	1	501	125	NA	18.708	NA	12.2026	63.6917
901	2	NA	no	2	2	NA	7	2	501	125	NA	12.0438	NA	7.7139	12.6714
902	2	NA	no	2	2	NA	7	3	501	125	NA	NA	NA	NA	NA
903	2	NA	no	2	2	NA	7	4	501	125	NA	3.4075	NA	4.4877	-17.1626
904	2	NA	no	2	3	NA	17	1	501	125	NA	NA	NA	NA	NA
905	2	NA	no	2	3	NA	17	2	501	125	NA	6.9436	NA	3.085	-11.4336
906	2	NA	no	2	3	NA	17	3	501	125	NA	2.6935	NA	2.3836	-19.7569
907	2	NA	no	2	3	NA	17	4	501	125	NA	NA	NA	NA	NA
908	2	NA	no	2	4	NA	9	1	501	125	NA	NA	NA	NA	NA
909	2	NA	no	2	4	NA	9	2	501	125	NA	NA	NA	NA	NA
910	2	NA	no	2	4	NA	9	3	501	125	NA	7.8956	NA	8.6958	-0.6242
911	2	NA	no	2	4	NA	9	4	501	125	NA	NA	NA	NA	NA
912	1	NA	no	1	1	38	NA	1	502	126	NA	NA	NA	NA	NA
913	1	NA	no	1	1	38	NA	2	502	126	NA	8.0193	NA	7.1726	-2.2334
914	1	NA	no	1	1	38	NA	3	502	126	NA	NA	NA	NA	NA
915	1	NA	no	1	1	38	NA	4	502	126	NA	NA	NA	NA	NA
916	1	NA	no	1	2	208	NA	1	502	126	NA	12.1169	NA	12.127	27.1785
917	1	NA	no	1	2	208	NA	2	502	126	NA	7.3723	NA	9.1948	-0.2394
918	1	NA	no	1	2	208	NA	3	502	126	NA	11.2542	NA	11.1159	19.6012
919	1	NA	no	1	2	208	NA	4	502	126	NA	14.3814	NA	12.127	40.738
920	1	NA	no	1	3	32	NA	1	502	126	NA	10.6072	NA	11.217	15.4138
921	1	NA	no	1	3	32	NA	2	502	126	NA	15.0284	NA	13.4414	49.8108
922	1	NA	no	1	3	32	NA	3	502	126	NA	9.0976	NA	11.3181	9.2323
923	1	NA	no	1	3	32	NA	4	502	126	NA	10.6072	NA	11.217	15.4138
924	1	NA	no	1	4	147	NA	1	502	126	NA	12.8717	NA	14.3514	35.1547
925	1	NA	no	1	4	147	NA	2	502	126	NA	11.0386	NA	14.2503	24.0878
926	1	NA	no	1	4	147	NA	3	502	126	NA	NA	NA	NA	NA
927	1	NA	no	1	4	147	NA	4	502	126	NA	11.0386	NA	13.8459	22.8914
928	1	NA	no	1	5	224	NA	1	502	126	NA	5.9704	NA	11.6215	-3.6292
929	1	NA	no	1	5	224	NA	2	502	126	NA	8.7741	NA	12.4303	7.7367
930	1	NA	no	1	5	224	NA	3	502	126	NA	12.8717	NA	14.2503	33.9583
931	1	NA	no	1	5	224	NA	4	502	126	NA	12.3325	NA	14.0481	29.8705
932	1	NA	no	1	6	208	NA	1	502	126	NA	12.2247	NA	12.7337	24.0878
933	1	NA	no	1	6	208	NA	2	502	126	NA	15.7832	NA	14.6548	54.6962
934	1	NA	no	1	6	208	NA	3	502	126	NA	14.0579	NA	13.8459	38.6442
935	1	NA	no	1	6	208	NA	4	502	126	NA	2.9511	NA	5.4538	-14.2973
936	2	NA	no	2	1	NA	16	1	502	126	NA	NA	NA	NA	NA
937	2	NA	no	2	1	NA	16	2	502	126	NA	11.3637	NA	13.4651	28.4531
938	2	NA	no	2	1	NA	16	3	502	126	NA	22.9921	NA	14.8678	115.0364
939	2	NA	no	2	1	NA	16	4	502	126	NA	12.4518	NA	14.8678	38.8301
940	2	NA	no	2	2	NA	22	1	502	126	NA	14.2878	NA	13.7456	42.7215
941	2	NA	no	2	2	NA	22	2	502	126	NA	10.7857	NA	10.6596	15.5899
942	2	NA	no	2	2	NA	22	3	502	126	NA	15.3759	NA	14.1664	51.0447
943	2	NA	no	2	2	NA	22	4	502	126	NA	11.8737	NA	12.3429	25.2103
944	2	NA	no	2	3	NA	25	1	502	126	NA	NA	NA	NA	NA
945	2	NA	no	2	3	NA	25	2	502	126	NA	6.0256	NA	8.6958	-4.0832
946	2	NA	no	2	3	NA	25	3	502	126	NA	4.7335	NA	7.4334	-9.596
947	2	NA	no	2	3	NA	25	4	502	126	NA	3.2375	NA	5.189	-15.7574
948	2	NA	no	2	4	NA	11	1	502	126	NA	NA	NA	NA	NA
949	2	NA	no	2	4	NA	11	2	502	126	NA	NA	NA	NA	NA
950	2	NA	no	2	4	NA	11	3	502	126	NA	NA	NA	NA	NA
951	2	NA	no	2	4	NA	11	4	502	126	NA	NA	NA	NA	NA
952	1	NA	no	1	1	4	NA	1	503	127	NA	1.118	NA	3.4316	-15.4937
953	1	NA	no	1	1	4	NA	2	503	127	NA	16.8615	NA	14.857	74.8359
954	1	NA	no	1	1	4	NA	3	503	127	NA	NA	NA	NA	NA
955	1	NA	no	1	1	4	NA	4	503	127	NA	NA	NA	NA	NA
956	1	NA	no	1	2	228	NA	1	503	127	NA	5.5391	NA	7.476	-7.5176
957	1	NA	no	1	2	228	NA	2	503	127	NA	12.3325	NA	13.037	32.0639
958	1	NA	no	1	2	228	NA	3	503	127	NA	11.7934	NA	13.8459	31.6651
959	1	NA	no	1	2	228	NA	4	503	127	NA	-1.1465	NA	2.7238	-16.4907
960	1	NA	no	1	3	30	NA	1	503	127	NA	2.9511	NA	5.1504	-13.6991
961	1	NA	no	1	3	30	NA	2	503	127	NA	NA	NA	NA	NA
962	1	NA	no	1	3	30	NA	3	503	127	NA	13.6265	NA	13.037	37.9463
963	1	NA	no	1	3	30	NA	4	503	127	NA	10.9307	NA	11.1159	16.4108
964	1	NA	no	1	4	144	NA	1	503	127	NA	9.6367	NA	12.8348	12.7218
965	1	NA	no	1	4	144	NA	2	503	127	NA	11.7934	NA	13.6437	26.1815
966	1	NA	no	1	4	144	NA	3	503	127	NA	NA	NA	NA	NA
967	1	NA	no	1	4	144	NA	4	503	127	NA	19.773	NA	15.2614	97.8669
968	1	NA	no	1	5	99	NA	1	503	127	NA	4.4608	NA	11.217	-7.9164
969	1	NA	no	1	5	99	NA	2	503	127	NA	NA	NA	NA	NA
970	1	NA	no	1	5	99	NA	3	503	127	NA	1.765	NA	3.7349	-15.5934
971	1	NA	no	1	5	99	NA	4	503	127	NA	10.2837	NA	13.2392	16.3111
972	1	NA	no	1	6	193	NA	1	503	127	NA	8.2349	NA	7.1726	-4.4268
973	1	NA	no	1	6	193	NA	2	503	127	NA	3.9216	NA	4.746	-13.7988
974	1	NA	no	1	6	193	NA	3	503	127	NA	9.7446	NA	5.7571	-3.9283
975	1	NA	no	1	6	193	NA	4	503	127	NA	5.5391	NA	6.566	-10.4089
976	2	NA	no	2	1	NA	11	1	503	127	NA	13.4038	NA	11.5013	32.8849
977	2	NA	no	2	1	NA	11	2	503	127	NA	13.5738	NA	13.1845	39.6949
978	2	NA	no	2	1	NA	11	3	503	127	NA	NA	NA	NA	NA
979	2	NA	no	2	1	NA	11	4	503	127	NA	NA	NA	NA	NA
980	2	NA	no	2	2	NA	26	1	503	127	NA	15.5799	NA	10.7999	39.0463
981	2	NA	no	2	2	NA	26	2	503	127	NA	13.9138	NA	14.0262	41.5325
982	2	NA	no	2	2	NA	26	3	503	127	NA	5.0395	NA	7.5737	-9.8122
983	2	NA	no	2	2	NA	26	4	503	127	NA	16.2939	NA	14.7275	59.2599
984	2	NA	no	2	3	NA	19	1	503	127	NA	12.8258	NA	13.3248	36.0197
985	2	NA	no	2	3	NA	19	2	503	127	NA	5.0735	NA	9.9583	-4.948
986	2	NA	no	2	3	NA	19	3	503	127	NA	10.8197	NA	10.3791	17.2113
987	2	NA	no	2	3	NA	19	4	503	127	NA	9.8677	NA	11.9221	17.1032
988	2	NA	no	2	4	NA	14	1	503	127	NA	NA	NA	NA	NA
989	2	NA	no	2	4	NA	14	2	503	127	NA	NA	NA	NA	NA
990	2	NA	no	2	4	NA	14	3	503	127	NA	NA	NA	NA	NA
991	2	NA	no	2	4	NA	14	4	503	127	NA	NA	NA	NA	NA
992	1	NA	no	1	1	182	NA	1	504	128	NA	13.303	NA	12.127	34.1577
993	1	NA	no	1	1	182	NA	2	504	128	NA	8.2349	NA	12.3292	9.2323
994	1	NA	no	1	1	182	NA	3	504	128	NA	11.2542	NA	12.6326	24.4866
995	1	NA	no	1	1	182	NA	4	504	128	NA	9.8524	NA	10.1048	10.6281
996	1	NA	no	1	2	152	NA	1	504	128	NA	NA	NA	NA	NA
997	1	NA	no	1	2	152	NA	2	504	128	NA	13.4109	NA	12.5315	36.6502
998	1	NA	no	1	2	152	NA	3	504	128	NA	NA	NA	NA	NA
999	1	NA	no	1	2	152	NA	4	504	128	NA	13.1952	NA	11.8237	32.0639
1000	1	NA	no	1	3	189	NA	1	504	128	NA	NA	NA	NA	NA
1001	1	NA	no	1	3	189	NA	2	504	128	NA	15.9988	NA	12.0259	49.1129
1002	1	NA	no	1	3	189	NA	3	504	128	NA	3.2746	NA	8.2848	-11.4059
1003	1	NA	no	1	3	189	NA	4	504	128	NA	13.303	NA	11.5204	30.0699
1004	1	NA	no	1	4	188	NA	1	504	128	NA	14.8127	NA	13.8459	46.9194
1005	1	NA	no	1	4	188	NA	2	504	128	NA	8.7741	NA	10.1048	3.649
1006	1	NA	no	1	4	188	NA	3	504	128	NA	NA	NA	NA	NA
1007	1	NA	no	1	4	188	NA	4	504	128	NA	6.5096	NA	10.8126	-2.5325
1008	1	NA	no	1	5	84	NA	1	504	128	NA	12.5482	NA	13.8459	30.8675
1009	1	NA	no	1	5	84	NA	2	504	128	NA	7.4801	NA	10.4082	-0.7379
1010	1	NA	no	1	5	84	NA	3	504	128	NA	7.0488	NA	11.1159	-0.9373
1011	1	NA	no	1	5	84	NA	4	504	128	NA	13.303	NA	13.7448	34.6562
1012	1	NA	no	1	6	147	NA	1	504	128	NA	2.9511	NA	4.746	-14.5964
1013	1	NA	no	1	6	147	NA	2	504	128	NA	15.7832	NA	13.037	46.9194
1014	1	NA	no	1	6	147	NA	3	504	128	NA	14.2735	NA	13.037	37.049
1015	1	NA	no	1	6	147	NA	4	504	128	NA	11.1464	NA	11.6215	15.3141
1016	2	NA	no	2	1	NA	14	1	504	128	NA	14.3218	NA	8.9764	28.4531
1017	2	NA	no	2	1	NA	14	2	504	128	NA	NA	NA	NA	NA
1018	2	NA	no	2	1	NA	14	3	504	128	NA	9.3237	NA	10.5194	11.3742
1019	2	NA	no	2	1	NA	14	4	504	128	NA	16.1579	NA	15.2886	64.1241
1020	2	NA	no	2	2	NA	26	1	504	128	NA	8.3716	NA	7.8542	0.1324
1021	2	NA	no	2	2	NA	26	2	504	128	NA	13.9138	NA	12.6234	36.7763
1022	2	NA	no	2	2	NA	26	3	504	128	NA	NA	NA	NA	NA
1023	2	NA	no	2	2	NA	26	4	504	128	NA	12.9958	NA	5.6099	9.6447
1024	2	NA	no	2	3	NA	13	1	504	128	NA	13.1998	NA	12.4832	35.263
1025	2	NA	no	2	3	NA	13	2	504	128	NA	NA	NA	NA	NA
1026	2	NA	no	2	3	NA	13	3	504	128	NA	12.6558	NA	13.0443	34.074
1027	2	NA	no	2	3	NA	13	4	504	128	NA	8.9497	NA	10.5194	9.8609
1028	2	NA	no	2	4	NA	11	1	504	128	NA	NA	NA	NA	NA
1029	2	NA	no	2	4	NA	11	2	504	128	NA	NA	NA	NA	NA
1030	2	NA	no	2	4	NA	11	3	504	128	NA	NA	NA	NA	NA
1031	2	NA	no	2	4	NA	11	4	504	128	NA	NA	NA	NA	NA
1032	1	NA	no	1	1	207	NA	1	505	129	NA	5.2156	NA	9.4982	-5.6233
1033	1	NA	no	1	1	207	NA	2	505	129	NA	4.8921	NA	9.3971	-6.4209
1034	1	NA	no	1	1	207	NA	3	505	129	NA	14.0579	NA	12.8348	42.3332
1035	1	NA	no	1	1	207	NA	4	505	129	NA	NA	NA	NA	NA
1036	1	NA	no	1	2	132	NA	1	505	129	NA	NA	NA	NA	NA
1037	1	NA	no	1	2	132	NA	2	505	129	NA	NA	NA	NA	NA
1038	1	NA	no	1	2	132	NA	3	505	129	NA	NA	NA	NA	NA
1039	1	NA	no	1	2	132	NA	4	505	129	NA	NA	NA	NA	NA
1040	1	NA	no	1	3	8	NA	1	505	129	NA	16.3223	NA	14.0481	62.1738
1041	1	NA	no	1	3	8	NA	2	505	129	NA	10.3916	NA	12.127	16.7099
1042	1	NA	no	1	3	8	NA	3	505	129	NA	2.7355	NA	5.5549	-13.6991
1043	1	NA	no	1	3	8	NA	4	505	129	NA	13.7344	NA	13.6437	41.3362
1044	1	NA	no	1	4	8	NA	1	505	129	NA	14.3814	NA	12.8348	39.6412
1045	1	NA	no	1	4	8	NA	2	505	129	NA	NA	NA	NA	NA
1046	1	NA	no	1	4	8	NA	3	505	129	NA	11.0386	NA	11.8237	17.2084
1047	1	NA	no	1	4	8	NA	4	505	129	NA	17.0772	NA	12.8348	58.3851
1048	1	NA	no	1	5	46	NA	1	505	129	NA	15.5675	NA	16.2725	62.5726
1049	1	NA	no	1	5	46	NA	2	505	129	NA	7.4801	NA	13.1381	3.4496
1050	1	NA	no	1	5	46	NA	3	505	129	NA	11.2542	NA	13.4414	21.7947
1051	1	NA	no	1	5	46	NA	4	505	129	NA	11.9012	NA	8.4871	10.0299
1052	1	NA	no	1	6	17	NA	1	505	129	NA	11.0386	NA	12.6326	17.4078
1053	1	NA	no	1	6	17	NA	2	505	129	NA	NA	NA	NA	NA
1054	1	NA	no	1	6	17	NA	3	505	129	NA	NA	NA	NA	NA
1055	1	NA	no	1	6	17	NA	4	505	129	NA	12.7639	NA	14.0481	31.5654
1056	2	NA	no	2	1	NA	16	1	505	129	NA	NA	NA	NA	NA
1057	2	NA	no	2	1	NA	16	2	505	129	NA	14.1178	NA	14.5873	48.0181
1058	2	NA	no	2	1	NA	16	3	505	129	NA	18.912	NA	9.2569	53.3147
1059	2	NA	no	2	1	NA	16	4	505	129	NA	NA	NA	NA	NA
1060	2	NA	no	2	2	NA	29	1	505	129	NA	14.8318	NA	14.1664	47.5857
1061	2	NA	no	2	2	NA	29	2	505	129	NA	NA	NA	NA	NA
1062	2	NA	no	2	2	NA	29	3	505	129	NA	NA	NA	NA	NA
1063	2	NA	no	2	2	NA	29	4	505	129	NA	14.0838	NA	11.6415	34.3983
1064	2	NA	no	2	3	NA	17	1	505	129	NA	15.2399	NA	13.3248	50.0719
1065	2	NA	no	2	3	NA	17	2	505	129	NA	NA	NA	NA	NA
1066	2	NA	no	2	3	NA	17	3	505	129	NA	19.66	NA	17.9538	104.6594
1067	2	NA	no	2	3	NA	17	4	505	129	NA	11.5337	NA	12.6234	26.9398
1068	2	NA	no	2	4	NA	8	1	505	129	NA	NA	NA	NA	NA
1069	2	NA	no	2	4	NA	8	2	505	129	NA	NA	NA	NA	NA
1070	2	NA	no	2	4	NA	8	3	505	129	NA	NA	NA	NA	NA
1071	2	NA	no	2	4	NA	8	4	505	129	NA	NA	NA	NA	NA
1072	2	NA	no	2	1	NA	2	1	506	130	NA	12.2818	NA	12.0624	28.9936
1073	2	NA	no	2	1	NA	2	2	506	130	NA	10.9897	NA	12.2026	23.0484
1074	2	NA	no	2	1	NA	2	3	506	130	NA	11.3637	NA	11.5013	22.8322
1075	2	NA	no	2	1	NA	2	4	506	130	NA	12.2818	NA	11.5013	27.264
1076	2	NA	no	2	2	NA	5	1	506	130	NA	NA	NA	NA	NA
1077	2	NA	no	2	2	NA	5	2	506	130	NA	NA	NA	NA	NA
1078	2	NA	no	2	2	NA	5	3	506	130	NA	NA	NA	NA	NA
1079	2	NA	no	2	2	NA	5	4	506	130	NA	NA	NA	NA	NA
1080	2	NA	no	2	3	NA	12	1	506	130	NA	14.3218	NA	13.0443	43.4782
1081	2	NA	no	2	3	NA	12	2	506	130	NA	-1.7267	NA	1.6822	-25.3777
1082	2	NA	no	2	3	NA	12	3	506	130	NA	13.4038	NA	10.5194	29.534
1083	2	NA	no	2	3	NA	12	4	506	130	NA	NA	NA	NA	NA
1084	2	NA	no	2	4	NA	5	1	506	130	NA	18.572	NA	14.3067	71.3664
1085	2	NA	no	2	4	NA	5	2	506	130	NA	0.1434	NA	3.085	-23.5402
1086	2	NA	no	2	4	NA	5	3	506	130	NA	11.9418	NA	14.447	30.1826
1087	2	NA	no	2	4	NA	5	4	506	130	NA	11.3977	NA	13.0443	23.4808
1088	1	NA	no	1	1	53	NA	1	507	131	NA	4.2451	NA	6.7682	-10.4089
1089	1	NA	no	1	1	53	NA	2	507	131	NA	10.9307	NA	8.4871	10.0299
1090	1	NA	no	1	1	53	NA	3	507	131	NA	18.2633	NA	15.4636	91.2866
1091	1	NA	no	1	1	53	NA	4	507	131	NA	2.1963	NA	5.5549	-13.7988
1092	1	NA	no	1	2	134	NA	1	507	131	NA	NA	NA	NA	NA
1093	1	NA	no	1	2	134	NA	2	507	131	NA	NA	NA	NA	NA
1094	1	NA	no	1	2	134	NA	3	507	131	NA	NA	NA	NA	NA
1095	1	NA	no	1	2	134	NA	4	507	131	NA	NA	NA	NA	NA
1096	1	NA	no	1	3	104	NA	1	507	131	NA	NA	NA	NA	NA
1097	1	NA	no	1	3	104	NA	2	507	131	NA	9.5289	NA	12.5315	13.9182
1098	1	NA	no	1	3	104	NA	3	507	131	NA	9.5289	NA	9.5993	6.7397
1099	1	NA	no	1	3	104	NA	4	507	131	NA	NA	NA	NA	NA
1100	1	NA	no	1	4	104	NA	1	507	131	NA	13.0874	NA	12.5315	30.1696
1101	1	NA	no	1	4	104	NA	2	507	131	NA	3.9216	NA	6.7682	-12.0042
1102	1	NA	no	1	4	104	NA	3	507	131	NA	17.0772	NA	14.0481	65.4639
1103	1	NA	no	1	4	104	NA	4	507	131	NA	8.3428	NA	11.8237	5.4436
1104	1	NA	no	1	5	169	NA	1	507	131	NA	7.5879	NA	11.217	0.957
1105	1	NA	no	1	5	169	NA	2	507	131	NA	12.9795	NA	13.2392	31.1666
1106	1	NA	no	1	5	169	NA	3	507	131	NA	12.8717	NA	14.2503	33.9583
1107	1	NA	no	1	5	169	NA	4	507	131	NA	1.118	NA	3.836	-15.8925
1108	1	NA	no	1	6	168	NA	1	507	131	NA	15.6754	NA	14.4525	52.7021
1109	1	NA	no	1	6	168	NA	2	507	131	NA	15.244	NA	14.0481	47.8168
1110	1	NA	no	1	6	168	NA	3	507	131	NA	3.4903	NA	4.746	-14.0979
1111	1	NA	no	1	6	168	NA	4	507	131	NA	15.7832	NA	14.4525	53.7989
1112	2	NA	no	2	1	NA	11	1	507	131	NA	14.6618	NA	12.7637	44.5591
1113	2	NA	no	2	1	NA	11	2	507	131	NA	7.8616	NA	11.7818	8.1314
1114	2	NA	no	2	1	NA	11	3	507	131	NA	NA	NA	NA	NA
1115	2	NA	no	2	1	NA	11	4	507	131	NA	6.1956	NA	10.5194	-0.408
1116	2	NA	no	2	2	NA	22	1	507	131	NA	NA	NA	NA	NA
1117	2	NA	no	2	2	NA	22	2	507	131	NA	NA	NA	NA	NA
1118	2	NA	no	2	2	NA	22	3	507	131	NA	NA	NA	NA	NA
1119	2	NA	no	2	2	NA	22	4	507	131	NA	NA	NA	NA	NA
1120	2	NA	no	2	3	NA	8	1	507	131	NA	NA	NA	NA	NA
1121	2	NA	no	2	3	NA	8	2	507	131	NA	16.1579	NA	12.0624	50.5043
1122	2	NA	no	2	3	NA	8	3	507	131	NA	NA	NA	NA	NA
1123	2	NA	no	2	3	NA	8	4	507	131	NA	NA	NA	NA	NA
1124	2	NA	no	2	4	NA	5	1	507	131	NA	NA	NA	NA	NA
1125	2	NA	no	2	4	NA	5	2	507	131	NA	NA	NA	NA	NA
1126	2	NA	no	2	4	NA	5	3	507	131	NA	NA	NA	NA	NA
1127	2	NA	no	2	4	NA	5	4	507	131	NA	NA	NA	NA	NA
1128	2	NA	no	2	1	NA	44	1	508	132	NA	2.6935	NA	8.1348	-13.7036
1129	2	NA	no	2	1	NA	44	2	508	132	NA	6.1956	NA	11.7818	1.6458
1130	2	NA	no	2	1	NA	44	3	508	132	NA	NA	NA	NA	NA
1131	2	NA	no	2	1	NA	44	4	508	132	NA	0.6534	NA	6.0307	-19.6488
1132	2	NA	no	2	2	NA	25	1	508	132	NA	14.2878	NA	11.2207	33.8578
1133	2	NA	no	2	2	NA	25	2	508	132	NA	NA	NA	NA	NA
1134	2	NA	no	2	2	NA	25	3	508	132	NA	NA	NA	NA	NA
1135	2	NA	no	2	2	NA	25	4	508	132	NA	10.9557	NA	7.5737	8.2395
1136	2	NA	no	2	3	NA	19	1	508	132	NA	1.7754	NA	4.7682	-18.8921
1137	2	NA	no	2	3	NA	19	2	508	132	NA	3.4415	NA	5.4696	-15.0007
1138	2	NA	no	2	3	NA	19	3	508	132	NA	NA	NA	NA	NA
1139	2	NA	no	2	3	NA	19	4	508	132	NA	NA	NA	NA	NA
1140	2	NA	no	2	4	NA	6	1	508	132	NA	NA	NA	NA	NA
1141	2	NA	no	2	4	NA	6	2	508	132	NA	NA	NA	NA	NA
1142	2	NA	no	2	4	NA	6	3	508	132	NA	NA	NA	NA	NA
1143	2	NA	no	2	4	NA	6	4	508	132	NA	10.2757	NA	2.2433	-7.7584
1144	1	NA	no	1	1	41	NA	1	509	133	NA	NA	NA	NA	NA
1145	1	NA	no	1	1	41	NA	2	509	133	NA	14.7049	NA	15.0592	57.7869
1146	1	NA	no	1	1	41	NA	3	509	133	NA	NA	NA	NA	NA
1147	1	NA	no	1	1	41	NA	4	509	133	NA	NA	NA	NA	NA
1148	1	NA	no	1	2	205	NA	1	509	133	NA	14.2735	NA	11.8237	38.5445
1149	1	NA	no	1	2	205	NA	2	509	133	NA	8.9897	NA	8.4871	3.2502
1150	1	NA	no	1	2	205	NA	3	509	133	NA	10.7151	NA	12.4303	20.9971
1151	1	NA	no	1	2	205	NA	4	509	133	NA	9.9602	NA	11.1159	13.32
1152	1	NA	no	1	3	203	NA	1	509	133	NA	NA	NA	NA	NA
1153	1	NA	no	1	3	203	NA	2	509	133	NA	NA	NA	NA	NA
1154	1	NA	no	1	3	203	NA	3	509	133	NA	NA	NA	NA	NA
1155	1	NA	no	1	3	203	NA	4	509	133	NA	NA	NA	NA	NA
1156	1	NA	no	1	4	204	NA	1	509	133	NA	17.0772	NA	14.857	70.1499
1157	1	NA	no	1	4	204	NA	2	509	133	NA	NA	NA	NA	NA
1158	1	NA	no	1	4	204	NA	3	509	133	NA	NA	NA	NA	NA
1159	1	NA	no	1	4	204	NA	4	509	133	NA	14.3814	NA	12.8348	39.6412
1160	1	NA	no	1	5	66	NA	1	509	133	NA	12.4404	NA	12.5315	25.5833
1161	1	NA	no	1	5	66	NA	2	509	133	NA	10.8229	NA	12.6326	17.4078
1162	1	NA	no	1	5	66	NA	3	509	133	NA	4.8921	NA	11.217	-6.9194
1163	1	NA	no	1	5	66	NA	4	509	133	NA	10.6072	NA	12.127	14.8156
1164	1	NA	no	1	6	207	NA	1	509	133	NA	20.0965	NA	14.2503	89.0932
1165	1	NA	no	1	6	207	NA	2	509	133	NA	3.2746	NA	6.4649	-13.4997
1166	1	NA	no	1	6	207	NA	3	509	133	NA	18.3712	NA	14.857	77.2287
1167	1	NA	no	1	6	207	NA	4	509	133	NA	15.7832	NA	15.2614	57.6872
1168	2	NA	no	2	1	NA	3	1	509	133	NA	NA	NA	NA	NA
1169	2	NA	no	2	1	NA	3	2	509	133	NA	NA	NA	NA	NA
1170	2	NA	no	2	1	NA	3	3	509	133	NA	14.1178	NA	11.361	36.2359
1171	2	NA	no	2	1	NA	3	4	509	133	NA	NA	NA	NA	NA
1172	2	NA	no	2	2	NA	23	1	509	133	NA	NA	NA	NA	NA
1173	2	NA	no	2	2	NA	23	2	509	133	NA	13.1658	NA	15.1483	40.7758
1174	2	NA	no	2	2	NA	23	3	509	133	NA	9.4937	NA	12.2026	13.6442
1175	2	NA	no	2	2	NA	23	4	509	133	NA	NA	NA	NA	NA
1176	2	NA	no	2	3	NA	1	1	509	133	NA	17.0759	NA	12.904	59.9084
1177	2	NA	no	2	3	NA	1	2	509	133	NA	6.7396	NA	7.0126	-4.7318
1178	2	NA	no	2	3	NA	1	3	509	133	NA	NA	NA	NA	NA
1179	2	NA	no	2	3	NA	1	4	509	133	NA	NA	NA	NA	NA
1180	2	NA	no	2	4	NA	7	1	509	133	NA	NA	NA	NA	NA
1181	2	NA	no	2	4	NA	7	2	509	133	NA	NA	NA	NA	NA
1182	2	NA	no	2	4	NA	7	3	509	133	NA	NA	NA	NA	NA
1183	2	NA	no	2	4	NA	7	4	509	133	NA	NA	NA	NA	NA
1184	1	NA	no	1	1	33	NA	3	510	134	NA	4.6765	NA	10.8126	-5.6233
1185	1	NA	no	1	2	210	NA	2	510	134	NA	1.5493	NA	2.7238	-15.5934
1186	1	NA	no	1	2	210	NA	4	510	134	NA	18.0477	NA	14.1492	79.821
1187	1	NA	no	1	3	23	NA	2	510	134	NA	NA	NA	NA	NA
1188	1	NA	no	1	3	23	NA	4	510	134	NA	10.3916	NA	10.8126	13.1206
1189	1	NA	no	1	6	206	NA	1	510	134	NA	13.6265	NA	12.127	29.4717
1190	1	NA	no	1	6	206	NA	2	510	134	NA	14.0579	NA	1.106	-12.0042
1191	1	NA	no	1	6	206	NA	3	510	134	NA	12.2247	NA	10.1048	15.7129
1192	1	NA	no	1	6	206	NA	4	510	134	NA	15.3519	NA	13.2392	45.1248
1193	2	NA	no	2	1	NA	44	4	510	134	NA	1.9454	NA	8.4153	-15.1088
1194	2	NA	no	2	3	NA	10	3	510	134	NA	8.0316	NA	7.7139	0.4567
1195	2	NA	no	2	3	NA	10	4	510	134	NA	11.9078	NA	11.2207	24.6698
1196	2	NA	no	2	4	NA	8	1	510	134	NA	NA	NA	NA	NA
1197	2	NA	no	2	4	NA	8	2	510	134	NA	NA	NA	NA	NA
1198	2	NA	no	2	4	NA	8	4	510	134	NA	NA	NA	NA	NA
1199	1	NA	no	1	1	221	NA	2	511	135	NA	NA	NA	NA	NA
1200	1	NA	no	1	1	221	NA	3	511	135	NA	1.5493	NA	3.1282	-15.4937
1201	1	NA	no	1	2	78	NA	4	511	135	NA	NA	NA	NA	NA
1202	1	NA	no	1	3	206	NA	1	511	135	NA	NA	NA	NA	NA
1203	1	NA	no	1	3	206	NA	2	511	135	NA	NA	NA	NA	NA
1204	1	NA	no	1	3	206	NA	3	511	135	NA	NA	NA	NA	NA
1205	1	NA	no	1	3	206	NA	4	511	135	NA	NA	NA	NA	NA
1206	1	NA	no	1	4	191	NA	1	511	135	NA	4.9999	NA	8.5882	-8.714
1207	1	NA	no	1	4	191	NA	2	511	135	NA	2.3041	NA	5.3527	-14.4967
1208	1	NA	no	1	4	191	NA	4	511	135	NA	NA	NA	NA	NA
1209	1	NA	no	1	5	83	NA	2	511	135	NA	NA	NA	NA	NA
1210	1	NA	no	1	5	83	NA	3	511	135	NA	NA	NA	NA	NA
1211	1	NA	no	1	5	83	NA	4	511	135	NA	10.7151	NA	13.037	17.8066
1212	1	NA	no	1	6	94	NA	2	511	135	NA	NA	NA	NA	NA
1213	1	NA	no	1	6	94	NA	3	511	135	NA	NA	NA	NA	NA
1214	1	NA	no	1	6	94	NA	4	511	135	NA	NA	NA	NA	NA
1215	2	NA	no	2	1	NA	13	1	511	135	NA	NA	NA	NA	NA
1216	2	NA	no	2	1	NA	13	3	511	135	NA	3.4415	NA	4.4877	-16.1898
1217	2	NA	no	2	2	NA	28	4	511	135	NA	NA	NA	NA	NA
1218	2	NA	no	2	3	NA	13	1	511	135	NA	4.1555	NA	7.2931	-11.1093
1219	2	NA	no	2	4	NA	5	1	511	135	NA	NA	NA	NA	NA
1220	2	NA	no	2	4	NA	5	3	511	135	NA	NA	NA	NA	NA
1221	1	NA	no	1	1	79	NA	1	512	136	NA	10.9307	NA	11.8237	20.4985
1222	1	NA	no	1	1	79	NA	2	512	136	NA	NA	NA	NA	NA
1223	1	NA	no	1	1	79	NA	3	512	136	NA	NA	NA	NA	NA
1224	1	NA	no	1	1	79	NA	4	512	136	NA	-0.0682	NA	3.3305	-16.0919
1225	1	NA	no	1	2	209	NA	1	512	136	NA	3.5981	NA	7.2737	-11.0071
1226	1	NA	no	1	2	209	NA	2	512	136	NA	13.6265	NA	12.2281	36.2514
1227	1	NA	no	1	2	209	NA	3	512	136	NA	11.6856	NA	12.4303	25.9821
1228	1	NA	no	1	2	209	NA	4	512	136	NA	13.4109	NA	12.127	34.9553
1229	1	NA	no	1	3	75	NA	1	512	136	NA	NA	NA	NA	NA
1230	1	NA	no	1	3	75	NA	2	512	136	NA	10.3916	NA	10.8126	13.1206
1231	1	NA	no	1	3	75	NA	3	512	136	NA	6.6174	NA	10.1048	-1.9343
1232	1	NA	no	1	3	75	NA	4	512	136	NA	NA	NA	NA	NA
1233	1	NA	no	1	4	151	NA	1	512	136	NA	10.8229	NA	14.0481	21.9941
1234	1	NA	no	1	4	151	NA	2	512	136	NA	11.4699	NA	14.0481	25.8824
1235	1	NA	no	1	4	151	NA	3	512	136	NA	15.4597	NA	14.2503	53.7989
1236	1	NA	no	1	4	151	NA	4	512	136	NA	11.9012	NA	13.6437	26.9791
1237	1	NA	no	1	5	223	NA	1	512	136	NA	3.3825	NA	10.5093	-10.708
1238	1	NA	no	1	5	223	NA	2	512	136	NA	11.1464	NA	13.5426	21.2962
1239	1	NA	no	1	5	223	NA	3	512	136	NA	15.9988	NA	15.8681	64.0681
1240	1	NA	no	1	5	223	NA	4	512	136	NA	15.9988	NA	15.8681	64.0681
1241	1	NA	no	1	6	30	NA	1	512	136	NA	2.8433	NA	4.746	-14.6961
1242	1	NA	no	1	6	30	NA	2	512	136	NA	NA	NA	NA	NA
1243	1	NA	no	1	6	30	NA	3	512	136	NA	7.8036	NA	8.8915	-2.6322
1244	1	NA	no	1	6	30	NA	4	512	136	NA	7.8036	NA	9.1948	-2.1337
1245	1	NA	no	1	1	180	NA	4	513	137	NA	NA	NA	NA	NA
1246	1	NA	no	1	2	76	NA	1	513	137	NA	5.1078	NA	7.7793	-7.9164
1247	1	NA	no	1	2	76	NA	2	513	137	NA	5.2156	NA	8.0826	-7.3182
1248	1	NA	no	1	2	76	NA	4	513	137	NA	NA	NA	NA	NA
1249	1	NA	no	1	5	131	NA	1	513	137	NA	NA	NA	NA	NA
1250	1	NA	no	1	5	131	NA	2	513	137	NA	7.9114	NA	5.7571	-7.1188
1251	1	NA	no	1	5	131	NA	3	513	137	NA	8.5584	NA	11.8237	5.4436
1252	1	NA	no	1	5	131	NA	4	513	137	NA	NA	NA	NA	NA
1253	1	NA	no	1	6	145	NA	1	513	137	NA	12.1169	NA	12.8348	23.5893
1254	1	NA	no	1	6	145	NA	2	513	137	NA	15.244	NA	15.0592	52.5027
1255	1	NA	no	1	6	145	NA	3	513	137	NA	9.3132	NA	10.0037	3.8484
1256	1	NA	no	1	6	145	NA	4	513	137	NA	11.1464	NA	13.7448	21.1965
1257	2	NA	no	2	3	NA	2	1	513	137	NA	10.8197	NA	10.5194	17.5356
1258	2	NA	no	2	3	NA	2	2	513	137	NA	5.4475	NA	8.9764	-5.2723
1259	2	NA	no	2	3	NA	2	3	513	137	NA	NA	NA	NA	NA
1260	2	NA	no	2	4	NA	14	1	513	137	NA	NA	NA	NA	NA
1261	2	NA	no	2	4	NA	14	4	513	137	NA	NA	NA	NA	NA
1262	1	NA	no	1	1	212	NA	1	514	138	NA	13.95	NA	11.5204	35.5535
1263	1	NA	no	1	1	212	NA	2	514	138	NA	1.5493	NA	4.2405	-14.9952
1264	1	NA	no	1	1	212	NA	3	514	138	NA	12.3325	NA	14.0481	35.8526
1265	1	NA	no	1	1	212	NA	4	514	138	NA	9.6367	NA	10.4082	10.329
1266	1	NA	no	1	2	164	NA	1	514	138	NA	12.1169	NA	11.8237	26.0818
1267	1	NA	no	1	2	164	NA	2	514	138	NA	12.3325	NA	12.127	28.6741
1268	1	NA	no	1	2	164	NA	3	514	138	NA	19.773	NA	13.8459	93.4801
1269	1	NA	no	1	2	164	NA	4	514	138	NA	15.7832	NA	11.8237	48.0162
1270	1	NA	no	1	3	208	NA	1	514	138	NA	15.3519	NA	12.5315	47.1189
1271	1	NA	no	1	3	208	NA	2	514	138	NA	12.0091	NA	10.4082	19.1027
1272	1	NA	no	1	3	208	NA	3	514	138	NA	12.0091	NA	11.1159	21.4956
1273	1	NA	no	1	3	208	NA	4	514	138	NA	17.0772	NA	11.3181	52.3033
1274	1	NA	no	1	4	118	NA	1	514	138	NA	NA	NA	NA	NA
1275	1	NA	no	1	4	118	NA	2	514	138	NA	6.7253	NA	10.1048	-2.7319
1276	1	NA	no	1	4	118	NA	3	514	138	NA	11.3621	NA	11.6215	17.9063
1277	1	NA	no	1	4	118	NA	4	514	138	NA	15.3519	NA	14.5537	54.1977
1278	1	NA	no	1	5	129	NA	1	514	138	NA	13.0874	NA	13.8459	34.2574
1279	1	NA	no	1	5	129	NA	2	514	138	NA	16.8615	NA	14.5537	64.9654
1280	1	NA	no	1	5	129	NA	3	514	138	NA	12.8717	NA	13.5426	31.4657
1281	1	NA	no	1	5	129	NA	4	514	138	NA	7.5879	NA	12.127	2.4526
1282	1	NA	no	1	6	123	NA	1	514	138	NA	NA	NA	NA	NA
1283	1	NA	no	1	6	123	NA	2	514	138	NA	13.0874	NA	5.9593	4.646
1284	1	NA	no	1	6	123	NA	3	514	138	NA	12.9795	NA	10.2059	19.003
1285	1	NA	no	1	6	123	NA	4	514	138	NA	11.1464	NA	8.9926	8.1356
1286	2	NA	no	2	1	NA	5	1	514	138	NA	NA	NA	NA	NA
1287	2	NA	no	2	1	NA	5	2	514	138	NA	NA	NA	NA	NA
1288	2	NA	no	2	1	NA	5	3	514	138	NA	NA	NA	NA	NA
1289	2	NA	no	2	1	NA	5	4	514	138	NA	23.7061	NA	13.7456	113.6312
1290	2	NA	no	2	2	NA	35	1	514	138	NA	11.3297	NA	13.3248	25.2103
1291	2	NA	no	2	2	NA	35	2	514	138	NA	11.1257	NA	11.7818	20.1298
1292	2	NA	no	2	2	NA	35	3	514	138	NA	11.1257	NA	10.9402	17.8599
1293	2	NA	no	2	2	NA	35	4	514	138	NA	10.0377	NA	13.1845	18.5084
1294	2	NA	no	2	3	NA	4	1	514	138	NA	NA	NA	NA	NA
1295	2	NA	no	2	3	NA	4	2	514	138	NA	17.6199	NA	12.3429	60.7732
1296	2	NA	no	2	3	NA	4	3	514	138	NA	13.7438	NA	12.3429	37.7492
1297	2	NA	no	2	3	NA	4	4	514	138	NA	11.5337	NA	11.7818	24.5617
1298	2	NA	no	2	4	NA	8	1	514	138	NA	NA	NA	NA	NA
1299	2	NA	no	2	4	NA	8	2	514	138	NA	NA	NA	NA	NA
1300	2	NA	no	2	4	NA	8	3	514	138	NA	NA	NA	NA	NA
1301	2	NA	no	2	4	NA	8	4	514	138	NA	NA	NA	NA	NA
1302	1	NA	no	1	1	62	NA	1	515	139	NA	10.9307	NA	11.4193	19.2024
1303	1	NA	no	1	1	62	NA	2	515	139	NA	13.4109	NA	13.037	38.8436
1304	1	NA	no	1	1	62	NA	3	515	139	NA	5.3234	NA	6.9704	-8.3152
1305	1	NA	no	1	1	62	NA	4	515	139	NA	11.2542	NA	11.6215	21.1965
1306	1	NA	no	1	2	81	NA	1	515	139	NA	5.7548	NA	8.0826	-6.1218
1307	1	NA	no	1	2	81	NA	2	515	139	NA	4.6765	NA	8.7904	-7.717
1308	1	NA	no	1	2	81	NA	3	515	139	NA	10.4994	NA	9.4982	11.0269
1309	1	NA	no	1	2	81	NA	4	515	139	NA	11.6856	NA	11.8237	23.9881
1310	1	NA	no	1	3	212	NA	1	515	139	NA	NA	NA	NA	NA
1311	1	NA	no	1	3	212	NA	2	515	139	NA	NA	NA	NA	NA
1312	1	NA	no	1	3	212	NA	3	515	139	NA	15.9988	NA	12.4303	51.3063
1313	1	NA	no	1	3	212	NA	4	515	139	NA	14.3814	NA	11.5204	36.3511
1314	1	NA	no	1	4	136	NA	1	515	139	NA	15.1362	NA	15.0592	54.5965
1315	1	NA	no	1	4	136	NA	2	515	139	NA	12.656	NA	12.127	26.4806
1316	1	NA	no	1	4	136	NA	3	515	139	NA	1.765	NA	5.7571	-14.7958
1317	1	NA	no	1	4	136	NA	4	515	139	NA	NA	NA	NA	NA
1318	1	NA	no	1	5	44	NA	1	515	139	NA	9.8524	NA	11.217	9.6311
1319	1	NA	no	1	5	44	NA	2	515	139	NA	8.7741	NA	13.5426	9.9302
1320	1	NA	no	1	5	44	NA	3	515	139	NA	0.6867	NA	5.1504	-15.7928
1321	1	NA	no	1	5	44	NA	4	515	139	NA	5.3234	NA	5.8582	-11.1068
1322	1	NA	no	1	6	51	NA	1	515	139	NA	17.2928	NA	14.857	67.8568
1323	1	NA	no	1	6	51	NA	2	515	139	NA	14.8127	NA	13.5426	42.732
1324	1	NA	no	1	6	51	NA	3	515	139	NA	NA	NA	NA	NA
1325	1	NA	no	1	6	51	NA	4	515	139	NA	NA	NA	NA	NA
1326	2	NA	no	2	1	NA	4	1	515	139	NA	NA	NA	NA	NA
1327	2	NA	no	2	1	NA	4	2	515	139	NA	NA	NA	NA	NA
1328	2	NA	no	2	1	NA	4	3	515	139	NA	NA	NA	NA	NA
1329	2	NA	no	2	1	NA	4	4	515	139	NA	-1.9307	NA	3.085	-24.9454
1330	2	NA	no	2	2	NA	28	1	515	139	NA	NA	NA	NA	NA
1331	2	NA	no	2	2	NA	28	2	515	139	NA	NA	NA	NA	NA
1332	2	NA	no	2	2	NA	28	3	515	139	NA	NA	NA	NA	NA
1333	2	NA	no	2	2	NA	28	4	515	139	NA	NA	NA	NA	NA
1334	2	NA	no	2	3	NA	13	1	515	139	NA	NA	NA	NA	NA
1335	2	NA	no	2	3	NA	13	2	515	139	NA	NA	NA	NA	NA
1336	2	NA	no	2	3	NA	13	3	515	139	NA	NA	NA	NA	NA
1337	2	NA	no	2	3	NA	13	4	515	139	NA	NA	NA	NA	NA
1338	2	NA	no	2	4	NA	5	1	515	139	NA	4.0195	NA	5.4696	-15.4331
1339	2	NA	no	2	4	NA	5	2	515	139	NA	NA	NA	NA	NA
1340	2	NA	no	2	4	NA	5	3	515	139	NA	NA	NA	NA	NA
1341	2	NA	no	2	4	NA	5	4	515	139	NA	NA	NA	NA	NA
1342	1	NA	no	1	1	213	NA	1	516	140	NA	16.3223	NA	13.5426	62.4729
1343	1	NA	no	1	1	213	NA	2	516	140	NA	12.3325	NA	13.037	32.0639
1344	1	NA	no	1	1	213	NA	3	516	140	NA	16.1067	NA	14.2503	64.3672
1345	1	NA	no	1	1	213	NA	4	516	140	NA	11.7934	NA	12.127	25.683
1346	1	NA	no	1	2	169	NA	1	516	140	NA	NA	NA	NA	NA
1347	1	NA	no	1	2	169	NA	2	516	140	NA	4.4608	NA	7.1726	-9.8107
1348	1	NA	no	1	2	169	NA	3	516	140	NA	11.4699	NA	10.5093	18.2054
1349	1	NA	no	1	2	169	NA	4	516	140	NA	13.303	NA	10.8126	28.6741
1350	1	NA	no	1	3	214	NA	1	516	140	NA	NA	NA	NA	NA
1351	1	NA	no	1	3	214	NA	2	516	140	NA	NA	NA	NA	NA
1352	1	NA	no	1	3	214	NA	3	516	140	NA	11.5777	NA	11.3181	20.1994
1353	1	NA	no	1	3	214	NA	4	516	140	NA	12.2247	NA	13.2392	30.369
1354	1	NA	no	1	4	127	NA	1	516	140	NA	NA	NA	NA	NA
1355	1	NA	no	1	4	127	NA	2	516	140	NA	12.3325	NA	13.5426	28.9732
1356	1	NA	no	1	4	127	NA	3	516	140	NA	NA	NA	NA	NA
1357	1	NA	no	1	4	127	NA	4	516	140	NA	10.1759	NA	12.8348	15.3141
1358	1	NA	no	1	5	156	NA	1	516	140	NA	11.7934	NA	13.2392	24.1875
1359	1	NA	no	1	5	156	NA	2	516	140	NA	1.2258	NA	3.9371	-15.7928
1360	1	NA	no	1	5	156	NA	3	516	140	NA	11.9012	NA	16.2725	34.3571
1361	1	NA	no	1	5	156	NA	4	516	140	NA	NA	NA	NA	NA
1362	1	NA	no	1	6	148	NA	1	516	140	NA	9.8524	NA	12.4303	11.2263
1363	1	NA	no	1	6	148	NA	2	516	140	NA	NA	NA	NA	NA
1364	1	NA	no	1	6	148	NA	3	516	140	NA	14.9205	NA	15.0592	50.409
1365	1	NA	no	1	6	148	NA	4	516	140	NA	8.8819	NA	3.9371	-9.1128
1366	2	NA	no	2	1	NA	10	1	516	140	NA	5.6516	NA	6.5918	-8.407
1367	2	NA	no	2	1	NA	10	2	516	140	NA	15.0359	NA	13.1845	48.3424
1368	2	NA	no	2	1	NA	10	3	516	140	NA	0.6534	NA	3.085	-21.9187
1369	2	NA	no	2	1	NA	10	4	516	140	NA	17.2459	NA	15.2886	72.015
1370	2	NA	no	2	2	NA	26	1	516	140	NA	NA	NA	NA	NA
1371	2	NA	no	2	2	NA	26	2	516	140	NA	NA	NA	NA	NA
1372	2	NA	no	2	2	NA	26	3	516	140	NA	9.4937	NA	10.7999	10.5095
1373	2	NA	no	2	2	NA	26	4	516	140	NA	NA	NA	NA	NA
1374	2	NA	no	2	3	NA	10	1	516	140	NA	14.8658	NA	12.904	46.1805
1375	2	NA	no	2	3	NA	10	2	516	140	NA	12.8258	NA	11.7818	30.9392
1376	2	NA	no	2	3	NA	10	3	516	140	NA	14.8658	NA	12.2026	43.4782
1377	2	NA	no	2	3	NA	10	4	516	140	NA	13.4038	NA	11.2207	31.9121
1378	2	NA	no	2	4	NA	11	1	516	140	NA	NA	NA	NA	NA
1379	2	NA	no	2	4	NA	11	2	516	140	NA	NA	NA	NA	NA
1380	2	NA	no	2	4	NA	11	3	516	140	NA	NA	NA	NA	NA
1381	2	NA	no	2	4	NA	11	4	516	140	NA	NA	NA	NA	NA
1382	1	NA	no	1	1	73	NA	1	517	141	NA	8.9897	NA	12.6326	12.9212
1383	1	NA	no	1	1	73	NA	2	517	141	NA	2.1963	NA	5.5549	-13.7988
1384	1	NA	no	1	1	73	NA	3	517	141	NA	12.7639	NA	14.6548	40.8377
1385	1	NA	no	1	1	73	NA	4	517	141	NA	11.7934	NA	14.857	35.1547
1386	1	NA	no	1	2	48	NA	1	517	141	NA	NA	NA	NA	NA
1387	1	NA	no	1	2	48	NA	2	517	141	NA	NA	NA	NA	NA
1388	1	NA	no	1	2	48	NA	3	517	141	NA	NA	NA	NA	NA
1389	1	NA	no	1	2	48	NA	4	517	141	NA	NA	NA	NA	NA
1390	1	NA	no	1	3	121	NA	1	517	141	NA	5.7548	NA	8.4871	-6.2215
1391	1	NA	no	1	3	121	NA	2	517	141	NA	17.0772	NA	14.0481	68.7541
1392	1	NA	no	1	3	121	NA	3	517	141	NA	10.0681	NA	4.746	-4.028
1393	1	NA	no	1	3	121	NA	4	517	141	NA	14.9205	NA	13.037	46.9194
1394	1	NA	no	1	4	156	NA	1	517	141	NA	13.7344	NA	10.8126	27.2782
1395	1	NA	no	1	4	156	NA	2	517	141	NA	12.656	NA	13.5426	31.4657
1396	1	NA	no	1	4	156	NA	3	517	141	NA	15.7832	NA	13.3403	51.2066
1397	1	NA	no	1	4	156	NA	4	517	141	NA	1.765	NA	7.1726	-14.397
1398	1	NA	no	1	5	206	NA	1	517	141	NA	12.2247	NA	13.1381	26.0818
1399	1	NA	no	1	5	206	NA	2	517	141	NA	15.244	NA	7.1726	17.5075
1400	1	NA	no	1	5	206	NA	3	517	141	NA	NA	NA	NA	NA
1401	1	NA	no	1	5	206	NA	4	517	141	NA	0.471	NA	2.6227	-16.391
1402	1	NA	no	1	6	227	NA	1	517	141	NA	15.891	NA	14.0481	52.8018
1403	1	NA	no	1	6	227	NA	2	517	141	NA	5.7548	NA	5.7571	-10.8077
1404	1	NA	no	1	6	227	NA	3	517	141	NA	NA	NA	NA	NA
1405	1	NA	no	1	6	227	NA	4	517	141	NA	14.8127	NA	15.0592	49.412
1406	2	NA	no	2	1	NA	17	1	517	141	NA	13.1998	NA	13.3248	38.0734
1407	2	NA	no	2	1	NA	17	2	517	141	NA	1.2314	NA	5.3293	-19.3245
1408	2	NA	no	2	1	NA	17	3	517	141	NA	10.0717	NA	14.1664	23.5888
1409	2	NA	no	2	1	NA	17	4	517	141	NA	14.8658	NA	12.7637	45.64
1410	2	NA	no	2	2	NA	33	1	517	141	NA	NA	NA	NA	NA
1411	2	NA	no	2	2	NA	33	2	517	141	NA	8.7456	NA	10.7999	7.4828
1412	2	NA	no	2	2	NA	33	3	517	141	NA	NA	NA	NA	NA
1413	2	NA	no	2	2	NA	33	4	517	141	NA	NA	NA	NA	NA
1414	2	NA	no	2	3	NA	8	1	517	141	NA	NA	NA	NA	NA
1415	2	NA	no	2	3	NA	8	2	517	141	NA	NA	NA	NA	NA
1416	2	NA	no	2	3	NA	8	3	517	141	NA	NA	NA	NA	NA
1417	2	NA	no	2	3	NA	8	4	517	141	NA	NA	NA	NA	NA
1418	2	NA	no	2	4	NA	13	1	517	141	NA	NA	NA	NA	NA
1419	2	NA	no	2	4	NA	13	2	517	141	NA	NA	NA	NA	NA
1420	2	NA	no	2	4	NA	13	3	517	141	NA	NA	NA	NA	NA
1421	2	NA	no	2	4	NA	13	4	517	141	NA	NA	NA	NA	NA
1422	1	NA	no	1	1	67	NA	1	518	142	NA	6.9409	NA	4.4427	-9.3122
1423	1	NA	no	1	1	67	NA	2	518	142	NA	16.3223	NA	13.6437	63.0711
1424	1	NA	no	1	1	67	NA	3	518	142	NA	6.5096	NA	8.8915	-3.031
1425	1	NA	no	1	1	67	NA	4	518	142	NA	6.2939	NA	9.5993	-2.7319
1426	1	NA	no	1	2	143	NA	1	518	142	NA	16.9693	NA	13.5426	66.7601
1427	1	NA	no	1	2	143	NA	2	518	142	NA	11.1464	NA	13.037	24.9851
1428	1	NA	no	1	2	143	NA	3	518	142	NA	12.3325	NA	13.2392	32.8615
1429	1	NA	no	1	2	143	NA	4	518	142	NA	16.6458	NA	15.0592	73.6395
1430	1	NA	no	1	3	69	NA	1	518	142	NA	17.5085	NA	15.8681	83.6096
1431	1	NA	no	1	3	69	NA	2	518	142	NA	0.7945	NA	4.5438	-15.5934
1432	1	NA	no	1	3	69	NA	3	518	142	NA	11.4699	NA	12.4303	23.0908
1433	1	NA	no	1	3	69	NA	4	518	142	NA	12.656	NA	12.8348	31.366
1434	1	NA	no	1	4	97	NA	1	518	142	NA	13.5187	NA	13.1381	34.9553
1435	1	NA	no	1	4	97	NA	2	518	142	NA	2.0885	NA	6.566	-14.2973
1436	1	NA	no	1	4	97	NA	3	518	142	NA	10.4994	NA	11.0148	12.5224
1437	1	NA	no	1	4	97	NA	4	518	142	NA	11.7934	NA	13.2392	24.8854
1438	1	NA	no	1	5	202	NA	1	518	142	NA	15.7832	NA	14.5537	56.2914
1439	1	NA	no	1	5	202	NA	2	518	142	NA	7.4801	NA	12.127	1.9541
1440	1	NA	no	1	5	202	NA	3	518	142	NA	12.7639	NA	13.037	28.8735
1441	1	NA	no	1	5	202	NA	4	518	142	NA	8.2349	NA	12.2281	5.1445
1442	1	NA	no	1	6	105	NA	1	518	142	NA	2.412	NA	15.8681	-10.8077
1443	1	NA	no	1	6	105	NA	2	518	142	NA	3.4903	NA	6.7682	-13.0012
1444	1	NA	no	1	6	105	NA	3	518	142	NA	15.7832	NA	13.8459	50.8078
1445	1	NA	no	1	6	105	NA	4	518	142	NA	17.6163	NA	15.2614	73.6395
1446	2	NA	no	2	1	NA	4	1	518	142	NA	8.0316	NA	6.732	-1.5971
1447	2	NA	no	2	1	NA	4	2	518	142	NA	NA	NA	NA	NA
1448	2	NA	no	2	1	NA	4	3	518	142	NA	12.6558	NA	8.9764	21.1027
1449	2	NA	no	2	1	NA	4	4	518	142	NA	NA	NA	NA	NA
1450	2	NA	no	2	2	NA	34	1	518	142	NA	NA	NA	NA	NA
1451	2	NA	no	2	2	NA	34	2	518	142	NA	NA	NA	NA	NA
1452	2	NA	no	2	2	NA	34	3	518	142	NA	5.0395	NA	3.3655	-15.5412
1453	2	NA	no	2	2	NA	34	4	518	142	NA	NA	NA	NA	NA
1454	2	NA	no	2	3	NA	4	1	518	142	NA	10.4457	NA	7.5737	8.2395
1455	2	NA	no	2	3	NA	4	2	518	142	NA	6.3656	NA	7.7139	-4.6237
1456	2	NA	no	2	3	NA	4	3	518	142	NA	7.3176	NA	9.3972	1.3215
1457	2	NA	no	2	3	NA	4	4	518	142	NA	6.3656	NA	9.1167	-2.2456
1458	2	NA	no	2	4	NA	4	1	518	142	NA	10.1057	NA	8.4153	6.4019
1459	2	NA	no	2	4	NA	4	2	518	142	NA	10.4797	NA	8.9764	9.1042
1460	2	NA	no	2	4	NA	4	3	518	142	NA	7.8956	NA	8.1348	-1.5971
1461	2	NA	no	2	4	NA	4	4	518	142	NA	NA	NA	NA	NA
1462	1	NA	no	1	1	175	NA	1	519	143	NA	15.4597	NA	13.2392	53.6992
1463	1	NA	no	1	1	175	NA	2	519	143	NA	14.7049	NA	14.5537	55.2944
1464	1	NA	no	1	1	175	NA	3	519	143	NA	NA	NA	NA	NA
1465	1	NA	no	1	1	175	NA	4	519	143	NA	NA	NA	NA	NA
1466	1	NA	no	1	2	120	NA	1	519	143	NA	NA	NA	NA	NA
1467	1	NA	no	1	2	120	NA	2	519	143	NA	NA	NA	NA	NA
1468	1	NA	no	1	2	120	NA	3	519	143	NA	NA	NA	NA	NA
1469	1	NA	no	1	2	120	NA	4	519	143	NA	NA	NA	NA	NA
1470	1	NA	no	1	3	226	NA	1	519	143	NA	NA	NA	NA	NA
1471	1	NA	no	1	3	226	NA	2	519	143	NA	15.3519	NA	12.4303	46.6203
1472	1	NA	no	1	3	226	NA	3	519	143	NA	2.412	NA	6.9704	-13.3003
1473	1	NA	no	1	3	226	NA	4	519	143	NA	13.95	NA	11.8237	35.2544
1474	1	NA	no	1	4	140	NA	1	519	143	NA	NA	NA	NA	NA
1475	1	NA	no	1	4	140	NA	2	519	143	NA	0.5788	NA	3.1282	-16.1916
1476	1	NA	no	1	4	140	NA	3	519	143	NA	14.0579	NA	14.5537	44.2275
1477	1	NA	no	1	4	140	NA	4	519	143	NA	15.7832	NA	14.3514	56.3911
1478	1	NA	no	1	5	136	NA	1	519	143	NA	8.7741	NA	10.1048	3.1505
1479	1	NA	no	1	5	136	NA	2	519	143	NA	NA	NA	NA	NA
1480	1	NA	no	1	5	136	NA	3	519	143	NA	NA	NA	NA	NA
1481	1	NA	no	1	5	136	NA	4	519	143	NA	1.765	NA	7.1726	-14.4967
1482	1	NA	no	1	6	125	NA	1	519	143	NA	NA	NA	NA	NA
1483	1	NA	no	1	6	125	NA	2	519	143	NA	10.4994	NA	12.127	13.5194
1484	1	NA	no	1	6	125	NA	3	519	143	NA	7.8036	NA	10.1048	-0.7379
1485	1	NA	no	1	6	125	NA	4	519	143	NA	2.1963	NA	5.656	-14.8955
1486	2	NA	no	2	1	NA	42	1	519	143	NA	5.8216	NA	11.6415	0.1324
1487	2	NA	no	2	1	NA	42	2	519	143	NA	8.0316	NA	14.1664	13.7523
1488	2	NA	no	2	1	NA	42	3	519	143	NA	NA	NA	NA	NA
1489	2	NA	no	2	1	NA	42	4	519	143	NA	NA	NA	NA	NA
1490	2	NA	no	2	2	NA	20	1	519	143	NA	12.4178	NA	11.361	25.1022
1491	2	NA	no	2	2	NA	20	2	519	143	NA	5.7876	NA	8.275	-6.8937
1492	2	NA	no	2	2	NA	20	3	519	143	NA	6.9096	NA	8.275	-3.6508
1493	2	NA	no	2	2	NA	20	4	519	143	NA	18.878	NA	13.1845	69.745
1494	2	NA	no	2	3	NA	13	1	519	143	NA	NA	NA	NA	NA
1495	2	NA	no	2	3	NA	13	2	519	143	NA	11.7377	NA	11.361	24.1293
1496	2	NA	no	2	3	NA	13	3	519	143	NA	NA	NA	NA	NA
1497	2	NA	no	2	3	NA	13	4	519	143	NA	14.3218	NA	11.7818	38.8301
1498	2	NA	no	2	4	NA	7	1	519	143	NA	8.8137	NA	10.2388	5.6452
1499	2	NA	no	2	4	NA	7	2	519	143	NA	NA	NA	NA	NA
1500	2	NA	no	2	4	NA	7	3	519	143	NA	NA	NA	NA	NA
1501	2	NA	no	2	4	NA	7	4	519	143	NA	NA	NA	NA	NA
1502	2	NA	no	2	1	NA	8	1	520	144	NA	2.5235	NA	4.7682	-17.595
1503	2	NA	no	2	1	NA	8	2	520	144	NA	14.3218	NA	10.0986	32.6687
1504	2	NA	no	2	1	NA	8	3	520	144	NA	-1.5567	NA	1.6822	-25.1616
1505	2	NA	no	2	1	NA	8	4	520	144	NA	7.4876	NA	5.8904	-4.8399
1506	2	NA	no	2	2	NA	30	1	520	144	NA	9.4937	NA	11.6415	12.3471
1507	2	NA	no	2	2	NA	30	2	520	144	NA	7.9976	NA	11.7818	6.6181
1508	2	NA	no	2	2	NA	30	3	520	144	NA	10.7857	NA	13.3248	22.3998
1509	2	NA	no	2	2	NA	30	4	520	144	NA	6.9096	NA	11.6415	2.0781
1510	2	NA	no	2	3	NA	15	1	520	144	NA	12.1118	NA	9.818	21.2108
1511	2	NA	no	2	3	NA	15	2	520	144	NA	1.2314	NA	4.7682	-19.7569
1512	2	NA	no	2	3	NA	15	3	520	144	NA	24.0801	NA	17.9538	146.816
1513	2	NA	no	2	3	NA	15	4	520	144	NA	NA	NA	NA	NA
1514	2	NA	no	2	4	NA	10	1	520	144	NA	NA	NA	NA	NA
1515	2	NA	no	2	4	NA	10	2	520	144	NA	NA	NA	NA	NA
1516	2	NA	no	2	4	NA	10	3	520	144	NA	NA	NA	NA	NA
1517	2	NA	no	2	4	NA	10	4	520	144	NA	NA	NA	NA	NA
1518	1	NA	no	1	1	136	NA	1	521	145	NA	NA	NA	NA	NA
1519	1	NA	no	1	1	136	NA	2	521	145	NA	NA	NA	NA	NA
1520	1	NA	no	1	1	136	NA	3	521	145	NA	NA	NA	NA	NA
1521	1	NA	no	1	1	136	NA	4	521	145	NA	NA	NA	NA	NA
1522	1	NA	no	1	2	139	NA	1	521	145	NA	NA	NA	NA	NA
1523	1	NA	no	1	2	139	NA	2	521	145	NA	NA	NA	NA	NA
1524	1	NA	no	1	2	139	NA	3	521	145	NA	NA	NA	NA	NA
1525	1	NA	no	1	2	139	NA	4	521	145	NA	NA	NA	NA	NA
1526	1	NA	no	1	3	157	NA	1	521	145	NA	7.4801	NA	10.2059	1.1564
1527	1	NA	no	1	3	157	NA	2	521	145	NA	11.2542	NA	14.2503	28.0759
1528	1	NA	no	1	3	157	NA	3	521	145	NA	NA	NA	NA	NA
1529	1	NA	no	1	3	157	NA	4	521	145	NA	16.4302	NA	13.6437	60.9774
1530	1	NA	no	1	4	84	NA	1	521	145	NA	12.5482	NA	8.0826	11.6251
1531	1	NA	no	1	4	84	NA	2	521	145	NA	3.3825	NA	6.1615	-13.1009
1532	1	NA	no	1	4	84	NA	3	521	145	NA	NA	NA	NA	NA
1533	1	NA	no	1	4	84	NA	4	521	145	NA	16.3223	NA	12.5315	50.9075
1534	1	NA	no	1	5	125	NA	1	521	145	NA	14.597	NA	13.8459	44.1278
1535	1	NA	no	1	5	125	NA	2	521	145	NA	6.0783	NA	9.1948	-6.0221
1536	1	NA	no	1	5	125	NA	3	521	145	NA	11.9012	NA	12.8348	23.5893
1537	1	NA	no	1	5	125	NA	4	521	145	NA	11.9012	NA	12.8348	23.5893
1538	1	NA	no	1	6	28	NA	1	521	145	NA	12.4404	NA	11.8237	21.8944
1539	1	NA	no	1	6	28	NA	2	521	145	NA	NA	NA	NA	NA
1540	1	NA	no	1	6	28	NA	3	521	145	NA	6.5096	NA	6.1615	-9.3122
1541	1	NA	no	1	6	28	NA	4	521	145	NA	NA	NA	NA	NA
1542	2	NA	no	2	1	NA	23	1	521	145	NA	NA	NA	NA	NA
1543	2	NA	no	2	1	NA	23	2	521	145	NA	NA	NA	NA	NA
1544	2	NA	no	2	1	NA	23	3	521	145	NA	NA	NA	NA	NA
1545	2	NA	no	2	1	NA	23	4	521	145	NA	NA	NA	NA	NA
1546	2	NA	no	2	2	NA	23	1	521	145	NA	NA	NA	NA	NA
1547	2	NA	no	2	2	NA	23	2	521	145	NA	NA	NA	NA	NA
1548	2	NA	no	2	2	NA	23	3	521	145	NA	NA	NA	NA	NA
1549	2	NA	no	2	2	NA	23	4	521	145	NA	17.9599	NA	14.1664	68.1236
1550	2	NA	no	2	3	NA	13	1	521	145	NA	NA	NA	NA	NA
1551	2	NA	no	2	3	NA	13	2	521	145	NA	NA	NA	NA	NA
1552	2	NA	no	2	3	NA	13	3	521	145	NA	6.7396	NA	11.5013	3.2672
1553	2	NA	no	2	3	NA	13	4	521	145	NA	NA	NA	NA	NA
1554	2	NA	no	2	4	NA	4	1	521	145	NA	NA	NA	NA	NA
1555	2	NA	no	2	4	NA	4	2	521	145	NA	NA	NA	NA	NA
1556	2	NA	no	2	4	NA	4	3	521	145	NA	NA	NA	NA	NA
1557	2	NA	no	2	4	NA	4	4	521	145	NA	10.4797	NA	12.904	18.6165
1558	1	NA	no	1	1	64	NA	1	522	146	NA	NA	NA	NA	NA
1559	1	NA	no	1	1	64	NA	2	522	146	NA	NA	NA	NA	NA
1560	1	NA	no	1	1	64	NA	3	522	146	NA	4.7843	NA	6.4649	-9.8107
1561	1	NA	no	1	1	64	NA	4	522	146	NA	7.6958	NA	9.5993	1.7547
1562	1	NA	no	1	2	159	NA	1	522	146	NA	NA	NA	NA	NA
1563	1	NA	no	1	2	159	NA	2	522	146	NA	NA	NA	NA	NA
1564	1	NA	no	1	2	159	NA	3	522	146	NA	NA	NA	NA	NA
1565	1	NA	no	1	2	159	NA	4	522	146	NA	NA	NA	NA	NA
1566	1	NA	no	1	3	161	NA	1	522	146	NA	NA	NA	NA	NA
1567	1	NA	no	1	3	161	NA	2	522	146	NA	NA	NA	NA	NA
1568	1	NA	no	1	3	161	NA	3	522	146	NA	NA	NA	NA	NA
1569	1	NA	no	1	3	161	NA	4	522	146	NA	NA	NA	NA	NA
1570	1	NA	no	1	4	202	NA	1	522	146	NA	9.7446	NA	14.0481	16.2114
1571	1	NA	no	1	4	202	NA	2	522	146	NA	-1.6857	NA	2.4205	-16.6901
1572	1	NA	no	1	4	202	NA	3	522	146	NA	14.9205	NA	15.0592	53.4998
1573	1	NA	no	1	4	202	NA	4	522	146	NA	8.3428	NA	9.3971	0.957
1574	1	NA	no	1	5	94	NA	1	522	146	NA	15.9988	NA	16.677	68.1559
1575	1	NA	no	1	5	94	NA	2	522	146	NA	0.9023	NA	3.4316	-16.0919
1576	1	NA	no	1	5	94	NA	3	522	146	NA	11.6856	NA	13.2392	23.3899
1577	1	NA	no	1	5	94	NA	4	522	146	NA	NA	NA	NA	NA
1578	1	NA	no	1	6	92	NA	1	522	146	NA	5.6469	NA	10.1048	-6.6203
1579	1	NA	no	1	6	92	NA	2	522	146	NA	8.2349	NA	11.8237	3.4496
1580	1	NA	no	1	6	92	NA	3	522	146	NA	13.5187	NA	13.5426	33.9583
1581	1	NA	no	1	6	92	NA	4	522	146	NA	NA	NA	NA	NA
1582	2	NA	no	2	1	NA	11	1	522	146	NA	NA	NA	NA	NA
1583	2	NA	no	2	1	NA	11	2	522	146	NA	NA	NA	NA	NA
1584	2	NA	no	2	1	NA	11	3	522	146	NA	NA	NA	NA	NA
1585	2	NA	no	2	1	NA	11	4	522	146	NA	NA	NA	NA	NA
1586	2	NA	no	2	2	NA	9	1	522	146	NA	16.4979	NA	15.4289	63.4755
1587	2	NA	no	2	2	NA	9	2	522	146	NA	8.5416	NA	7.4334	-0.0837
1588	2	NA	no	2	2	NA	9	3	522	146	NA	16.2939	NA	15.1483	60.9894
1589	2	NA	no	2	2	NA	9	4	522	146	NA	14.0838	NA	16.2705	50.3962
1590	2	NA	no	2	3	NA	15	1	522	146	NA	NA	NA	NA	NA
1591	2	NA	no	2	3	NA	15	2	522	146	NA	NA	NA	NA	NA
1592	2	NA	no	2	3	NA	15	3	522	146	NA	NA	NA	NA	NA
1593	2	NA	no	2	3	NA	15	4	522	146	NA	NA	NA	NA	NA
1594	2	NA	no	2	4	NA	13	1	522	146	NA	NA	NA	NA	NA
1595	2	NA	no	2	4	NA	13	2	522	146	NA	NA	NA	NA	NA
1596	2	NA	no	2	4	NA	13	3	522	146	NA	11.3977	NA	10.0986	15.5899
1597	2	NA	no	2	4	NA	13	4	522	146	NA	6.7736	NA	10.0986	-1.8132
1598	1	NA	no	1	1	96	NA	1	523	147	NA	NA	NA	NA	NA
1599	1	NA	no	1	1	96	NA	2	523	147	NA	NA	NA	NA	NA
1600	1	NA	no	1	1	96	NA	3	523	147	NA	2.1963	NA	4.9482	-14.0979
1601	1	NA	no	1	1	96	NA	4	523	147	NA	NA	NA	1.9149	NA
1602	1	NA	no	1	2	157	NA	2	523	147	NA	NA	NA	NA	NA
1603	1	NA	no	1	3	162	NA	1	523	147	NA	12.3325	NA	10.8126	22.4926
1604	1	NA	no	1	3	162	NA	2	523	147	NA	1.9806	NA	4.1393	-14.9952
1605	1	NA	no	1	3	162	NA	3	523	147	NA	9.3132	NA	11.217	9.6311
1606	1	NA	no	1	3	162	NA	4	523	147	NA	NA	NA	NA	NA
1607	1	NA	no	1	4	150	NA	2	523	147	NA	3.9216	NA	7.1726	-11.705
1608	1	NA	no	1	5	91	NA	2	523	147	NA	5.2156	NA	8.1837	-9.1128
1609	1	NA	no	1	6	160	NA	1	523	147	NA	10.3916	NA	8.4871	4.0478
1610	1	NA	no	1	6	160	NA	2	523	147	NA	12.4404	NA	12.4303	23.7887
1611	1	NA	no	1	6	160	NA	3	523	147	NA	17.832	NA	14.5537	70.6484
1612	1	NA	no	1	6	160	NA	4	523	147	NA	15.6754	NA	14.0481	50.8078
1613	2	NA	no	2	1	NA	23	1	523	147	NA	NA	NA	NA	NA
1614	2	NA	no	2	1	NA	23	2	523	147	NA	NA	NA	NA	NA
1615	2	NA	no	2	1	NA	23	3	523	147	NA	NA	NA	NA	NA
1616	2	NA	no	2	1	NA	23	4	523	147	NA	NA	NA	NA	NA
1617	2	NA	no	2	4	NA	17	1	523	147	NA	3.8495	NA	5.4696	-15.7574
1618	2	NA	no	2	4	NA	17	2	523	147	NA	NA	NA	NA	NA
1619	1	NA	no	1	1	5	NA	1	524	148	NA	NA	NA	NA	NA
1620	1	NA	no	1	1	5	NA	2	524	148	NA	NA	NA	NA	NA
1621	1	NA	no	1	2	200	NA	1	524	148	NA	3.9216	NA	6.7682	-11.0071
1622	1	NA	no	1	3	80	NA	2	524	148	NA	0.5788	NA	6.3638	-15.2943
1623	1	NA	no	1	3	80	NA	3	524	148	NA	1.9806	NA	4.4427	-14.7958
1624	1	NA	no	1	4	176	NA	2	524	148	NA	5.3234	NA	9.1948	-7.5176
1625	1	NA	no	1	4	176	NA	3	524	148	NA	NA	NA	NA	NA
1626	1	NA	no	1	5	159	NA	1	524	148	NA	4.1373	NA	10.8126	-9.2125
1627	1	NA	no	1	5	159	NA	3	524	148	NA	NA	NA	NA	NA
1628	1	NA	no	1	6	202	NA	1	524	148	NA	16.538	NA	13.4414	54.6962
1629	1	NA	no	1	6	202	NA	2	524	148	NA	9.4211	NA	9.1948	2.652
1630	1	NA	no	1	6	202	NA	3	524	148	NA	NA	NA	NA	NA
1631	1	NA	no	1	6	202	NA	4	524	148	NA	14.8127	NA	14.5537	47.2186
1632	2	NA	no	2	3	NA	1	1	524	148	NA	5.8216	NA	8.1348	-5.4884
1633	2	NA	no	2	3	NA	1	2	524	148	NA	5.8216	NA	11.0805	-0.8404
1634	2	NA	no	2	3	NA	1	3	524	148	NA	11.7377	NA	12.2026	26.6155
1635	2	NA	no	2	3	NA	1	4	524	148	NA	9.8677	NA	11.7818	16.7789
1636	2	NA	no	2	4	NA	1	1	524	148	NA	NA	NA	NA	NA
1637	1	NA	no	1	1	142	NA	1	525	149	NA	NA	NA	NA	NA
1638	1	NA	no	1	1	142	NA	2	525	149	NA	NA	NA	NA	NA
1639	1	NA	no	1	1	142	NA	3	525	149	NA	NA	NA	NA	NA
1640	1	NA	no	1	1	142	NA	4	525	149	NA	NA	NA	NA	NA
1641	1	NA	no	1	2	26	NA	1	525	149	NA	NA	NA	NA	NA
1642	1	NA	no	1	2	26	NA	2	525	149	NA	10.6072	NA	12.4303	20.2991
1643	1	NA	no	1	2	26	NA	3	525	149	NA	14.8127	NA	13.6437	50.8078
1644	1	NA	no	1	2	26	NA	4	525	149	NA	12.1169	NA	13.037	30.4687
1645	1	NA	no	1	3	154	NA	1	525	149	NA	NA	NA	NA	NA
1646	1	NA	no	1	3	154	NA	2	525	149	NA	NA	NA	NA	NA
1647	1	NA	no	1	3	154	NA	3	525	149	NA	12.3325	NA	14.6548	36.2514
1648	1	NA	no	1	3	154	NA	4	525	149	NA	15.3519	NA	15.0592	59.9803
1649	1	NA	no	1	4	26	NA	1	525	149	NA	13.6265	NA	7.7793	14.5165
1650	1	NA	no	1	4	26	NA	2	525	149	NA	12.0091	NA	3.7349	-4.3271
1651	1	NA	no	1	4	26	NA	3	525	149	NA	NA	NA	NA	NA
1652	1	NA	no	1	4	26	NA	4	525	149	NA	16.538	NA	12.3292	51.6054
1653	1	NA	no	1	5	128	NA	1	525	149	NA	14.3814	NA	14.2503	43.9284
1654	1	NA	no	1	5	128	NA	2	525	149	NA	9.5289	NA	8.8915	2.8514
1655	1	NA	no	1	5	128	NA	3	525	149	NA	13.5187	NA	12.8348	32.9612
1656	1	NA	no	1	5	128	NA	4	525	149	NA	1.4415	NA	5.7571	-15.1946
1657	1	NA	no	1	6	115	NA	1	525	149	NA	13.303	NA	12.6326	29.7708
1658	1	NA	no	1	6	115	NA	2	525	149	NA	13.6265	NA	13.037	32.8615
1659	1	NA	no	1	6	115	NA	3	525	149	NA	NA	NA	NA	NA
1660	1	NA	no	1	6	115	NA	4	525	149	NA	NA	NA	NA	NA
1661	2	NA	no	2	1	NA	26	1	525	149	NA	NA	NA	NA	NA
1662	2	NA	no	2	1	NA	26	2	525	149	NA	7.4876	NA	13.4651	9.8609
1663	2	NA	no	2	1	NA	26	3	525	149	NA	NA	NA	NA	NA
1664	2	NA	no	2	1	NA	26	4	525	149	NA	NA	NA	NA	NA
1665	2	NA	no	2	2	NA	34	1	525	149	NA	3.7475	NA	5.189	-15.7574
1666	2	NA	no	2	2	NA	34	2	525	149	NA	0.4494	NA	5.8904	-20.9459
1667	2	NA	no	2	2	NA	34	3	525	149	NA	9.2897	NA	13.1845	15.0494
1668	2	NA	no	2	2	NA	34	4	525	149	NA	8.5416	NA	13.4651	12.3471
1669	2	NA	no	2	3	NA	9	1	525	149	NA	12.2818	NA	8.4153	17.7518
1670	2	NA	no	2	3	NA	9	2	525	149	NA	1.7754	NA	4.7682	-18.8921
1671	2	NA	no	2	3	NA	9	3	525	149	NA	9.1537	NA	9.9583	9.3204
1672	2	NA	no	2	3	NA	9	4	525	149	NA	8.7797	NA	11.5013	11.2661
1673	2	NA	no	2	4	NA	13	1	525	149	NA	NA	NA	NA	NA
1674	2	NA	no	2	4	NA	13	2	525	149	NA	NA	NA	NA	NA
1675	2	NA	no	2	4	NA	13	3	525	149	NA	10.8537	NA	10.0986	13.3199
1676	2	NA	no	2	4	NA	13	4	525	149	NA	NA	NA	NA	NA
1677	1	NA	no	1	1	203	NA	1	526	150	NA	2.9511	NA	5.9593	-12.9015
1678	1	NA	no	1	1	203	NA	2	526	150	NA	9.7446	NA	11.4193	13.5194
1679	1	NA	no	1	1	203	NA	3	526	150	NA	12.4404	NA	13.037	32.8615
1680	1	NA	no	1	1	203	NA	4	526	150	NA	13.5187	NA	10.8126	30.1696
1681	1	NA	no	1	2	15	NA	1	526	150	NA	15.0284	NA	11.5204	42.0341
1682	1	NA	no	1	2	15	NA	2	526	150	NA	NA	NA	NA	NA
1683	1	NA	no	1	2	15	NA	3	526	150	NA	13.1952	NA	13.037	37.049
1684	1	NA	no	1	2	15	NA	4	526	150	NA	15.0284	NA	13.2392	50.7081
1685	1	NA	no	1	3	13	NA	1	526	150	NA	4.5686	NA	8.0826	-9.2125
1686	1	NA	no	1	3	13	NA	2	526	150	NA	4.353	NA	8.5882	-9.2125
1687	1	NA	no	1	3	13	NA	3	526	150	NA	13.95	NA	13.8459	44.1278
1688	1	NA	no	1	3	13	NA	4	526	150	NA	11.7934	NA	13.5426	28.9732
1689	1	NA	no	1	4	13	NA	1	526	150	NA	2.9511	NA	3.5327	-14.8955
1690	1	NA	no	1	4	13	NA	2	526	150	NA	NA	NA	NA	NA
1691	1	NA	no	1	4	13	NA	3	526	150	NA	13.4109	NA	13.1381	34.058
1692	1	NA	no	1	4	13	NA	4	526	150	NA	10.3916	NA	11.217	12.4227
1693	1	NA	no	1	5	47	NA	1	526	150	NA	9.8524	NA	12.3292	12.2233
1694	1	NA	no	1	5	47	NA	2	526	150	NA	13.303	NA	15.2614	40.3391
1695	1	NA	no	1	5	47	NA	3	526	150	NA	17.2928	NA	16.5759	80.1201
1696	1	NA	no	1	5	47	NA	4	526	150	NA	12.2247	NA	14.857	31.6651
1697	1	NA	no	1	6	41	NA	1	526	150	NA	17.0772	NA	15.6659	71.2466
1698	1	NA	no	1	6	41	NA	2	526	150	NA	NA	NA	NA	NA
1699	1	NA	no	1	6	41	NA	3	526	150	NA	5.9704	NA	8.0826	-8.1158
1700	1	NA	no	1	6	41	NA	4	526	150	NA	15.891	NA	13.2392	48.8138
1701	2	NA	no	2	1	NA	42	1	526	150	NA	5.4475	NA	12.3429	-0.1918
1702	2	NA	no	2	1	NA	42	2	526	150	NA	8.2356	NA	14.5873	15.4818
1703	2	NA	no	2	1	NA	42	3	526	150	NA	4.3595	NA	8.9764	-8.5151
1704	2	NA	no	2	1	NA	42	4	526	150	NA	10.2417	NA	14.447	25.3184
1705	2	NA	no	2	2	NA	14	1	526	150	NA	3.4075	NA	2.6642	-19.2164
1706	2	NA	no	2	2	NA	14	2	526	150	NA	14.2878	NA	7.0126	19.0489
1707	2	NA	no	2	2	NA	14	3	526	150	NA	NA	NA	NA	NA
1708	2	NA	no	2	2	NA	14	4	526	150	NA	NA	NA	NA	NA
1709	2	NA	no	2	3	NA	3	1	526	150	NA	NA	NA	NA	NA
1710	2	NA	no	2	3	NA	3	2	526	150	NA	NA	NA	NA	NA
1711	2	NA	no	2	3	NA	3	3	526	150	NA	NA	NA	NA	NA
1712	2	NA	no	2	3	NA	3	4	526	150	NA	NA	NA	NA	NA
1713	2	NA	no	2	4	NA	15	1	526	150	NA	NA	NA	NA	NA
1714	2	NA	no	2	4	NA	15	2	526	150	NA	9.5617	NA	10.2388	8.4557
1715	2	NA	no	2	4	NA	15	3	526	150	NA	NA	NA	NA	NA
1716	2	NA	no	2	4	NA	15	4	526	150	NA	8.9837	NA	9.818	5.4291
1717	1	NA	no	1	1	185	NA	1	527	151	NA	NA	NA	NA	NA
1718	1	NA	no	1	1	185	NA	2	527	151	NA	NA	NA	NA	NA
1719	1	NA	no	1	1	185	NA	3	527	151	NA	8.0193	NA	8.8915	1.1564
1720	1	NA	no	1	1	185	NA	4	527	151	NA	8.5584	NA	4.0382	-7.717
1721	1	NA	no	1	2	68	NA	1	527	151	NA	NA	NA	NA	NA
1722	1	NA	no	1	2	68	NA	2	527	151	NA	NA	NA	NA	NA
1723	1	NA	no	1	2	68	NA	3	527	151	NA	NA	NA	NA	NA
1724	1	NA	no	1	2	68	NA	4	527	151	NA	NA	NA	NA	NA
1725	1	NA	no	1	3	126	NA	1	527	151	NA	14.7049	NA	13.2392	46.0221
1726	1	NA	no	1	3	126	NA	2	527	151	NA	7.3723	NA	6.566	-5.5236
1727	1	NA	no	1	3	126	NA	3	527	151	NA	NA	NA	NA	NA
1728	1	NA	no	1	3	126	NA	4	527	151	NA	NA	NA	NA	NA
1729	1	NA	no	1	4	226	NA	1	527	151	NA	8.7741	NA	12.127	7.637
1730	1	NA	no	1	4	226	NA	2	527	151	NA	10.3916	NA	15.5648	23.689
1731	1	NA	no	1	4	226	NA	3	527	151	NA	14.1657	NA	15.5648	49.5117
1732	1	NA	no	1	4	226	NA	4	527	151	NA	NA	NA	NA	NA
1733	1	NA	no	1	5	75	NA	1	527	151	NA	NA	NA	NA	NA
1734	1	NA	no	1	5	75	NA	2	527	151	NA	16.6458	NA	15.2614	66.6604
1735	1	NA	no	1	5	75	NA	3	527	151	NA	NA	NA	NA	NA
1736	1	NA	no	1	5	75	NA	4	527	151	NA	5.5391	NA	10.6104	-5.8227
1737	1	NA	no	1	6	86	NA	1	527	151	NA	NA	NA	NA	NA
1738	1	NA	no	1	6	86	NA	2	527	151	NA	NA	NA	NA	NA
1739	1	NA	no	1	6	86	NA	3	527	151	NA	13.303	NA	13.6437	33.4597
1740	1	NA	no	1	6	86	NA	4	527	151	NA	1.2258	NA	3.7349	-15.9922
1741	2	NA	no	2	1	NA	4	1	527	151	NA	14.6618	NA	11.2207	38.722
1742	2	NA	no	2	1	NA	4	2	527	151	NA	9.6977	NA	10.6596	13.2118
1743	2	NA	no	2	1	NA	4	3	527	151	NA	16.9059	NA	10.9402	49.8557
1744	2	NA	no	2	1	NA	4	4	527	151	NA	7.6576	NA	8.9764	1.7539
1745	2	NA	no	2	2	NA	12	1	527	151	NA	-0.6727	NA	4.4877	-23.4321
1746	2	NA	no	2	2	NA	12	2	527	151	NA	8.9157	NA	9.3972	5.2129
1747	2	NA	no	2	2	NA	12	3	527	151	NA	NA	NA	NA	NA
1748	2	NA	no	2	2	NA	12	4	527	151	NA	-0.4686	NA	3.5058	-23.6482
1749	2	NA	no	2	3	NA	22	1	527	151	NA	NA	NA	NA	NA
1750	2	NA	no	2	3	NA	22	2	527	151	NA	NA	NA	NA	NA
1751	2	NA	no	2	3	NA	22	3	527	151	NA	NA	NA	NA	NA
1752	2	NA	no	2	3	NA	22	4	527	151	NA	NA	NA	NA	NA
1753	2	NA	no	2	4	NA	14	1	527	151	NA	NA	NA	NA	NA
1754	2	NA	no	2	4	NA	14	2	527	151	NA	NA	NA	NA	NA
1755	2	NA	no	2	4	NA	14	3	527	151	NA	NA	NA	NA	NA
1756	2	NA	no	2	4	NA	14	4	527	151	NA	NA	NA	NA	NA
1757	1	NA	no	1	1	217	NA	1	528	152	NA	15.1362	NA	13.5426	53.3003
1758	1	NA	no	1	1	217	NA	2	528	152	NA	15.0284	NA	12.8348	48.7141
1759	1	NA	no	1	1	217	NA	3	528	152	NA	2.412	NA	6.3638	-13.3003
1760	1	NA	no	1	1	217	NA	4	528	152	NA	14.3814	NA	13.4414	46.9194
1761	1	NA	no	1	2	77	NA	1	528	152	NA	3.059	NA	9.5993	-10.3092
1762	1	NA	no	1	2	77	NA	2	528	152	NA	8.5584	NA	10.1048	5.5433
1763	1	NA	no	1	2	77	NA	3	528	152	NA	2.3041	NA	6.3638	-13.4
1764	1	NA	no	1	2	77	NA	4	528	152	NA	15.891	NA	12.8348	54.3971
1765	1	NA	no	1	3	207	NA	1	528	152	NA	NA	NA	NA	NA
1766	1	NA	no	1	3	207	NA	2	528	152	NA	5.5391	NA	7.8804	-7.5176
1767	1	NA	no	1	3	207	NA	3	528	152	NA	NA	NA	NA	NA
1768	1	NA	no	1	3	207	NA	4	528	152	NA	16.3223	NA	13.037	56.4908
1769	1	NA	no	1	4	185	NA	1	528	152	NA	8.1271	NA	13.947	8.2353
1770	1	NA	no	1	4	185	NA	2	528	152	NA	11.3621	NA	14.857	27.4777
1771	1	NA	no	1	4	185	NA	3	528	152	NA	9.7446	NA	14.0481	16.2114
1772	1	NA	no	1	4	185	NA	4	528	152	NA	NA	NA	NA	NA
1773	1	NA	no	1	5	78	NA	1	528	152	NA	-1.2543	NA	2.7238	-16.6901
1774	1	NA	no	1	5	78	NA	2	528	152	NA	18.2633	NA	14.857	78.4251
1775	1	NA	no	1	5	78	NA	3	528	152	NA	NA	NA	NA	NA
1776	1	NA	no	1	5	78	NA	4	528	152	NA	11.9012	NA	12.127	21.3959
1777	1	NA	no	1	6	108	NA	1	528	152	NA	15.6754	NA	14.2503	51.8048
1778	1	NA	no	1	6	108	NA	2	528	152	NA	14.1657	NA	13.5426	38.2454
1779	1	NA	no	1	6	108	NA	3	528	152	NA	16.7537	NA	13.037	53.5995
1780	1	NA	no	1	6	108	NA	4	528	152	NA	NA	NA	NA	NA
1781	2	NA	no	2	1	NA	37	1	528	152	NA	NA	NA	NA	NA
1782	2	NA	no	2	1	NA	37	2	528	152	NA	NA	NA	NA	NA
1783	2	NA	no	2	1	NA	37	3	528	152	NA	NA	NA	NA	NA
1784	2	NA	no	2	1	NA	37	4	528	152	NA	NA	NA	NA	NA
1785	2	NA	no	2	2	NA	12	1	528	152	NA	10.5817	NA	7.8542	7.699
1786	2	NA	no	2	2	NA	12	2	528	152	NA	6.1616	NA	6.8723	-7.9746
1787	2	NA	no	2	2	NA	12	3	528	152	NA	12.9958	NA	8.8361	19.8056
1788	2	NA	no	2	2	NA	12	4	528	152	NA	5.2435	NA	6.0307	-11.5417
1789	2	NA	no	2	3	NA	4	1	528	152	NA	12.4518	NA	8.8361	19.8056
1790	2	NA	no	2	3	NA	4	2	528	152	NA	NA	NA	NA	NA
1791	2	NA	no	2	3	NA	4	3	528	152	NA	NA	NA	NA	NA
1792	2	NA	no	2	3	NA	4	4	528	152	NA	NA	NA	NA	NA
1793	2	NA	no	2	4	NA	10	1	528	152	NA	NA	NA	NA	NA
1794	2	NA	no	2	4	NA	10	2	528	152	NA	NA	NA	NA	NA
1795	2	NA	no	2	4	NA	10	3	528	152	NA	NA	NA	NA	NA
1796	2	NA	no	2	4	NA	10	4	528	152	NA	NA	NA	NA	NA
1797	1	NA	no	1	1	187	NA	1	529	153	NA	NA	NA	NA	NA
1798	1	NA	no	1	1	187	NA	2	529	153	NA	10.9307	NA	11.0148	17.9063
1799	1	NA	no	1	1	187	NA	3	529	153	NA	13.4109	NA	12.2281	35.3541
1800	1	NA	no	1	1	187	NA	4	529	153	NA	9.2054	NA	10.8126	9.7308
1801	1	NA	no	1	2	166	NA	1	529	153	NA	12.5482	NA	12.4303	30.5684
1802	1	NA	no	1	2	166	NA	2	529	153	NA	7.4801	NA	10.307	2.1535
1803	1	NA	no	1	2	166	NA	3	529	153	NA	NA	NA	NA	NA
1804	1	NA	no	1	2	166	NA	4	529	153	NA	NA	NA	NA	NA
1805	1	NA	no	1	3	227	NA	1	529	153	NA	9.6367	NA	11.1159	11.0269
1806	1	NA	no	1	3	227	NA	2	529	153	NA	9.4211	NA	11.1159	9.9302
1807	1	NA	no	1	3	227	NA	3	529	153	NA	13.7344	NA	11.0148	30.2693
1808	1	NA	no	1	3	227	NA	4	529	153	NA	7.4801	NA	7.7793	-3.1307
1809	1	NA	no	1	4	130	NA	1	529	153	NA	1.8728	NA	3.4316	-15.4937
1810	1	NA	no	1	4	130	NA	2	529	153	NA	6.4018	NA	6.3638	-8.6143
1811	1	NA	no	1	4	130	NA	3	529	153	NA	5.6469	NA	9.1948	-6.6203
1812	1	NA	no	1	4	130	NA	4	529	153	NA	13.1952	NA	13.1381	33.2603
1813	1	NA	no	1	5	126	NA	1	529	153	NA	13.303	NA	12.3292	29.4717
1814	1	NA	no	1	5	126	NA	2	529	153	NA	12.7639	NA	12.4303	26.7797
1815	1	NA	no	1	5	126	NA	3	529	153	NA	9.2054	NA	12.127	8.8335
1816	1	NA	no	1	5	126	NA	4	529	153	NA	1.5493	NA	3.9371	-15.6931
1817	1	NA	no	1	6	113	NA	1	529	153	NA	8.7741	NA	7.8804	-1.9343
1818	1	NA	no	1	6	113	NA	2	529	153	NA	11.4699	NA	8.9926	9.1326
1819	1	NA	no	1	6	113	NA	3	529	153	NA	6.1861	NA	4.9482	-11.1068
1820	1	NA	no	1	6	113	NA	4	529	153	NA	8.9897	NA	7.7793	-1.3361
1821	2	NA	no	2	1	NA	21	1	529	153	NA	NA	NA	NA	NA
1822	2	NA	no	2	1	NA	21	2	529	153	NA	NA	NA	NA	NA
1823	2	NA	no	2	1	NA	21	3	529	153	NA	NA	NA	NA	NA
1824	2	NA	no	2	1	NA	21	4	529	153	NA	NA	NA	NA	NA
1825	2	NA	no	2	2	NA	3	1	529	153	NA	NA	NA	NA	NA
1826	2	NA	no	2	2	NA	3	2	529	153	NA	15.3759	NA	6.4515	21.427
1827	2	NA	no	2	2	NA	3	3	529	153	NA	9.1197	NA	5.8904	-1.7052
1828	2	NA	no	2	2	NA	3	4	529	153	NA	8.3716	NA	5.189	-5.1642
1829	2	NA	no	2	3	NA	15	1	529	153	NA	8.0316	NA	7.5737	0.1324
1830	2	NA	no	2	3	NA	15	2	529	153	NA	0.8574	NA	5.6099	-19.6488
1831	2	NA	no	2	3	NA	15	3	529	153	NA	4.3595	NA	5.8904	-12.5146
1832	2	NA	no	2	3	NA	15	4	529	153	NA	8.4056	NA	10.5194	7.699
1833	2	NA	no	2	4	NA	17	1	529	153	NA	NA	NA	NA	NA
1834	2	NA	no	2	4	NA	17	2	529	153	NA	NA	NA	NA	NA
1835	2	NA	no	2	4	NA	17	3	529	153	NA	NA	NA	NA	NA
1836	2	NA	no	2	4	NA	17	4	529	153	NA	NA	NA	NA	NA
1837	1	NA	no	1	1	24	NA	1	530	154	NA	10.9307	NA	12.5315	22.692
1838	1	NA	no	1	1	24	NA	2	530	154	NA	NA	NA	NA	NA
1839	1	NA	no	1	1	24	NA	3	530	154	NA	NA	NA	NA	NA
1840	1	NA	no	1	1	24	NA	4	530	154	NA	13.6265	NA	10.8126	30.8675
1841	1	NA	no	1	2	145	NA	1	530	154	NA	11.5777	NA	14.5537	32.363
1842	1	NA	no	1	2	145	NA	2	530	154	NA	14.2735	NA	14.4525	50.7081
1843	1	NA	no	1	2	145	NA	3	530	154	NA	NA	NA	NA	NA
1844	1	NA	no	1	2	145	NA	4	530	154	NA	NA	NA	NA	NA
1845	1	NA	no	1	3	21	NA	1	530	154	NA	15.4597	NA	12.5315	48.1159
1846	1	NA	no	1	3	21	NA	2	530	154	NA	NA	NA	NA	NA
1847	1	NA	no	1	3	21	NA	3	530	154	NA	13.7344	NA	11.8237	33.6591
1848	1	NA	no	1	3	21	NA	4	530	154	NA	9.4211	NA	10.5093	8.4347
1849	1	NA	no	1	4	174	NA	1	530	154	NA	11.9012	NA	12.4303	23.0908
1850	1	NA	no	1	4	174	NA	2	530	154	NA	7.6958	NA	10.8126	1.2562
1851	1	NA	no	1	4	174	NA	3	530	154	NA	NA	NA	NA	NA
1852	1	NA	no	1	4	174	NA	4	530	154	NA	1.0102	NA	3.7349	-15.8925
1853	1	NA	no	1	5	97	NA	1	530	154	NA	15.7832	NA	15.6659	61.8747
1854	1	NA	no	1	5	97	NA	2	530	154	NA	11.9012	NA	14.857	29.9702
1855	1	NA	no	1	5	97	NA	3	530	154	NA	11.2542	NA	14.3514	24.3869
1856	1	NA	no	1	5	97	NA	4	530	154	NA	11.2542	NA	14.2503	24.0878
1857	1	NA	no	1	6	176	NA	1	530	154	NA	8.8819	NA	8.6893	-0.04
1858	1	NA	no	1	6	176	NA	2	530	154	NA	-1.0387	NA	13.8459	-16.2913
1859	1	NA	no	1	6	176	NA	3	530	154	NA	11.5777	NA	13.6437	23.0908
1860	1	NA	no	1	6	176	NA	4	530	154	NA	15.4597	NA	14.0481	49.8108
1861	2	NA	no	2	1	NA	22	1	530	154	NA	5.8216	NA	9.1167	-3.9751
1862	2	NA	no	2	1	NA	22	2	530	154	NA	NA	NA	NA	NA
1863	2	NA	no	2	1	NA	22	3	530	154	NA	8.9497	NA	11.6415	12.3471
1864	2	NA	no	2	1	NA	22	4	530	154	NA	NA	NA	NA	NA
1865	2	NA	no	2	2	NA	3	1	530	154	NA	6.5356	NA	4.4877	-10.8931
1866	2	NA	no	2	2	NA	3	2	530	154	NA	NA	NA	NA	NA
1867	2	NA	no	2	2	NA	3	3	530	154	NA	NA	NA	NA	NA
1868	2	NA	no	2	2	NA	3	4	530	154	NA	NA	NA	NA	NA
1869	2	NA	no	2	3	NA	10	1	530	154	NA	5.0735	NA	9.2569	-5.9208
1870	2	NA	no	2	3	NA	10	2	530	154	NA	NA	NA	NA	NA
1871	2	NA	no	2	3	NA	10	3	530	154	NA	6.5696	NA	9.6777	-0.6242
1872	2	NA	no	2	3	NA	10	4	530	154	NA	9.8677	NA	10.0986	12.5633
1873	2	NA	no	2	4	NA	13	1	530	154	NA	NA	NA	NA	NA
1874	2	NA	no	2	4	NA	13	2	530	154	NA	9.9357	NA	10.0986	9.6447
1875	2	NA	no	2	4	NA	13	3	530	154	NA	NA	NA	NA	NA
1876	2	NA	no	2	4	NA	13	4	530	154	NA	9.5617	NA	9.9583	7.8071
1877	1	NA	no	1	1	39	NA	1	531	155	NA	NA	NA	NA	NA
1878	1	NA	no	1	1	39	NA	2	531	155	NA	4.6765	NA	6.7682	-9.711
1879	1	NA	no	1	1	39	NA	3	531	155	NA	15.6754	NA	13.2392	55.6932
1880	1	NA	no	1	1	39	NA	4	531	155	NA	NA	NA	NA	NA
1881	1	NA	no	1	2	202	NA	1	531	155	NA	13.7344	NA	11.1159	32.1636
1882	1	NA	no	1	2	202	NA	2	531	155	NA	13.1952	NA	12.127	33.36
1883	1	NA	no	1	2	202	NA	3	531	155	NA	8.5584	NA	11.217	7.9362
1884	1	NA	no	1	2	202	NA	4	531	155	NA	16.4302	NA	13.037	59.5815
1885	1	NA	no	1	3	81	NA	1	531	155	NA	8.8819	NA	11.1159	7.7367
1886	1	NA	no	1	3	81	NA	2	531	155	NA	8.5584	NA	5.7571	-4.5265
1887	1	NA	no	1	3	81	NA	3	531	155	NA	0.5788	NA	7.1726	-15.0949
1888	1	NA	no	1	3	81	NA	4	531	155	NA	13.4109	NA	13.3403	38.3451
1889	1	NA	no	1	4	201	NA	1	531	155	NA	11.9012	NA	14.857	30.7678
1890	1	NA	no	1	4	201	NA	2	531	155	NA	2.9511	NA	8.0826	-12.5027
1891	1	NA	no	1	4	201	NA	3	531	155	NA	11.2542	NA	11.217	16.012
1892	1	NA	no	1	4	201	NA	4	531	155	NA	7.4801	NA	11.3181	1.1564
1893	1	NA	no	1	5	98	NA	1	531	155	NA	12.0091	NA	14.0481	28.2753
1894	1	NA	no	1	5	98	NA	2	531	155	NA	10.0681	NA	15.0592	19.3021
1895	1	NA	no	1	5	98	NA	3	531	155	NA	4.353	NA	11.5204	-8.0161
1896	1	NA	no	1	5	98	NA	4	531	155	NA	14.7049	NA	15.8681	53.9983
1897	1	NA	no	1	6	196	NA	1	531	155	NA	15.6754	NA	14.0481	50.8078
1898	1	NA	no	1	6	196	NA	2	531	155	NA	8.6662	NA	11.5204	4.3469
1899	1	NA	no	1	6	196	NA	3	531	155	NA	9.4211	NA	11.6215	7.7367
1900	1	NA	no	1	6	196	NA	4	531	155	NA	12.2247	NA	13.5426	26.5803
1901	2	NA	no	2	1	NA	41	1	531	155	NA	NA	NA	NA	NA
1902	2	NA	no	2	1	NA	41	2	531	155	NA	NA	NA	NA	NA
1903	2	NA	no	2	1	NA	41	3	531	155	NA	1.5714	NA	7.0126	-17.1626
1904	2	NA	no	2	1	NA	41	4	531	155	NA	6.5696	NA	9.1167	-1.5971
1905	2	NA	no	2	2	NA	20	1	531	155	NA	7.4536	NA	8.6958	-1.1647
1906	2	NA	no	2	2	NA	20	2	531	155	NA	13.3358	NA	12.904	34.6144
1907	2	NA	no	2	2	NA	20	3	531	155	NA	NA	NA	NA	NA
1908	2	NA	no	2	2	NA	20	4	531	155	NA	7.2496	NA	9.9583	0.4567
1909	2	NA	no	2	3	NA	13	1	531	155	NA	8.0316	NA	9.5375	4.24
1910	2	NA	no	2	3	NA	13	2	531	155	NA	6.0256	NA	9.9583	-2.0294
1911	2	NA	no	2	3	NA	13	3	531	155	NA	8.9497	NA	10.6596	10.1852
1912	2	NA	no	2	3	NA	13	4	531	155	NA	8.4056	NA	12.6234	12.1309
1913	2	NA	no	2	4	NA	6	1	531	155	NA	NA	NA	NA	NA
1914	2	NA	no	2	4	NA	6	2	531	155	NA	2.3534	NA	4.4877	-19.4326
1915	2	NA	no	2	4	NA	6	3	531	155	NA	NA	NA	NA	NA
1916	2	NA	no	2	4	NA	6	4	531	155	NA	NA	NA	NA	NA
1917	1	NA	no	1	2	116	NA	2	532	156	NA	NA	NA	NA	NA
1918	1	NA	no	1	2	116	NA	3	532	156	NA	NA	NA	NA	NA
1919	1	NA	no	1	3	221	NA	2	532	156	NA	NA	NA	NA	NA
1920	1	NA	no	1	3	221	NA	4	532	156	NA	11.4699	NA	5.3527	0.5582
1921	1	NA	no	1	5	145	NA	1	532	156	NA	12.3325	NA	13.6437	28.5744
1922	1	NA	no	1	5	145	NA	2	532	156	NA	NA	NA	NA	NA
1923	1	NA	no	1	5	145	NA	3	532	156	NA	4.4608	NA	8.0826	-10.4089
1924	1	NA	no	1	5	145	NA	4	532	156	NA	9.6367	NA	15.2614	17.5075
1925	1	NA	no	1	6	128	NA	1	532	156	NA	NA	NA	NA	NA
1926	1	NA	no	1	6	128	NA	2	532	156	NA	19.4495	NA	14.9581	87.7971
1927	1	NA	no	1	6	128	NA	3	532	156	NA	2.1963	NA	4.1393	-15.394
1928	1	NA	no	1	6	128	NA	4	532	156	NA	15.244	NA	14.0481	47.8168
1929	2	NA	no	2	1	NA	10	3	532	156	NA	NA	NA	NA	NA
1930	2	NA	no	2	2	NA	27	3	532	156	NA	NA	NA	NA	NA
1931	2	NA	no	2	3	NA	19	2	532	156	NA	NA	NA	NA	NA
1932	2	NA	no	2	3	NA	19	3	532	156	NA	12.2818	NA	17.1121	44.6672
1933	2	NA	no	2	3	NA	19	4	532	156	NA	13.4038	NA	15.4289	46.2886
1934	2	NA	no	2	4	NA	6	2	532	156	NA	4.3935	NA	5.7501	-14.3522
1935	1	NA	no	1	1	66	NA	1	533	157	NA	13.6265	NA	13.2392	41.4359
1936	1	NA	no	1	1	66	NA	2	533	157	NA	5.6469	NA	7.476	-7.2185
1937	1	NA	no	1	1	66	NA	3	533	157	NA	11.6856	NA	11.4193	22.5923
1938	1	NA	no	1	1	66	NA	4	533	157	NA	-0.4995	NA	3.3305	-16.1916
1939	1	NA	no	1	2	196	NA	1	533	157	NA	14.3814	NA	11.0148	35.5535
1940	1	NA	no	1	2	196	NA	2	533	157	NA	10.1759	NA	11.8237	16.5105
1941	1	NA	no	1	2	196	NA	3	533	157	NA	9.9602	NA	11.3181	13.9182
1942	1	NA	no	1	2	196	NA	4	533	157	NA	13.8422	NA	12.4303	38.7439
1943	1	NA	no	1	3	25	NA	1	533	157	NA	7.6958	NA	10.8126	2.652
1944	1	NA	no	1	3	25	NA	2	533	157	NA	8.0193	NA	9.7004	1.9541
1945	1	NA	no	1	3	25	NA	3	533	157	NA	11.5777	NA	13.1381	26.0818
1946	1	NA	no	1	3	25	NA	4	533	157	NA	11.1464	NA	12.8348	22.8914
1947	1	NA	no	1	4	149	NA	1	533	157	NA	11.2542	NA	13.8459	23.689
1948	1	NA	no	1	4	149	NA	2	533	157	NA	16.2145	NA	14.0481	57.8866
1949	1	NA	no	1	4	149	NA	3	533	157	NA	NA	NA	NA	NA
1950	1	NA	no	1	4	149	NA	4	533	157	NA	13.4109	NA	13.5426	35.6532
1951	1	NA	no	1	5	189	NA	1	533	157	NA	17.6163	NA	15.2614	74.8359
1952	1	NA	no	1	5	189	NA	2	533	157	NA	NA	NA	NA	NA
1953	1	NA	no	1	5	189	NA	3	533	157	NA	16.6458	NA	14.5537	62.772
1954	1	NA	no	1	5	189	NA	4	533	157	NA	NA	NA	0.7016	NA
1955	1	NA	no	1	6	100	NA	1	533	157	NA	11.5777	NA	14.2503	24.8854
1956	1	NA	no	1	6	100	NA	2	533	157	NA	4.1373	NA	8.1837	-11.2065
1957	1	NA	no	1	6	100	NA	3	533	157	NA	10.4994	NA	12.8348	15.3141
1958	1	NA	no	1	6	100	NA	4	533	157	NA	13.303	NA	13.8459	34.2574
1959	2	NA	no	2	1	NA	11	1	533	157	NA	NA	NA	NA	NA
1960	2	NA	no	2	1	NA	11	2	533	157	NA	NA	NA	NA	NA
1961	2	NA	no	2	1	NA	11	3	533	157	NA	NA	NA	NA	NA
1962	2	NA	no	2	1	NA	11	4	533	157	NA	NA	NA	NA	NA
1963	2	NA	no	2	2	NA	32	1	533	157	NA	8.5416	NA	10.5194	6.1857
1964	2	NA	no	2	2	NA	32	2	533	157	NA	6.1616	NA	7.9945	-6.2451
1965	2	NA	no	2	2	NA	32	3	533	157	NA	6.5356	NA	9.9583	-2.0294
1966	2	NA	no	2	2	NA	32	4	533	157	NA	18.708	NA	17.9538	91.9043
1967	2	NA	no	2	3	NA	23	1	533	157	NA	2.8635	NA	5.8904	-15.6493
1968	2	NA	no	2	3	NA	23	2	533	157	NA	4.1555	NA	9.9583	-7.7584
1969	2	NA	no	2	3	NA	23	3	533	157	NA	6.5696	NA	11.0805	1.8619
1970	2	NA	no	2	3	NA	23	4	533	157	NA	NA	NA	NA	NA
1971	2	NA	no	2	4	NA	7	1	533	157	NA	NA	NA	NA	NA
1972	2	NA	no	2	4	NA	7	2	533	157	NA	NA	NA	NA	NA
1973	2	NA	no	2	4	NA	7	3	533	157	NA	NA	NA	NA	NA
1974	2	NA	no	2	4	NA	7	4	533	157	NA	NA	NA	NA	NA
1975	1	NA	no	1	1	137	NA	1	534	158	NA	NA	NA	NA	NA
1976	1	NA	no	1	1	137	NA	2	534	158	NA	NA	NA	NA	NA
1977	1	NA	no	1	1	137	NA	3	534	158	NA	NA	NA	NA	NA
1978	1	NA	no	1	1	137	NA	4	534	158	NA	NA	NA	NA	NA
1979	1	NA	no	1	2	93	NA	1	534	158	NA	20.42	NA	12.5315	88.8938
1980	1	NA	no	1	2	93	NA	2	534	158	NA	0.6867	NA	12.5315	-13.2006
1981	1	NA	no	1	2	93	NA	3	534	158	NA	NA	NA	NA	NA
1982	1	NA	no	1	2	93	NA	4	534	158	NA	20.2043	NA	13.037	90.6884
1983	1	NA	no	1	3	201	NA	1	534	158	NA	NA	NA	NA	NA
1984	1	NA	no	1	3	201	NA	2	534	158	NA	11.0386	NA	10.8126	16.1117
1985	1	NA	no	1	3	201	NA	3	534	158	NA	NA	NA	NA	NA
1986	1	NA	no	1	3	201	NA	4	534	158	NA	NA	NA	NA	NA
1987	1	NA	no	1	4	94	NA	1	534	158	NA	NA	NA	NA	NA
1988	1	NA	no	1	4	94	NA	2	534	158	NA	10.7151	NA	11.217	13.6191
1989	1	NA	no	1	4	94	NA	3	534	158	NA	NA	NA	NA	NA
1990	1	NA	no	1	4	94	NA	4	534	158	NA	NA	NA	NA	NA
1991	1	NA	no	1	5	19	NA	1	534	158	NA	16.538	NA	15.4636	66.5607
1992	1	NA	no	1	5	19	NA	2	534	158	NA	11.2542	NA	13.2392	21.1965
1993	1	NA	no	1	5	19	NA	3	534	158	NA	11.4699	NA	10.8126	15.5135
1994	1	NA	no	1	5	19	NA	4	534	158	NA	11.7934	NA	13.8459	25.9821
1995	1	NA	no	1	6	184	NA	1	534	158	NA	13.303	NA	11.217	24.5863
1996	1	NA	no	1	6	184	NA	2	534	158	NA	15.891	NA	14.5537	55.2944
1997	1	NA	no	1	6	184	NA	3	534	158	NA	11.9012	NA	8.1837	8.1356
1998	1	NA	no	1	6	184	NA	4	534	158	NA	NA	NA	NA	NA
1999	2	NA	no	2	1	NA	13	1	534	158	NA	14.8658	NA	12.0624	42.9377
[truncated: 7,732 more rows]
